# Supplementary material
Source: PubMed Central journal article supplement (PMC5873854)
Supplement: jci-128-96342-s001.pdf [file jci-128-96342-s001.pdf]

## Supplemental Data

### **Tuberous sclerosis complex-associated CNS abnormalities depend on hyperactivation of mTORC1 and Akt**

Paola Zordan<sup>1</sup>, Manuela Cominelli<sup>2</sup>, Federica Cascino<sup>1</sup>, Elisa Tratta<sup>2</sup>, Pietro Luigi Poliani<sup>2</sup> and Rossella Galli<sup>1\*</sup>

<sup>1</sup>Neural Stem Cell Biology Unit, Division of Regenerative Medicine, Stem Cells and Gene Therapy, San Raffaele Scientific Institute, Via Olgettina 58, Milan, Italy, 20132;

<sup>2</sup>Department of Pathology, University of Brescia, Spedali Civili of Brescia, Brescia, Italy, 25124.

Supplemental Figure 1 – Efficient early post-natal targeted inactivation of *Tsc1* and *Pten* in Nestin-expressing SVZ pNSCs results in macroscopic phenotype alterations and very short mouse lifespan.

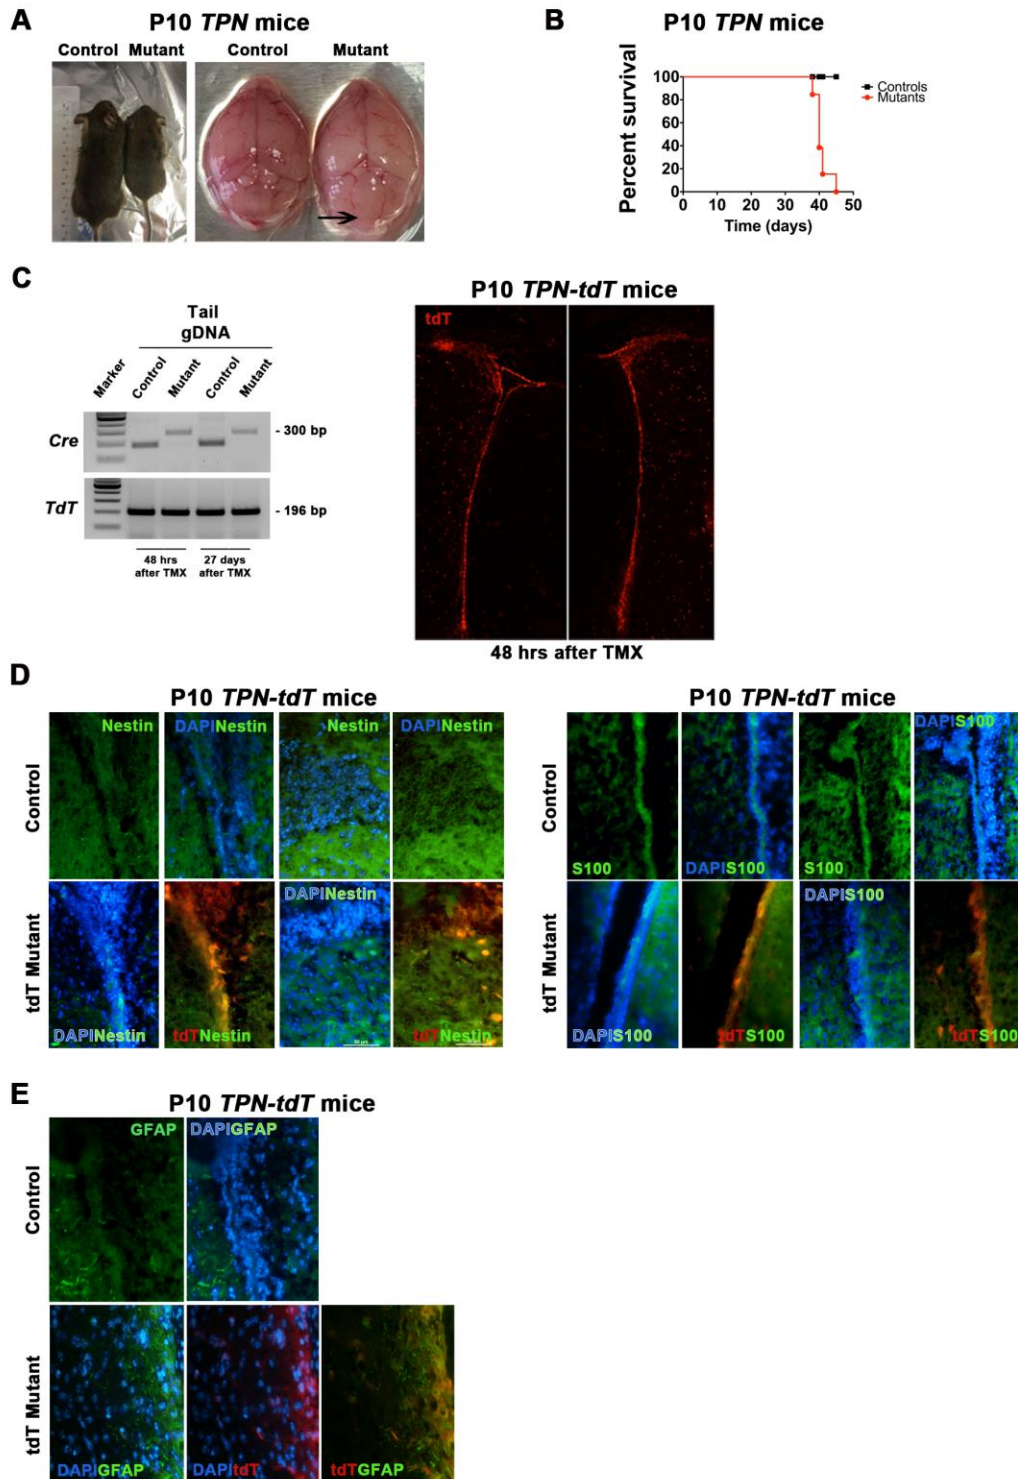

(A) Macroscopic appearance of *Tsc1<sup>c/c</sup>Pten<sup>c/c</sup>/Nestin-CreER<sup>T2+</sup>* (TPN) and *Tsc1<sup>c/c</sup>Pten<sup>c/c</sup>* mice control mice activated at P10 and analyzed at 38 days of life. Brains of mutant mice were significantly enlarged as compared to controls; in particular the cerebellum appears to be expanded (arrow).  
 (B) Kaplan-Meier survival curve for TPN mutant mice and controls ( $n=15$ ).

(C) PCR analysis of genomic DNA from the tail of mutant mice showing the presence of *Cre* recombinase and tdTomato reporter gene. Endogenous tdT protein fluorescence highlights efficient Cre-mediated recombination in the cells lining the lateral ventricles in *tdT<sup>c/c</sup>/Tsc1<sup>c/c</sup>Pten<sup>c/c</sup>/Nestin-CreER<sup>T2+</sup>(tdT-TPN)* mice 48 hours after TMX administration (magnification 40x).

(D) tdT positive cells (red) that were also immunoreactive (-IR) for nestin (green, left panels) and S100 (green, right panels) were detected 48 hours after Tamoxifen administration in the SVZ of *TPN-tdT* mice (merge, yellow; magnification 600x).

(E) Some of the tdT-IR cells (red) also expressed GFAP (green; 600x).

Supplemental Figure 2 – Lesions developing in TPN mice activated at P10 and P10-11 display features of SENs.

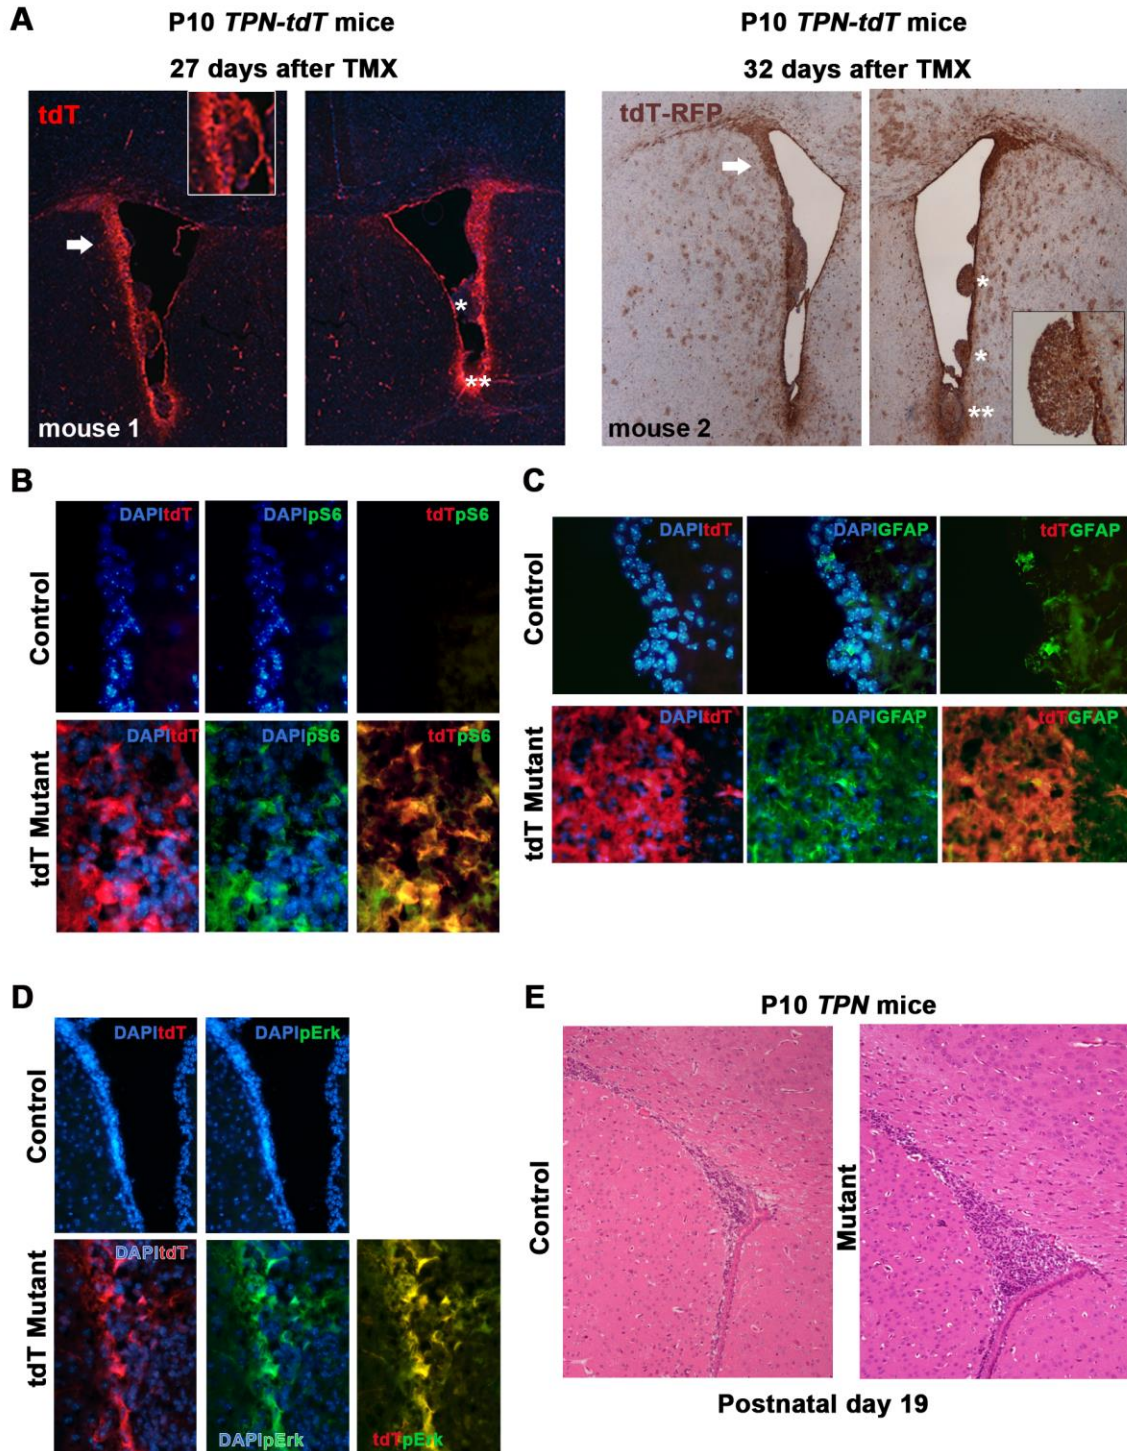

(A) Endogenous tdT protein fluorescence (red) highlights efficient Cre-mediated recombination in the lesions verging into the lateral ventricles in  $tdT^{c/c}/Tsc1^{c/c}Pten^{c/c}/Nestin-CreER^{T2+}(tdT-TPN)$  mice 27 days after TMX administration (mouse 1; 40x, inset 400x). The same pattern is observed when the endogenous tdT expression was detected by IHC with an antibody raised against the red fluorescent protein (RFP) (brown; mouse 2; 40x,

inset 400x). White solid arrow: upper SVZ expansion. \*: SEN-like nodular lesions. \*\*: bulb-like nodular abnormalities found in the proximity of the interventricular foramen (IF).

(B) Most of the tdT-positive cells within the nodules were pS6-IR (green; 600x).

(C) Many tdT-positive cells were also GFAP-IR (arrows, green; 600x).

(D) pERK hyperactivation was found in cells within the SVZ, whereas it was absent in cells making up the nodular lesions (green; control, 400x; mutant, 600x).

(E) A significant enlargement of the SVZ was evident 19 day after TMX administration in P10 *TPN* mice as compared to controls (H&E; 200x).



Supplemental Figure 3 - Efficient targeted inactivation of *Tsc1* and *Pten* in Nestin-expressing SVZ pNSCs at P15-17 results in macroscopic phenotypic alterations and reduced mouse lifespan, whereas no differences in the same features were detected when activation was performed at very late time points.

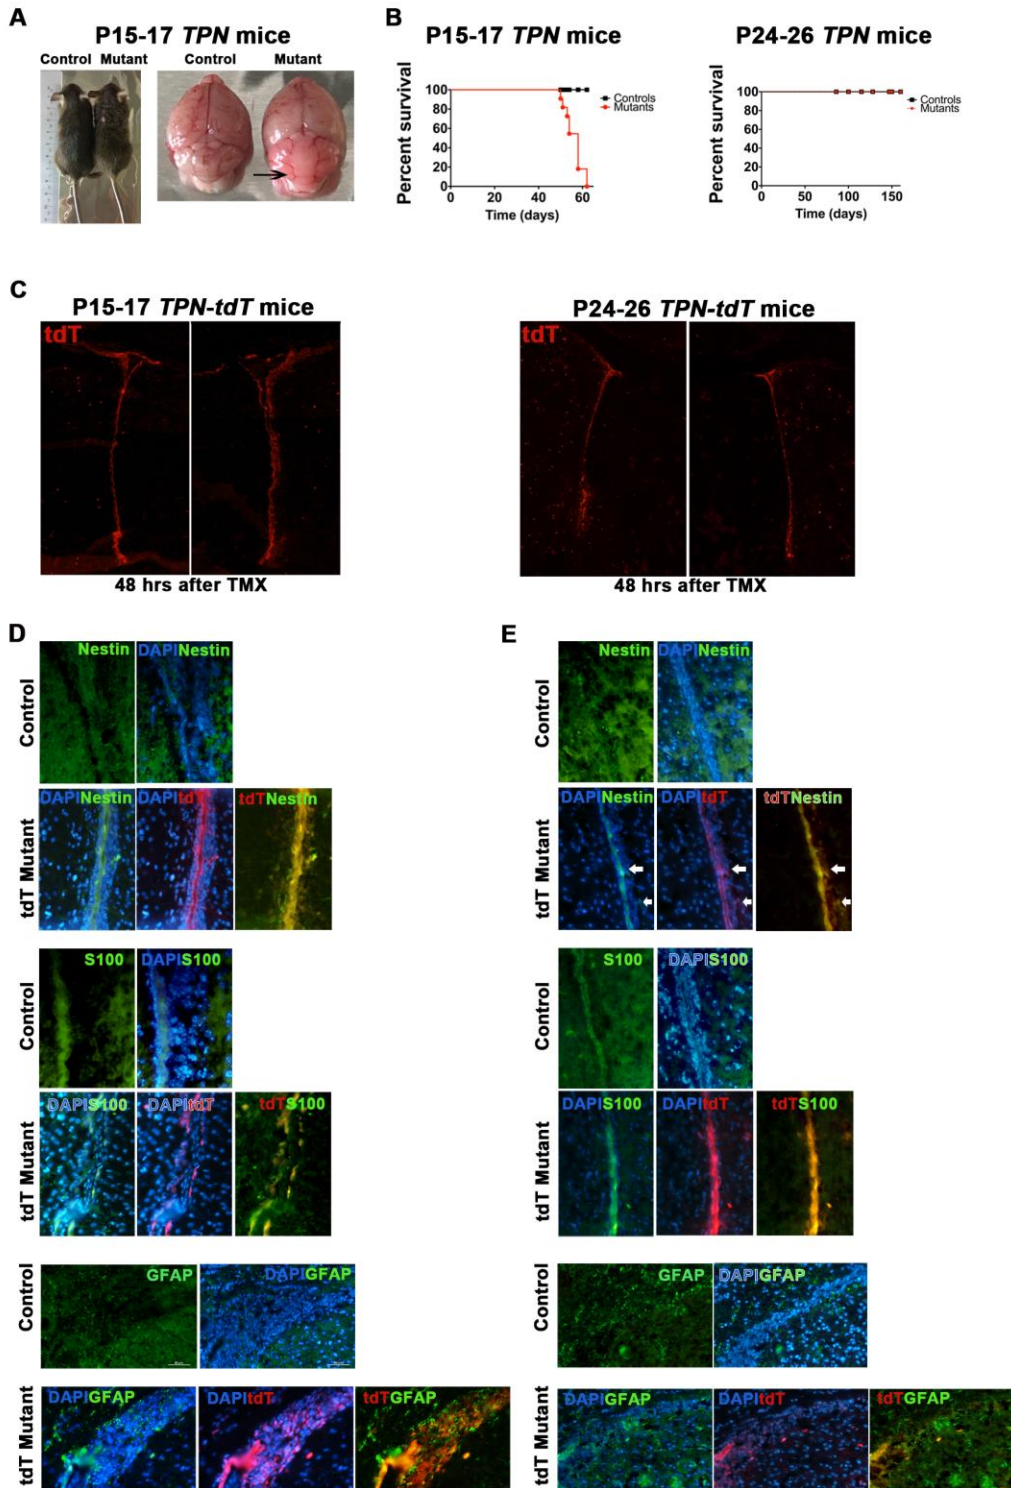

- (A) Macroscopic appearance of *Tsc1<sup>c/c</sup>Pten<sup>c/c</sup>/Nestin-CreER<sup>T2+</sup>(TPN)* and *Tsc1<sup>c/c</sup>Pten<sup>c/c</sup>* mice control mice activated at P15-17 and analyzed at 63 days of life. Brains of mutant mice are significantly enlarged as compared to controls; in particular the cerebellum appears to be expanded (arrow).
- (B) Kaplan-Meier survival curve for *TPN* mutant mice and controls activated at P15-17 ( $n=10$ ) and P24-26 ( $n=7$ ).
- (C) Endogenous tdT protein fluorescence highlights efficient Cre-mediated recombination in the cells lining the lateral ventricles in *tdT<sup>c/c</sup>/Tsc1<sup>c/c</sup>Pten<sup>c/c</sup>/Nestin-CreER<sup>T2+</sup>(tdT-TPN)* mice 48 hours after TMX administration at P15-17 and P24-26 (magnification 40x).
- (D) Many tdT positive cells (red) that were immunoreactive (-IR) for nestin (green, upper panels), S100 (green, middle panels) and GFAP were detected 48 hours after Tamoxifen administration in the SVZ of in *TPN-tdT* mice activated at P15-17 (merge, yellow; magnification 400x).
- (E) Few tdT positive cells (red) that were immunoreactive (-IR) for nestin (green, upper panels), S100 (green, middle panels) and GFAP were detected 48 hours after Tamoxifen administration in the SVZ of in *TPN-tdT* mice activated at 24-26 (merge, yellow; magnification 400x).

Supplemental Figure 4 - Late/very late post-natal targeted inactivation of *Tsc1* and *Pten* in SVZ pNSCs promotes the development of pNSC-derived SEGA-like lesions.

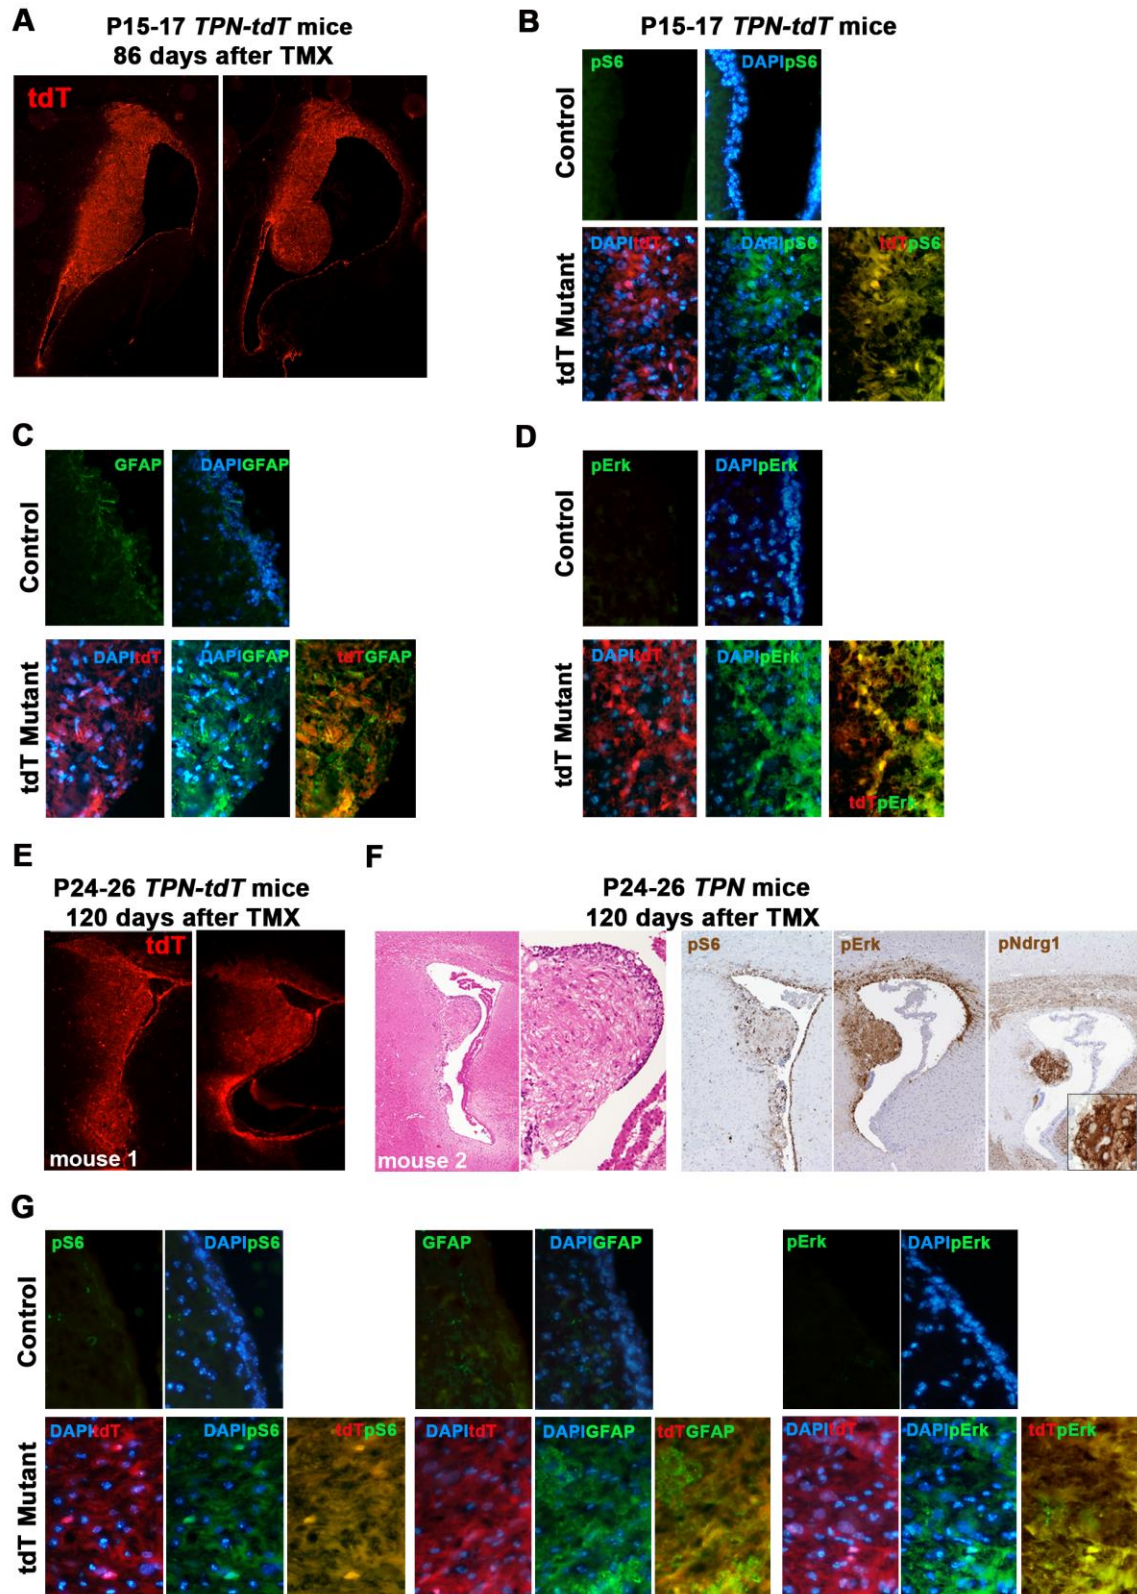



- (A) Endogenous tdT protein fluorescence (red) highlights efficient *Cre*-mediated recombination in the lesions verging into the lateral ventricles in *tdT<sup>+/c</sup>/Tsc1<sup>c/c</sup>Pten<sup>c/c</sup>/Nestin-CreER<sup>T2+</sup>(tdT-TPN)* mice 86 days after TMX administration at P15-17 (40x).
- (B) Most of the tdT-positive cells within the nodules were pS6-IR (green; 400x).
- (C) Some tdT-positive cells were also GFAP-IR (arrows, green; 400x).
- (D) Significant pERK hyperactivation was retrieved in the tdT cells making up the nodular lesions (green; 400x).
- (E) Endogenous tdT protein fluorescence (red) highlights efficient *Cre*-mediated recombination in focal lesions verging into the lateral ventricles in *tdT<sup>+/c</sup>/Tsc1<sup>c/c</sup>Pten<sup>c/c</sup>/Nestin-CreER<sup>T2+</sup>(tdT-TPN)* mice 120 days after TMX administration at P24-26 (40x).
- (F) H&E and IHC for pS6, pErk and pNrdg1 confirm the enhanced SEGA nature of the focal abnormalities developing in P24-26 *TPN* mice, such as the presence of spindle-shaped cells (inset in H&E) and pNrdg1-activating giant cells (inset in IHC).
- (G) Some of the tdT-positive cells within the lesions were pS6-IR (green; 600x) and GFAP-IR (green; 600x). Strong pERK hyperactivation was found in most cells within the P24-26 *TPN* lesions (green; control, 400x; mutant, 600x).

Supplemental Figure 5 - Postnatal NSCs isolated from SENs and SEGAs developing in *TPN* mice are reminiscent of the molecular and cellular characteristics of TSC brain abnormalities.

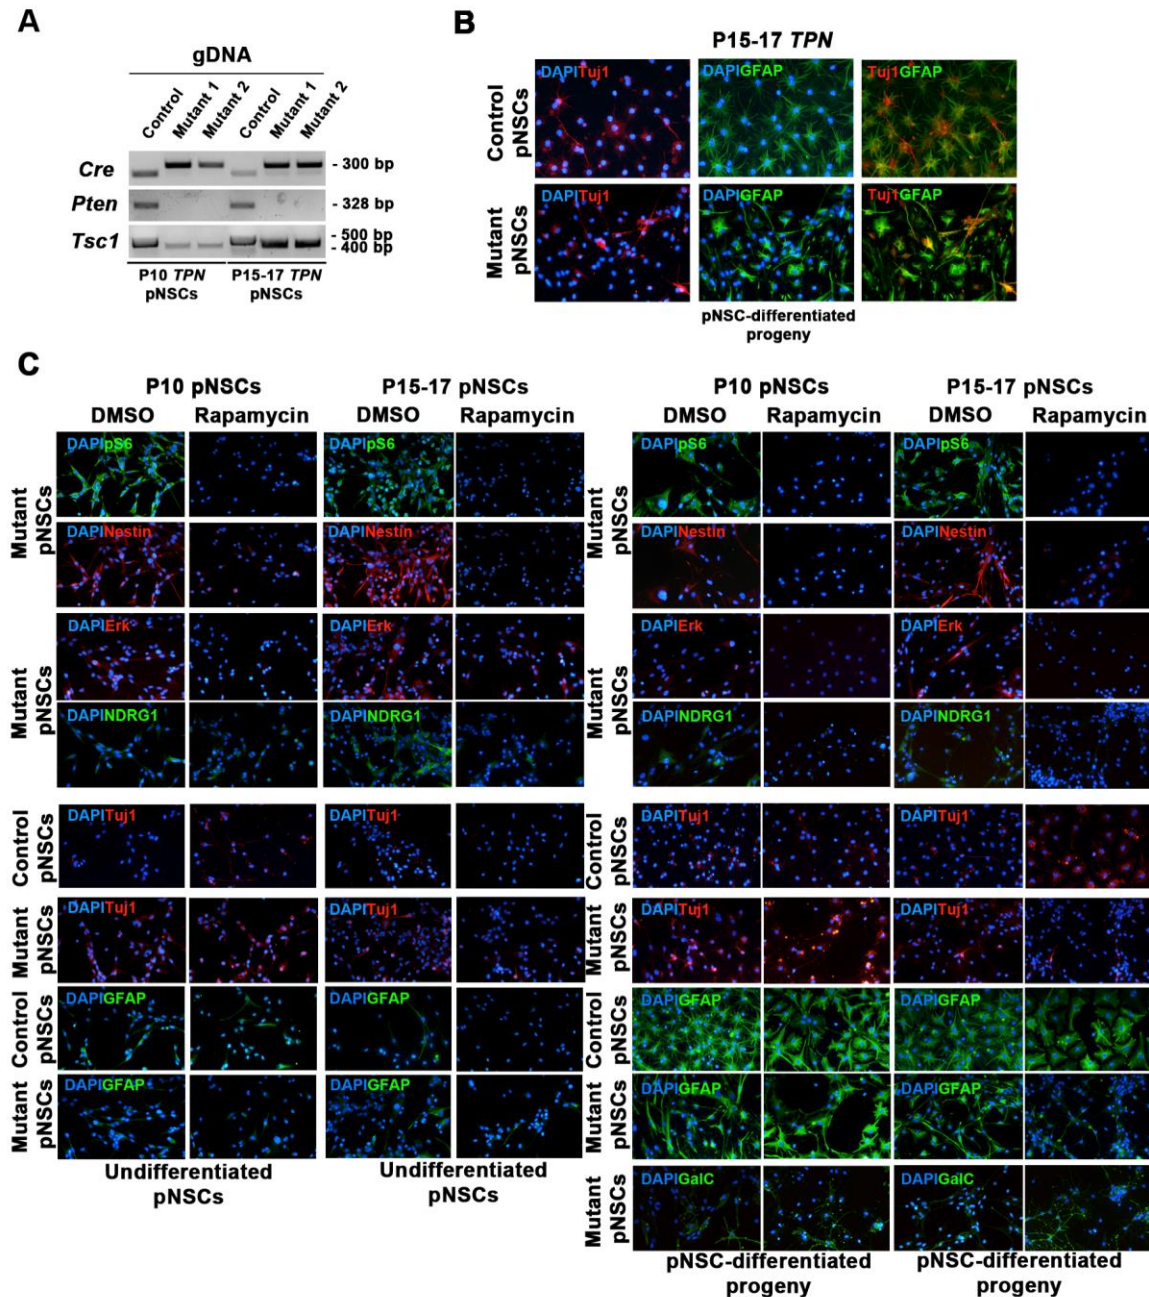

(A) PCR analysis of genomic DNA extracted from pNSCs showed *Cre* activation and complete deletion of *Tsc1* and *Pten* in mutant pNSC lines with respect to control pNSC lines.

(B) Some cells in P15-17 *TPN* pNSC-derived differentiated progeny were IR for both neuronal and glial markers, suggesting that the differentiation of mutant pNSCs was impaired (Tuj1, red; GFAP, green; merge, yellow).

(C) Treatment of P10 and P15-17 *TPN* mutant pNSCs with 100 nM rapamycin did not rescue the impaired differentiation into neuronal cells (Tuj1, red), whereas it partially restored mutant pNSC differentiation into morphologically normal GFAP- and GalC-IR cells (green) in both undifferentiated and differentiated pNSC cultures (magnification 400x).



Supplemental Figure 6 - SEGA pNSCs give rise to tumors that express the same markers found in the corresponding human lesions.

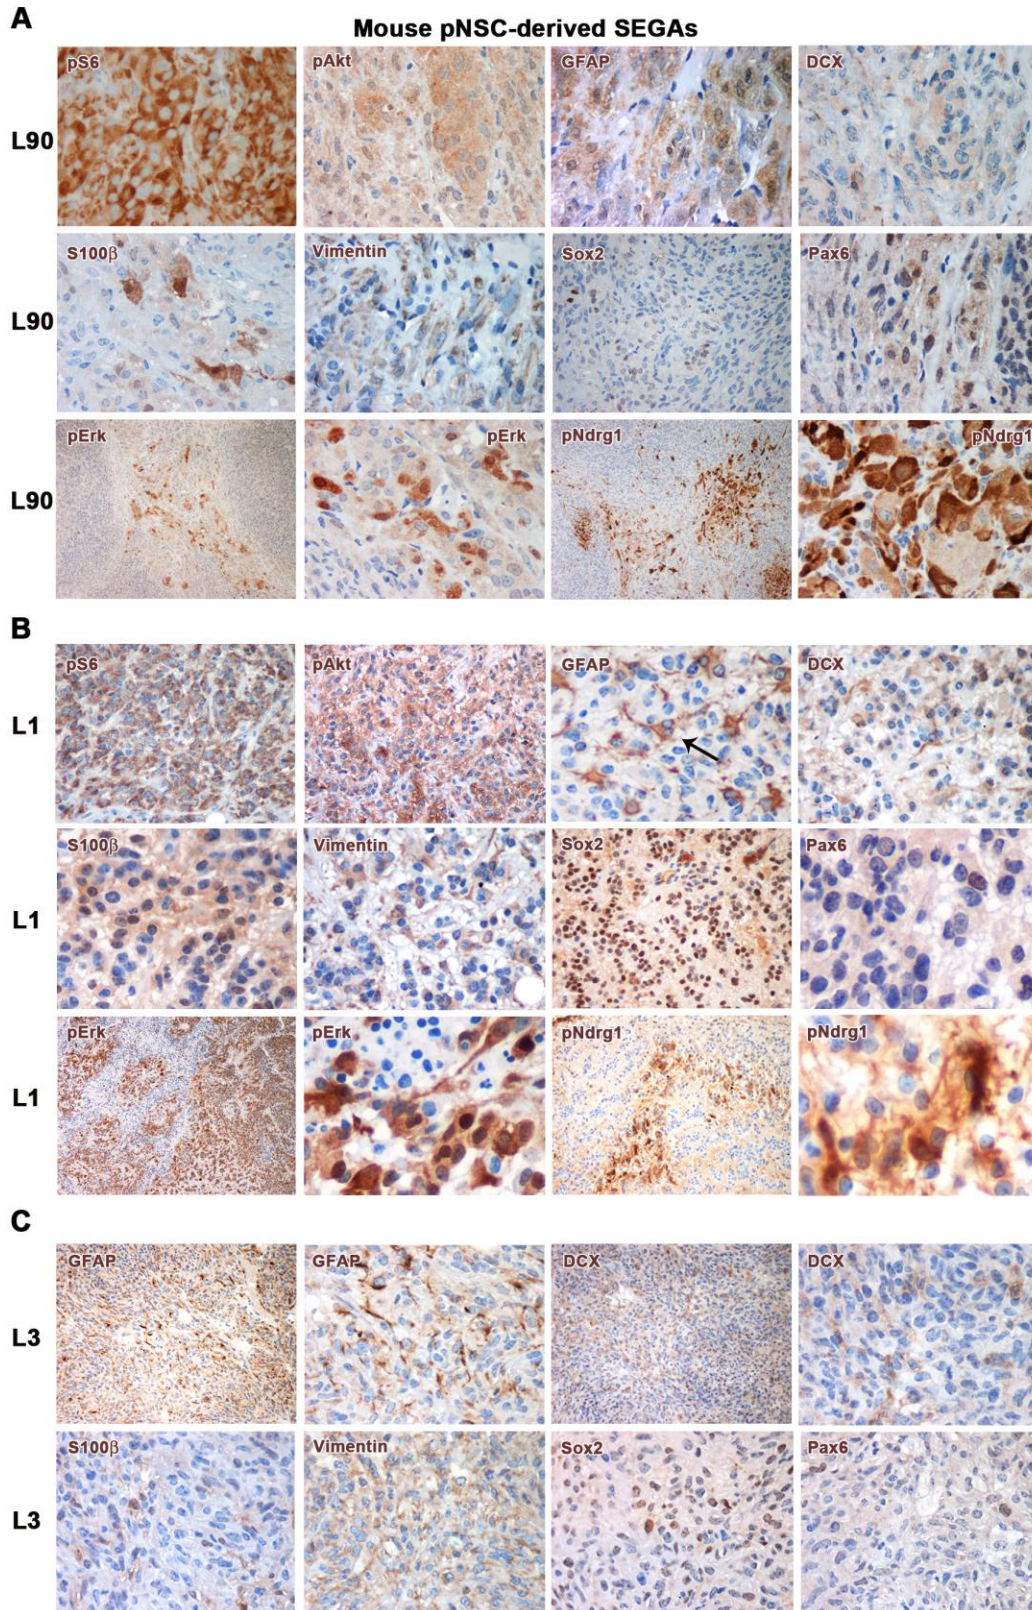

Tumors generated by the subcutaneous implantation of distinct pNSC lines (*i.e.* L90, L1 and L3) reproduced the heterogeneity in marker expression observed in human SEGA samples.

(A) Tumors generated by pNSC line L90 were characterized by the hyperactivation of pS6 and pAkt in most cells as well as by the expression of GFAP, DCX, S100 $\beta$ ,  $\square\square\square\square\square\square\square\square\square$ ox2 and Pax6 in subset of cells (IHC, magnification 600x; Sox2, 200x). They also hyperactivated pErk and pNdr1 in focal clusters of cells (100x and 600x).

(B) Tumors generated by pNSC line L1 strongly activated pS6 and pAkt in the majority of cells. GFAP, DCX, S100 $\beta$ ,  $\square\square\square\square\square\square\square\square\square$ ox2 and Pax6 were also retrieved in the majority of cells (Magnification 600x; Sox2, 200x). They hyperactivated pErk and pNdr1 in many cells (100x and 600x). Multinucleated cells were also detected (arrow in GFAP IHC).

(C) Tumors generated by pNSC line L3 expressed GFAP and DCX in most cells (100x and 600x). S100 $\beta$ ,  $\square\square\square\square\square\square\square\square\square$ ox2 and Pax6 were retrieved less frequently (600x).

**Supplemental Figure 7 – Genes expressed in mouse SEGAs are also upregulated in the corresponding human lesion.**

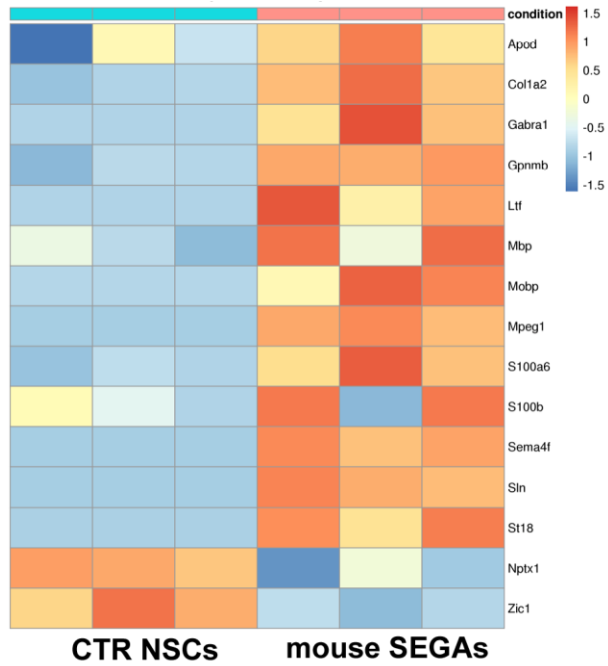

Heatmap showing 15 selected human SEGA-specific genes that were also increased/decreased in control pNSCs vs. mouse SEGAs, ranked based on their p value ( $p < 0.001$ ) and colored according to the scale blue=low and red=high ( $n=3$  independent biological replicate for each condition).



**Supplemental Table 1 – Demographic information of SEGA-bearing TSC patients.**

| <b>#</b> | <b><i>Internal reference</i></b> | <b><i>Age</i></b> | <b><i>Gender</i></b> |
|----------|----------------------------------|-------------------|----------------------|
| 1        | 15-B-02346                       | 10 y              | M                    |
| 2        | 12-B-03845                       | 4 m               | F                    |
| 3        | 11-B-01049                       | 13 y              | M                    |
| 4        | 11-B-00081                       | 1 y               | F                    |
| 5        | 10-B-03157                       | 11 y              | M                    |
| 6        | 08-B-00287                       | 13 y              | M                    |
| 7        | 06-B-03242                       | 19 y              | F                    |
| 8        | 11395-1997                       | 6 y               | F                    |
| 9        | 13568-2007                       | 9 y               | F                    |
| 10       | 15579-2001                       | 8 y               | F                    |
| 11       | 9225-2002                        | 9 y               | M                    |
| 12       | I-04-1727                        | 5 y               | M                    |
| 13       | I-13-3839                        | 3 y               | M                    |
| 14       | I-04-1268                        | 16 y              | M                    |
| 15       | I-04-1614                        | 8 y               | F                    |

**Gender:** 8 males (53%) and 7 females (47%)

**Median age at surgery:** 8.8 years (range 4 months-19 years)

**Supplemental Table 2 – Frequency of cells activating pS6, pAKT, pNDRG1, and pERK in TPN P10 and P15-17 pNSC-derived differentiated cultures.**

| % IR cells    | TPN P10 pNSC-derived end cells |                             | TPN P15-17 pNSC-derived end cells |                                               |
|---------------|--------------------------------|-----------------------------|-----------------------------------|-----------------------------------------------|
|               | <i>control</i>                 | <i>mutant</i>               | <i>control</i>                    | <i>mutant</i>                                 |
| <b>pS6</b>    | 16.5 ± 8.0                     | 98.7 ± 2.1**** <sup>a</sup> | 0                                 | 99.1 ± 1.1**** <sup>a</sup>                   |
| <b>pAkt</b>   | 0                              | 99.0 ± 0.4**** <sup>a</sup> | 0                                 | 95.9 ± 3.8**** <sup>a</sup>                   |
| <b>pNDRG1</b> | 0                              | 8.5 ± 4.2** <sup>a</sup>    | 0                                 | 22.5 ± 8.4**** <sup>a/</sup> ** <sup>b</sup>  |
| <b>pERK</b>   | 0                              | 41.3 ± 15.3*** <sup>a</sup> | 0                                 | 78.6 ± 19.5**** <sup>a/</sup> ** <sup>b</sup> |

Results for continuous variables were expressed as mean ± standard deviation. Two-group comparisons were performed with the independent samples' *t* test. P values <0.05 were considered statistically significant.

Statistical significance of the data is indicated as follows: \*: p< 0.05;

\*\*<sup>a</sup>: p< 0.01; \*\*\*<sup>a</sup>: p< 0.001; \*\*\*\*<sup>a</sup>: p< 0.0001.

<sup>a</sup>: *t* test comparing TPN P10 control vs mutant pNSC-derived progeny and TPN P15-17 control vs mutant pNSC-derived progeny.

<sup>b</sup>: *t* test comparing TPN P10 (SEN) mutant pNSC-derived progeny vs TPN P15-17 (SEGA) mutant pNSC-derived progeny.

**Supplemental Table 3 – Frequency of cells expressing progenitor- and lineage-specific markers in *TPN* P10 and P15-17 pNSC-derived differentiated cultures.**

| % IR cells    | <i>TPN</i> P10 pNSC-derived end cells |                          | <i>TPN</i> P15-17 pNSC-derived end cells |                             |
|---------------|---------------------------------------|--------------------------|------------------------------------------|-----------------------------|
|               | <i>control</i>                        | <i>mutant</i>            | <i>control</i>                           | <i>mutant</i>               |
| <b>Nestin</b> | 0                                     | 71.6 ± 17.1***           | 0                                        | 32.9 ± 13.1***              |
| <b>Tuj1</b>   | 9.0 ± 3.8                             | 11.6 ± 8.6 <sup>a</sup>  | 4.9 ± 2.8                                | 10.4 ± 11.7 <sup>b</sup>    |
| <b>GFAP</b>   | 89.5 ± 3.9                            | 73.1 ± 17.5 <sup>a</sup> | 90.0 ± 12.4                              | 43.4 ± 7.7 <sup>a</sup> *** |
| <b>GalC</b>   | 4.6 ± 1.8                             | 0***                     | 7.3 ± 2.5                                | 0***                        |

<sup>a</sup>: cells with highly aberrant morphology;

<sup>b</sup>: cells with aberrant morphology and colabeled for both Tuj1 and GFAP.

Results for continuous variables were expressed as mean ± standard deviation. Two-group comparisons were performed with the independent samples' *t* test. P values <0.05 were considered statistically significant. Statistical significance of the data is indicated as follows: \*: p< 0.05;

\*\*: p< 0.01; \*\*\*: p< 0.001; \*\*\*\*: p< 0.0001.

**Supplemental Table 4 – Frequency of cells expressing pS6 and Nestin in *TPN* P10 and P15-17 mutant pNSCs, before and after chronic treatment with rapamycin during differentiation.**

| <b>% IR cells</b> | <b>Vehicle-treated<br/><i>TPN</i> P10<br/>mutant pNSCs</b> | <b>Rapamycin-treated<br/><i>TPN</i> P10<br/>mutant pNSCs</b> | <b>Vehicle-treated<br/><i>TPN</i> P15-17<br/>mutant pNSCs</b> | <b>Rapamycin- treated<br/><i>TPN</i> P15-17<br/>mutant pNSCs</b> |
|-------------------|------------------------------------------------------------|--------------------------------------------------------------|---------------------------------------------------------------|------------------------------------------------------------------|
| <b>pS6</b>        | 94.6 ± 1.4                                                 | 0****                                                        | 95.3 ± 2.6                                                    | 0****                                                            |
| <b>Nestin</b>     | 78.8 ± 12.1                                                | 1.5 ± 1.7****                                                | 70.1 ± 9.1                                                    | 8.0 ± 3.1****                                                    |

Results for continuous variables were expressed as mean ± standard deviation. Two-group comparisons were performed with the independent samples' *t* test. P values <0.05 were considered statistically significant. Statistical significance of the data is indicated as follows: \*: p< 0.05; \*\*: p< 0.01; \*\*\*: p< 0.001; \*\*\*\*: p< 0.0001.

**Supplemental Table 5– Pathway analysis of genes differentially expressed between human SEGAs and normal control brain tissues by EnrichR.**

| <b>Genes upregulated in human SEGAs</b>   |                                                  |                |                         |                |                       |
|-------------------------------------------|--------------------------------------------------|----------------|-------------------------|----------------|-----------------------|
| <b>Pathway dataset</b>                    | <b>Name</b>                                      | <b>P value</b> | <b>Adjusted p value</b> | <b>Z-score</b> | <b>Combined score</b> |
| KEGG 2016                                 | PI3K-Akt signaling pathway_Homo sapiens_hsa04151 | 0.00004798     | 0.0003646               | -1.19          | 11.79                 |
| KEA 2015                                  | AKT1                                             | 0.003736       | 0.03822                 | - 0.96         | 5.38                  |
| <b>Genes downregulated in human SEGAs</b> |                                                  |                |                         |                |                       |
| LINCS 1000 Kinase Perturbations up        | AKT1_knockdown_96h_HEPG2                         | 1.568e-8       | 0.000003361             | -1.71          | 30.66                 |
| LINCS 1000 Kinase Perturbations up        | AKT2_knockdown_96h_HA1E                          | 3.705e-8       | 0.000005869             | -1.72          | 29.45                 |



**Supplemental List 1 – List of genes differentially expressed between mouse pNSC-derived SEGAs and control pNSCs.**

| <b>GeneID</b>        | <b>logFC</b> | <b>Pvalue</b> | <b>Pvalue_adj</b> |
|----------------------|--------------|---------------|-------------------|
| <b>Hba-a1</b>        | 9,517987544  | 2,18147E-27   | 7,71542E-24       |
| <b>Hbb-bs</b>        | 9,053374055  | 4,78977E-39   | 4,23511E-35       |
| <b>Myh4</b>          | 8,998526984  | 1,71119E-15   | 1,00378E-12       |
| <b>C1qa</b>          | 8,890042366  | 6,08216E-21   | 8,27361E-18       |
| <b>Ckm</b>           | 8,797720116  | 6,11869E-11   | 1,31955E-08       |
| <b>Ms4a6c</b>        | 8,789820056  | 1,29574E-11   | 3,41997E-09       |
| <b>Hbb-bt</b>        | 8,729601538  | 3,86371E-26   | 9,76082E-23       |
| <b>Ccl6</b>          | 8,69505819   | 3,29308E-11   | 7,86956E-09       |
| <b>RP23-361B11.3</b> | 8,669492484  | 1,07069E-10   | 2,25405E-08       |
| <b>Mag</b>           | 8,602800596  | 1,13244E-09   | 1,71163E-07       |
| <b>Mpeg1</b>         | 8,574140189  | 1,24312E-10   | 2,52683E-08       |
| <b>Aif1</b>          | 8,514237227  | 9,55028E-16   | 5,97048E-13       |
| <b>Fcgr3</b>         | 8,494005134  | 1,54901E-10   | 3,01019E-08       |
| <b>Gpmb</b>          | 8,442760463  | 4,77771E-61   | 8,4489E-57        |
| <b>Col15a1</b>       | 8,434983365  | 1,71857E-10   | 3,30339E-08       |
| <b>IMPDH</b>         | 8,427840562  | 1,81789E-09   | 2,52014E-07       |
| <b>Fam184b</b>       | 8,3241527    | 1,14815E-11   | 3,07634E-09       |
| <b>C1qc</b>          | 8,323474975  | 4,25351E-15   | 2,27937E-12       |
| <b>Xirp2</b>         | 8,323240827  | 9,791E-16     | 5,97048E-13       |
| <b>Kcne4</b>         | 8,283559046  | 1,95593E-09   | 2,64035E-07       |
| <b>Tnni2</b>         | 8,270782918  | 2,81231E-12   | 9,20979E-10       |
| <b>Lyz2</b>          | 8,230855708  | 1,02547E-21   | 1,81344E-18       |
| <b>Ctss</b>          | 8,229270406  | 5,90077E-26   | 1,30436E-22       |
| <b>Cd52</b>          | 8,216677317  | 1,54672E-09   | 2,18817E-07       |
| <b>Lims2</b>         | 8,189403047  | 3,63209E-11   | 8,45131E-09       |
| <b>Cthrc1</b>        | 8,178414735  | 1,25674E-09   | 1,88341E-07       |
| <b>Acan</b>          | 8,17202387   | 1,192E-08     | 1,33414E-06       |
| <b>Stab1</b>         | 8,137683312  | 2,68578E-09   | 3,46682E-07       |
| <b>Fyb</b>           | 8,120430143  | 2,14401E-09   | 2,87233E-07       |
| <b>Fam134b</b>       | 8,09049938   | 2,61593E-13   | 1,07582E-10       |
| <b>Ctla2a</b>        | 8,052395488  | 2,34979E-12   | 7,9911E-10        |
| <b>Lcp1</b>          | 8,043138786  | 2,37084E-14   | 1,16461E-11       |
| <b>Col14a1</b>       | 7,992642927  | 8,71602E-09   | 1,02076E-06       |
| <b>Fam198b</b>       | 7,955919462  | 2,3032E-12    | 7,98622E-10       |
| <b>Hcls1</b>         | 7,944046748  | 5,48737E-09   | 6,78592E-07       |
| <b>Mgp</b>           | 7,935111053  | 2,13475E-17   | 1,71595E-14       |
| <b>Neu4</b>          | 7,916099496  | 1,26141E-10   | 2,52823E-08       |
| <b>Gpihbp1</b>       | 7,914884384  | 3,38141E-08   | 3,30341E-06       |
| <b>Kcnj3</b>         | 7,909998574  | 5,60503E-08   | 5,05668E-06       |
| <b>Hp</b>            | 7,895774046  | 1,89508E-08   | 1,9598E-06        |
| <b>Tyrobp</b>        | 7,861150932  | 9,28801E-09   | 1,08059E-06       |
| <b>Acta1</b>         | 7,847734004  | 2,18628E-19   | 2,41638E-16       |
| <b>Ptprc</b>         | 7,834352568  | 1,20253E-08   | 1,33746E-06       |
| <b>Cdk15</b>         | 7,82594245   | 1,3469E-08    | 1,47942E-06       |
| <b>Ms4a6d</b>        | 7,806718499  | 1,13306E-08   | 1,28442E-06       |
| <b>Cd74</b>          | 7,801136746  | 3,27914E-08   | 3,23957E-06       |
| <b>Adgrl4</b>        | 7,787964304  | 1,68556E-08   | 1,78673E-06       |
| <b>Cybb</b>          | 7,774930138  | 1,75962E-15   | 1,00378E-12       |
| <b>Dct</b>           | 7,771970561  | 1,73609E-27   | 7,67527E-24       |
| <b>Col10a1</b>       | 7,716736384  | 2,34831E-08   | 2,38664E-06       |
| <b>Arsj</b>          | 7,69956143   | 2,23551E-08   | 2,28513E-06       |
| <b>Kcne3</b>         | 7,64971337   | 3,66932E-08   | 3,51339E-06       |

|               |             |             |             |
|---------------|-------------|-------------|-------------|
| Mrc1          | 7,630190685 | 2,61909E-12 | 8,73887E-10 |
| C3ar1         | 7,629690243 | 3,3998E-08  | 3,30341E-06 |
| Mb            | 7,629043946 | 3,33995E-08 | 3,28132E-06 |
| Cd83          | 7,620563613 | 5,7178E-10  | 9,36237E-08 |
| Lgi4          | 7,616629752 | 2,09841E-07 | 1,59154E-05 |
| 3110079O15Rik | 7,576750309 | 1,05845E-11 | 2,97106E-09 |
| Lcn2          | 7,567109151 | 6,35954E-08 | 5,6231E-06  |
| Pvalb         | 7,561031805 | 5,22562E-11 | 1,14086E-08 |
| Ms4a7         | 7,557189292 | 6,42648E-08 | 5,65403E-06 |
| Chst5         | 7,546958564 | 5,53974E-08 | 5,02383E-06 |
| Col2a1        | 7,530285155 | 4,42672E-10 | 7,45544E-08 |
| Mbp           | 7,498588856 | 5,09344E-11 | 1,14016E-08 |
| Gimap4        | 7,493493989 | 1,01241E-07 | 8,48504E-06 |
| Fmod          | 7,453084619 | 4,79498E-11 | 1,08711E-08 |
| Cfd           | 7,423267873 | 8,5627E-09  | 1,00949E-06 |
| Nov           | 7,419347971 | 1,58923E-07 | 1,25464E-05 |
| Inpp5d        | 7,385068091 | 1,17595E-07 | 9,62754E-06 |
| Enpp6         | 7,371199832 | 1,97393E-10 | 3,67442E-08 |
| Adgrd1        | 7,356855689 | 1,86693E-07 | 1,44802E-05 |
| Msr1          | 7,343846619 | 1,27241E-10 | 2,52823E-08 |
| Kcna1         | 7,331913322 | 1,81566E-07 | 1,41445E-05 |
| Ccl8          | 7,314487266 | 1,1174E-11  | 3,04001E-09 |
| 6330415B21Rik | 7,309720816 | 2,91249E-07 | 2,06018E-05 |
| Usp18         | 7,309492246 | 2,51669E-07 | 1,82398E-05 |
| Itgax         | 7,306751068 | 2,3152E-07  | 1,71306E-05 |
| Srgn          | 7,303483928 | 2,68986E-07 | 1,92581E-05 |
| Cdk18         | 7,282518253 | 2,24719E-07 | 1,67677E-05 |
| Tnnc2         | 7,279533534 | 5,19498E-11 | 1,14086E-08 |
| Arhgap45      | 7,276926971 | 3,16475E-07 | 2,21208E-05 |
| Atp2a1        | 7,273593548 | 3,81311E-07 | 2,5737E-05  |
| Sema4f        | 7,256518966 | 2,70145E-07 | 1,92631E-05 |
| Tacr1         | 7,254031698 | 1,18463E-06 | 6,6262E-05  |
| Alas2         | 7,254026026 | 2,3354E-07  | 1,7208E-05  |
| Fabp4         | 7,252485273 | 1,61045E-12 | 5,69583E-10 |
| Gent1         | 7,249058409 | 3,5592E-07  | 2,4208E-05  |
| Agtr1a        | 7,245289937 | 6,75033E-07 | 4,12419E-05 |
| Nfatc2        | 7,229844334 | 7,91219E-21 | 9,99423E-18 |
| Clec7a        | 7,219918654 | 5,08086E-07 | 3,27919E-05 |
| Itga8         | 7,21854284  | 3,80705E-07 | 2,5737E-05  |
| Fcna          | 7,217548824 | 3,40908E-07 | 2,34576E-05 |
| Trem2         | 7,209846858 | 3,31766E-07 | 2,29178E-05 |
| Syt4          | 7,189489675 | 3,39771E-09 | 4,354E-07   |
| Slpi          | 7,187157562 | 5,80607E-07 | 3,6539E-05  |
| Ifit1         | 7,184376975 | 5,54928E-07 | 3,51733E-05 |
| Fli1          | 7,172626987 | 1,04297E-08 | 1,19766E-06 |
| Neb           | 7,168207652 | 2,18145E-10 | 3,9364E-08  |
| Cdh5          | 7,154664348 | 8,33113E-10 | 1,29235E-07 |
| Cx3cr1        | 7,141849333 | 3,69466E-38 | 2,17788E-34 |
| Cla3a1        | 7,136008592 | 6,15275E-07 | 3,81773E-05 |
| Arap3         | 7,122696696 | 5,62301E-07 | 3,55133E-05 |
| Itgam         | 7,120189102 | 5,85561E-07 | 3,67201E-05 |
| B3gnt8        | 7,108959285 | 8,67451E-07 | 5,14747E-05 |
| Dnah5         | 7,088039458 | 1,28295E-06 | 7,04589E-05 |
| Cd33          | 7,074688694 | 7,65444E-07 | 4,61983E-05 |
| Klk9          | 7,054014684 | 1,13721E-06 | 6,42503E-05 |
| Nog           | 7,053684103 | 2,2652E-06  | 0,000110963 |
| Fcer1g        | 7,046549129 | 7,26109E-10 | 1,13633E-07 |

|                      |             |             |             |
|----------------------|-------------|-------------|-------------|
| <b>Drd1</b>          | 7,041243397 | 8,88635E-07 | 5,2208E-05  |
| <b>Hr</b>            | 7,03770807  | 2,62345E-11 | 6,72362E-09 |
| <b>Fgd2</b>          | 7,032232857 | 1,05297E-06 | 6,0261E-05  |
| <b>Gimap8</b>        | 7,017604484 | 2,10008E-06 | 0,00010432  |
| <b>C4b</b>           | 7,008999701 | 2,10764E-15 | 1,16474E-12 |
| <b>Jph2</b>          | 7,00059368  | 2,32115E-06 | 0,000113048 |
| <b>Spi1</b>          | 6,984901587 | 1,07788E-06 | 6,14878E-05 |
| <b>Klk8</b>          | 6,983771585 | 1,94111E-06 | 9,80957E-05 |
| <b>Galnt3</b>        | 6,978935439 | 1,59326E-06 | 8,41052E-05 |
| <b>Hck</b>           | 6,977025132 | 9,66331E-07 | 5,62125E-05 |
| <b>Slamf9</b>        | 6,974808821 | 1,55762E-06 | 8,29666E-05 |
| <b>Fam163a</b>       | 6,971612955 | 2,01074E-06 | 0,00010073  |
| <b>Icam2</b>         | 6,94691823  | 3,19938E-06 | 0,000145819 |
| <b>Myh2</b>          | 6,94295544  | 1,2239E-06  | 6,7848E-05  |
| <b>Gm15809</b>       | 6,936980925 | 1,55575E-06 | 8,29666E-05 |
| <b>Sla</b>           | 6,936264005 | 1,29999E-06 | 7,11734E-05 |
| <b>Cd72</b>          | 6,930588675 | 2,3856E-09  | 3,11989E-07 |
| <b>Folr2</b>         | 6,929677027 | 1,31407E-06 | 7,17225E-05 |
| <b>Lst1</b>          | 6,921091078 | 1,71463E-06 | 8,91807E-05 |
| <b>Adam23</b>        | 6,901001178 | 6,82195E-10 | 1,08049E-07 |
| <b>Rgs1</b>          | 6,894003057 | 1,66075E-06 | 8,68898E-05 |
| <b>Gm8995</b>        | 6,88153547  | 1,61135E-06 | 8,47997E-05 |
| <b>Gm553</b>         | 6,879380736 | 2,19865E-06 | 0,000108606 |
| <b>Fap</b>           | 6,878175962 | 2,66732E-06 | 0,000125449 |
| <b>Oasl2</b>         | 6,867566982 | 1,96938E-06 | 9,89391E-05 |
| <b>Laptm5</b>        | 6,863659079 | 1,28401E-17 | 1,08126E-14 |
| <b>Cd84</b>          | 6,859222953 | 1,79321E-06 | 9,21837E-05 |
| <b>I11b</b>          | 6,848229945 | 2,47414E-06 | 0,000118893 |
| <b>Gm43154</b>       | 6,82806703  | 2,89892E-06 | 0,00013385  |
| <b>RP23-417K23.1</b> | 6,821924878 | 4,6506E-06  | 0,000201572 |
| <b>Ninj2</b>         | 6,811081454 | 9,75926E-06 | 0,000374366 |
| <b>Myh1</b>          | 6,805788329 | 1,47194E-08 | 1,6008E-06  |
| <b>Gm38083</b>       | 6,79958987  | 4,36967E-06 | 0,00019262  |
| <b>Sema3d</b>        | 6,793661971 | 3,10995E-12 | 9,82078E-10 |
| <b>Clec10a</b>       | 6,786980363 | 3,18049E-06 | 0,000145333 |
| <b>Fcgr2b</b>        | 6,770430347 | 1,08432E-08 | 1,23711E-06 |
| <b>Zdhhc23</b>       | 6,764104563 | 5,43668E-06 | 0,000232974 |
| <b>Shisa9</b>        | 6,75349657  | 4,62923E-06 | 0,000201569 |
| <b>Abca8a</b>        | 6,751718843 | 1,57176E-07 | 1,25195E-05 |
| <b>Alox5ap</b>       | 6,748500066 | 1,52434E-09 | 2,17391E-07 |
| <b>Plekha6</b>       | 6,742708488 | 6,06574E-18 | 5,36332E-15 |
| <b>Erbp3</b>         | 6,721930873 | 8,84246E-10 | 1,35974E-07 |
| <b>Gm45496</b>       | 6,684722428 | 2,60981E-07 | 1,88375E-05 |
| <b>Irf5</b>          | 6,679585847 | 4,09073E-06 | 0,00018176  |
| <b>Tbxas1</b>        | 6,677099728 | 4,3896E-06  | 0,00019262  |
| <b>Emcn</b>          | 6,667878462 | 2,83286E-11 | 6,95782E-09 |
| <b>Gm44235</b>       | 6,653764881 | 9,29954E-06 | 0,000359853 |
| <b>Gata6</b>         | 6,652716591 | 5,44099E-06 | 0,000232974 |
| <b>Selplg</b>        | 6,651143983 | 6,79548E-06 | 0,000280119 |
| <b>Robo4</b>         | 6,647178349 | 6,65995E-06 | 0,000275819 |
| <b>Gm19253</b>       | 6,642146365 | 6,87489E-06 | 0,000282734 |
| <b>Arhgef15</b>      | 6,64036913  | 5,57583E-06 | 0,000236458 |
| <b>Gm15222</b>       | 6,639783052 | 6,05314E-06 | 0,000254261 |
| <b>Rac2</b>          | 6,620478907 | 6,97511E-06 | 0,00028619  |
| <b>Erp27</b>         | 6,614700153 | 9,49229E-06 | 0,000365712 |
| <b>Wnt2</b>          | 6,610927549 | 2,22587E-06 | 0,00010934  |
| <b>Nckap11</b>       | 6,606933043 | 8,05405E-09 | 9,65532E-07 |

|               |             |             |             |
|---------------|-------------|-------------|-------------|
| D130043K22Rik | 6,589119893 | 9,71923E-06 | 0,000373641 |
| Slc14a1       | 6,584359236 | 2,26607E-05 | 0,000746241 |
| Gm36932       | 6,582931482 | 8,17874E-06 | 0,000323917 |
| Gm43410       | 6,574418484 | 7,14012E-06 | 0,000291607 |
| Cldn11        | 6,569331109 | 8,44375E-09 | 1,00214E-06 |
| Acp5          | 6,568220987 | 1,1114E-05  | 0,000414643 |
| Gm13580       | 6,563866177 | 8,45486E-06 | 0,000330787 |
| Esam          | 6,557140133 | 5,83133E-12 | 1,69051E-09 |
| Krt18         | 6,55098981  | 1,04875E-05 | 0,000397134 |
| Ncf4          | 6,532803142 | 9,2008E-06  | 0,000357598 |
| Gpr65         | 6,527518053 | 2,79358E-08 | 2,80691E-06 |
| Hpgd          | 6,50736021  | 1,69584E-08 | 1,78673E-06 |
| Pnlip         | 6,501974429 | 9,93894E-08 | 8,36954E-06 |
| H2-Aa         | 6,500979807 | 1,41967E-09 | 2,05783E-07 |
| Lrg1          | 6,486199473 | 1,52205E-05 | 0,000540481 |
| Hey2          | 6,470161647 | 4,40645E-11 | 1,01199E-08 |
| Fcgr1         | 6,465550093 | 1,23763E-05 | 0,000450335 |
| Gm26569       | 6,460648528 | 1,95586E-05 | 0,000669003 |
| Islr          | 6,458711311 | 2,00266E-05 | 0,000681059 |
| Wfdc17        | 6,455796976 | 2,07914E-05 | 0,00070155  |
| Cd300lf       | 6,442905746 | 1,21639E-05 | 0,000445326 |
| C030013C21Rik | 6,442891226 | 1,67432E-05 | 0,000585153 |
| Cd37          | 6,435159131 | 1,81189E-05 | 0,000627034 |
| Nipal1        | 6,433523443 | 2,03512E-05 | 0,000688128 |
| Slfn2         | 6,42404014  | 1,36582E-05 | 0,000492921 |
| C1qb          | 6,410318966 | 2,82472E-11 | 6,95782E-09 |
| Ccr1          | 6,405970458 | 1,4191E-05  | 0,000508004 |
| Cnmd          | 6,397868931 | 4,29986E-05 | 0,001243883 |
| Was           | 6,396988554 | 1,66072E-05 | 0,00058155  |
| Pgr           | 6,393780959 | 2,86538E-05 | 0,000901627 |
| Prrt3         | 6,392876432 | 1,57326E-05 | 0,000555319 |
| Gm45852       | 6,391470926 | 1,72263E-05 | 0,000598488 |
| Evi2a         | 6,391470926 | 1,72263E-05 | 0,000598488 |
| Hapl1         | 6,385185659 | 7,14209E-07 | 4,32537E-05 |
| Ecel1         | 6,384940133 | 2,58111E-05 | 0,000825572 |
| Itgb4         | 6,381712543 | 1,94032E-05 | 0,000664973 |
| S100a6        | 6,375660955 | 2,66963E-17 | 2,0526E-14  |
| Tifab         | 6,367722906 | 2,26504E-05 | 0,000746241 |
| Gm34294       | 6,363593165 | 2,60776E-05 | 0,000830911 |
| Mndal         | 6,355986852 | 5,82607E-08 | 5,20345E-06 |
| Pld4          | 6,35405848  | 2,41832E-05 | 0,000786132 |
| Arhgap9       | 6,351968211 | 1,9189E-05  | 0,00066019  |
| Tgm2          | 6,351687366 | 5,87797E-18 | 5,36332E-15 |
| Fam196b       | 6,346812486 | 2,0209E-05  | 0,000684629 |
| Gm43275       | 6,341149371 | 1,84133E-05 | 0,000634739 |
| Ccl9          | 6,340848676 | 1,92992E-05 | 0,000662693 |
| Myog          | 6,339276617 | 2,19776E-05 | 0,000731924 |
| Naalad2       | 6,338377257 | 2,76718E-05 | 0,000875401 |
| Vat1l         | 6,327947609 | 2,08926E-10 | 3,84859E-08 |
| Wdfy4         | 6,326247823 | 2,15393E-05 | 0,000720041 |
| Hoxb9         | 6,31828468  | 2,47308E-06 | 0,000118893 |
| Tunar         | 6,308123745 | 5,84303E-05 | 0,001604475 |
| Gm13293       | 6,307512955 | 7,83152E-07 | 4,71063E-05 |
| Tmem52b       | 6,304760212 | 2,45984E-05 | 0,000796701 |
| Gm3086        | 6,304544942 | 3,86694E-05 | 0,001151686 |
| Gm45451       | 6,296382916 | 3,67453E-05 | 0,00110511  |
| Cd180         | 6,293015903 | 3,15335E-05 | 0,000978313 |

|               |             |             |             |
|---------------|-------------|-------------|-------------|
| Heyl          | 6,28880701  | 3,31108E-05 | 0,001016548 |
| Cxcl9         | 6,28880701  | 3,31108E-05 | 0,001016548 |
| Kcnq1         | 6,280414479 | 2,58166E-05 | 0,000825572 |
| Cdh1          | 6,280145661 | 1,12716E-07 | 9,34949E-06 |
| Gm26648       | 6,276246624 | 5,03463E-05 | 0,001422242 |
| Vav1          | 6,274905877 | 3,1637E-08  | 3,14309E-06 |
| Clec4a1       | 6,268646011 | 2,66962E-05 | 0,000847569 |
| Xlr3c         | 6,267991524 | 3,24291E-05 | 0,00100083  |
| 1700047M11Rik | 6,264697744 | 1,07612E-05 | 0,00040318  |
| Tmprss3       | 6,262158297 | 6,85717E-05 | 0,001820752 |
| Gm37736       | 6,260716372 | 3,50755E-05 | 0,001064965 |
| Gm43832       | 6,260672935 | 3,40149E-05 | 0,001042496 |
| Gm18709       | 6,252750254 | 4,65716E-05 | 0,00132407  |
| Postn         | 6,251454627 | 5,63315E-08 | 5,05668E-06 |
| Clec4a2       | 6,250178772 | 7,85797E-08 | 6,77855E-06 |
| Gm37061       | 6,228043998 | 3,41357E-05 | 0,001044386 |
| Il16          | 6,227830993 | 4,19235E-05 | 0,001219367 |
| Olfir843      | 6,222758155 | 5,2841E-05  | 0,00147388  |
| Flt4          | 6,217254143 | 3,79598E-05 | 0,001133921 |
| Cd5l          | 6,197166796 | 5,36935E-05 | 0,001492949 |
| Gm26523       | 6,18480054  | 4,0436E-05  | 0,001183885 |
| 5033426O07Rik | 6,183726066 | 8,83471E-05 | 0,002238296 |
| Ces5a         | 6,183035991 | 5,92257E-05 | 0,001611304 |
| Mustn1        | 6,173874475 | 3,6737E-05  | 0,00110511  |
| Clec5a        | 6,172782399 | 3,87837E-05 | 0,001151686 |
| Fam89a        | 6,167024982 | 1,25736E-08 | 1,3897E-06  |
| Lyl1          | 6,16331656  | 4,05028E-05 | 0,001183885 |
| Pirb          | 6,162602429 | 4,20968E-05 | 0,001222398 |
| Clec4a3       | 6,161490219 | 5,13084E-05 | 0,001440218 |
| RP23-104D6.8  | 6,161079084 | 5,20695E-05 | 0,001454656 |
| Myct1         | 6,16060736  | 4,9788E-05  | 0,001408723 |
| Mmrn2         | 6,156679415 | 1,22234E-13 | 5,27216E-11 |
| B230206H07Rik | 6,152479241 | 4,16062E-05 | 0,001212131 |
| Ighm          | 6,148433835 | 5,76402E-05 | 0,00159267  |
| Cd53          | 6,147691791 | 4,09909E-05 | 0,001196177 |
| St18          | 6,129144327 | 5,40547E-05 | 0,001500632 |
| Clec4n        | 6,121830503 | 2,43537E-08 | 2,46097E-06 |
| Gm26724       | 6,11767225  | 5,85469E-05 | 0,001605183 |
| Susd5         | 6,114258489 | 2,43494E-07 | 1,77931E-05 |
| Ly86          | 6,103451094 | 5,89451E-05 | 0,001606272 |
| Gm6025        | 6,102485396 | 0,000143706 | 0,003308983 |
| Adipoq        | 6,100926318 | 8,11769E-05 | 0,002098733 |
| Havcr2        | 6,100590051 | 5,09412E-05 | 0,001434465 |
| Trpv2         | 6,094150228 | 5,77586E-05 | 0,001593452 |
| Adgre1        | 6,089816369 | 4,77183E-07 | 3,11384E-05 |
| Klhl30        | 6,07112835  | 6,10388E-05 | 0,001647955 |
| Nrros         | 6,070232024 | 1,3176E-09  | 1,95801E-07 |
| Ptafr         | 6,069284847 | 6,97522E-05 | 0,001849321 |
| Arhgdib       | 6,06805484  | 5,54418E-12 | 1,63405E-09 |
| Kcnj15        | 6,065999286 | 8,32768E-05 | 0,002143619 |
| Gm37444       | 6,064822943 | 1,93118E-07 | 1,47202E-05 |
| Nnmt          | 6,063550332 | 7,96367E-05 | 0,002067982 |
| Pmel          | 6,061765087 | 9,27915E-05 | 0,002317691 |
| Pcnx2         | 6,053612244 | 6,36592E-05 | 0,001710864 |
| Gm16084       | 6,048092726 | 0,000100952 | 0,002494435 |
| A730045E13Rik | 6,040510257 | 8,94078E-05 | 0,002253224 |
| Gimap1        | 6,027480576 | 0,000144304 | 0,003318423 |



|               |             |             |             |
|---------------|-------------|-------------|-------------|
| Casp4         | 6,027000963 | 7,38001E-05 | 0,001942085 |
| Trpv4         | 6,01790764  | 2,503E-06   | 0,000119954 |
| 2410080102Rik | 6,015938384 | 7,07229E-05 | 0,001866663 |
| H2-Eb1        | 6,005764095 | 3,46138E-08 | 3,34486E-06 |
| Gm4951        | 6,001518872 | 0,000117011 | 0,002820439 |
| Plac8         | 5,996148686 | 8,41934E-07 | 5,01305E-05 |
| 2900037B21Rik | 5,993693464 | 1,80934E-06 | 9,24748E-05 |
| Lyve1         | 5,992776409 | 7,82322E-05 | 0,002034498 |
| Gm1627        | 5,979231258 | 0,000190681 | 0,004068653 |
| RP23-88C11.3  | 5,977908137 | 9,85794E-05 | 0,002448424 |
| Plekhs1       | 5,975305351 | 0,000132254 | 0,003105947 |
| Fermt3        | 5,974288913 | 8,90386E-05 | 0,002252587 |
| Gm12846       | 5,972554291 | 9,03799E-05 | 0,002270281 |
| Bcl2a1b       | 5,970720303 | 8,69864E-05 | 0,002210154 |
| Colec12       | 5,968610338 | 0,000128202 | 0,003026875 |
| Col3a1        | 5,966683274 | 8,27578E-13 | 3,1815E-10  |
| H2-DMb2       | 5,964327627 | 0,000100996 | 0,002494435 |
| Ccl4          | 5,959447739 | 8,93872E-05 | 0,002253224 |
| Des           | 5,957988753 | 2,83793E-10 | 4,96891E-08 |
| Vdr           | 5,957108898 | 6,1776E-07  | 3,81974E-05 |
| Tec           | 5,938571333 | 0,00010325  | 0,002531199 |
| Gm24876       | 5,926452339 | 0,000103343 | 0,002531199 |
| Ptger3        | 5,913725209 | 0,000202681 | 0,004268957 |
| P2ry13        | 5,908381059 | 0,000108968 | 0,002646963 |
| Slc38a4       | 5,901594753 | 0,000179375 | 0,003881289 |
| Matn4         | 5,897417258 | 4,12587E-08 | 3,90171E-06 |
| Gm12568       | 5,889497555 | 0,000145479 | 0,003332444 |
| Lox           | 5,889438534 | 6,97253E-17 | 4,93209E-14 |
| Parvg         | 5,885562112 | 0,000121698 | 0,002908244 |
| Cmah          | 5,882254346 | 0,000125569 | 0,002976619 |
| Gm44895       | 5,879521856 | 0,000124844 | 0,002963402 |
| Col6a2        | 5,878744421 | 1,47814E-08 | 1,6008E-06  |
| Clca3a2       | 5,875912393 | 0,000127193 | 0,003007064 |
| RP24-284M17.3 | 5,872618457 | 0,000142679 | 0,003295176 |
| Hoxc8         | 5,872558672 | 0,000146444 | 0,003350204 |
| Itgbl1        | 5,870594761 | 0,000126815 | 0,003002145 |
| Gm38125       | 5,856325446 | 0,000159762 | 0,003551386 |
| RP23-240M3.1  | 5,854362071 | 0,000279216 | 0,00543794  |
| Gm42496       | 5,853489611 | 0,000176158 | 0,003836423 |
| Slfn10-ps     | 5,843702954 | 0,000186938 | 0,004002195 |
| Gbp5          | 5,839752671 | 0,000134068 | 0,003137519 |
| 6720469O03Rik | 5,833811628 | 0,000140789 | 0,003280252 |
| Slc6a19       | 5,830055853 | 0,000276567 | 0,005410194 |
| Gpr34         | 5,828939116 | 0,000158548 | 0,003549067 |
| F13a1         | 5,826061468 | 1,51137E-08 | 1,61982E-06 |
| Kif19a        | 5,824991379 | 0,00016986  | 0,003736082 |
| Gm42484       | 5,824651283 | 0,000141963 | 0,003287905 |
| Dock2         | 5,82459175  | 0,000145004 | 0,003330202 |
| Gm24292       | 5,820064644 | 0,000209912 | 0,004372295 |
| Iigp1         | 5,814672789 | 8,00259E-06 | 0,000319453 |
| Tnfaip812     | 5,812661348 | 0,000156666 | 0,003529285 |
| Mmp3          | 5,810391766 | 0,000169794 | 0,003736082 |
| Chil1         | 5,810029045 | 0,000167467 | 0,003701853 |
| Gm44898       | 5,808969761 | 0,000302577 | 0,005778377 |
| P4ha3         | 5,805122169 | 4,00275E-07 | 2,69143E-05 |
| Il1rn         | 5,802557579 | 0,000152215 | 0,003459861 |
| Ch25h         | 5,798637489 | 0,000174981 | 0,003820195 |

|               |             |             |             |
|---------------|-------------|-------------|-------------|
| Inpp5j        | 5,798300107 | 0,000174322 | 0,003817613 |
| Samsn1        | 5,797509606 | 0,000159857 | 0,003551386 |
| Tmem132b      | 5,791371628 | 0,000202902 | 0,004268957 |
| My1l          | 5,789303924 | 0,000180229 | 0,003891532 |
| Pigz          | 5,788961279 | 0,000310717 | 0,005908301 |
| Abcb1a        | 5,784162966 | 0,00020106  | 0,004252518 |
| Ctla2b        | 5,783668197 | 0,000169724 | 0,003736082 |
| Krt24         | 5,78108545  | 0,0001844   | 0,003971892 |
| Sln           | 5,779758131 | 0,000174431 | 0,003817613 |
| Myo18b        | 5,778153033 | 0,000168252 | 0,003714567 |
| Npas2         | 5,772373583 | 0,000179221 | 0,003881289 |
| Rit2          | 5,772137726 | 0,000202909 | 0,004268957 |
| Gm26518       | 5,771343441 | 0,000219434 | 0,004508861 |
| Arhgap25      | 5,769344715 | 0,000186539 | 0,003998487 |
| Ctse          | 5,760383701 | 0,000178154 | 0,003865606 |
| Gm25524       | 5,758688208 | 0,000224717 | 0,004588799 |
| 9330175E14Rik | 5,753579034 | 0,000198295 | 0,004201148 |
| Clec12a       | 5,75167387  | 0,000185776 | 0,003991806 |
| C5ar1         | 5,750998893 | 0,000182673 | 0,00393949  |
| Rbpjl         | 5,749168036 | 0,000257769 | 0,005116043 |
| Slc16a14      | 5,743971521 | 0,00018925  | 0,004046791 |
| Glt28d2       | 5,742704521 | 0,000214764 | 0,004441969 |
| Gm26797       | 5,741090941 | 0,000195746 | 0,004160535 |
| Msc           | 5,739022851 | 0,000203019 | 0,004268957 |
| Gm38312       | 5,736120157 | 0,000212949 | 0,004412343 |
| Nxpe5         | 5,732609175 | 0,000282579 | 0,005473301 |
| Gm38033       | 5,728203325 | 0,00023755  | 0,004773672 |
| Gprin3        | 5,71791401  | 0,000217056 | 0,004478908 |
| Col8a1        | 5,712399422 | 1,38414E-09 | 2,0229E-07  |
| Gm26813       | 5,711052094 | 0,000424991 | 0,007676751 |
| Otos          | 5,706107633 | 0,000255086 | 0,005074168 |
| Hoxb3os       | 5,699417383 | 0,000316303 | 0,005983179 |
| Retnla        | 5,696058775 | 0,000285275 | 0,005519472 |
| Gm10701       | 5,683651635 | 0,00030699  | 0,005856331 |
| Pkp3          | 5,68064191  | 6,6762E-05  | 0,001780723 |
| Tlr13         | 5,678459654 | 0,000240013 | 0,004817705 |
| Tiel          | 5,678252282 | 0,000250092 | 0,00500297  |
| Frm3p3        | 5,678223284 | 0,000282212 | 0,00547219  |
| 1700031A10Rik | 5,675694212 | 0,000289546 | 0,005589805 |
| Pecam1        | 5,67333689  | 1,14535E-10 | 2,38287E-08 |
| Clvs1         | 5,66549803  | 0,000455294 | 0,008108173 |
| Edn1          | 5,660232242 | 0,000265898 | 0,005247925 |
| Sncg          | 5,658427051 | 0,000401656 | 0,007330114 |
| Myo1f         | 5,657998028 | 0,000258349 | 0,005116065 |
| Pilra         | 5,65507418  | 0,000277318 | 0,005412911 |
| B930025P03Rik | 5,654907674 | 0,000326384 | 0,006153282 |
| Smpx          | 5,649446156 | 8,95079E-07 | 5,24125E-05 |
| Rps6kl1       | 5,647284441 | 7,52394E-08 | 6,52222E-06 |
| Gm44799       | 5,643530644 | 0,000387893 | 0,007143999 |
| Il10ra        | 5,633691938 | 0,000299012 | 0,005722656 |
| Slc25a48      | 5,632007586 | 0,000279941 | 0,005446061 |
| Spn           | 5,63112163  | 0,00037018  | 0,006876326 |
| Sdpr          | 5,622985927 | 3,60698E-14 | 1,67857E-11 |
| Gm28792       | 5,62055118  | 0,00036574  | 0,006815324 |
| S100a9        | 5,60998712  | 0,000394913 | 0,007214508 |
| Olfcr373      | 5,601812721 | 0,000446297 | 0,00800435  |
| Clca2         | 5,601137625 | 0,000316347 | 0,005983179 |

|                      |             |             |             |
|----------------------|-------------|-------------|-------------|
| <b>Fxd3</b>          | 5,601124053 | 0,000389287 | 0,007156082 |
| <b>Gm37885</b>       | 5,590800743 | 0,000355262 | 0,006648098 |
| <b>Serpina3n</b>     | 5,590528697 | 5,63857E-06 | 0,000237977 |
| <b>Mybpc3</b>        | 5,585558858 | 0,000349601 | 0,006556037 |
| <b>Ikzf1</b>         | 5,584181488 | 5,34279E-08 | 4,92093E-06 |
| <b>Cd300lg</b>       | 5,577075415 | 0,000380517 | 0,007024082 |
| <b>Gm42497</b>       | 5,576648307 | 0,000408084 | 0,007409189 |
| <b>Fes</b>           | 5,566256913 | 0,000404222 | 0,007369344 |
| <b>9630001P10Rik</b> | 5,56213991  | 0,000467774 | 0,008255608 |
| <b>Gm2366</b>        | 5,557558432 | 0,000457709 | 0,008134796 |
| <b>Gm38069</b>       | 5,555727221 | 0,000503145 | 0,008660917 |
| <b>Ttn</b>           | 5,555107872 | 2,32382E-21 | 3,42454E-18 |
| <b>Gm36028</b>       | 5,554901823 | 0,000501605 | 0,00865732  |
| <b>Fxd5</b>          | 5,552752538 | 5,6071E-10  | 9,26691E-08 |
| <b>A430034D21Rik</b> | 5,551161972 | 0,000677413 | 0,011000336 |
| <b>Saa3</b>          | 5,548406722 | 7,43102E-06 | 0,00029934  |
| <b>Mrvi1</b>         | 5,54515117  | 0,000437246 | 0,007873996 |
| <b>Ucn2</b>          | 5,54181429  | 0,000456163 | 0,008115471 |
| <b>Ly6a</b>          | 5,541081736 | 1,17159E-06 | 6,57724E-05 |
| <b>Gm25514</b>       | 5,540201905 | 0,000447081 | 0,00800435  |
| <b>1810011H11Rik</b> | 5,540141814 | 0,000388226 | 0,007143999 |
| <b>Vwf</b>           | 5,539887788 | 1,8409E-09  | 2,52361E-07 |
| <b>Ifi47</b>         | 5,536582089 | 0,000464524 | 0,008206428 |
| <b>Gm43614</b>       | 5,534771412 | 2,82232E-05 | 0,000891249 |
| <b>D130051D11Rik</b> | 5,532171769 | 0,000406327 | 0,007392483 |
| <b>Chdh</b>          | 5,529457485 | 0,000434199 | 0,00782709  |
| <b>Gpr183</b>        | 5,527797365 | 0,000461816 | 0,008174921 |
| <b>Fstl5</b>         | 5,527435105 | 0,000664925 | 0,010857366 |
| <b>Gm42765</b>       | 5,526862093 | 0,000495714 | 0,008594313 |
| <b>Sec14l4</b>       | 5,518134517 | 1,00691E-05 | 0,000384582 |
| <b>Capn3</b>         | 5,51401804  | 0,000459462 | 0,0081414   |
| <b>Gm37138</b>       | 5,511367631 | 0,000561842 | 0,009516876 |
| <b>Gm9925</b>        | 5,510590566 | 0,000491259 | 0,008564003 |
| <b>Npy</b>           | 5,50955791  | 2,87024E-10 | 4,9762E-08  |
| <b>Gm5833</b>        | 5,503254323 | 0,000594888 | 0,009962124 |
| <b>Eva1a</b>         | 5,499408183 | 0,000469641 | 0,008263819 |
| <b>Myoz1</b>         | 5,498643405 | 0,000504589 | 0,008663248 |
| <b>Tal1</b>          | 5,497990764 | 0,000503473 | 0,008660917 |
| <b>RP24-365A12.2</b> | 5,49744257  | 0,000601417 | 0,010061042 |
| <b>Gm5357</b>        | 5,496859113 | 0,000469162 | 0,00826361  |
| <b>Gng3</b>          | 5,488307725 | 3,48567E-07 | 2,37995E-05 |
| <b>Gm37290</b>       | 5,48710401  | 0,000485955 | 0,008508541 |
| <b>Gdnf</b>          | 5,485724837 | 1,49959E-05 | 0,000533575 |
| <b>C1qtnf2</b>       | 5,473857029 | 0,000623486 | 0,010294791 |
| <b>Tmem74bos</b>     | 5,473339167 | 0,000524286 | 0,008992695 |
| <b>Cyp4f18</b>       | 5,471352714 | 0,000494674 | 0,008588602 |
| <b>4930404I05Rik</b> | 5,46585235  | 0,000845286 | 0,013135358 |
| <b>Gm32200</b>       | 5,461989226 | 0,000578871 | 0,009743192 |
| <b>Ushbp1</b>        | 5,454541834 | 1,18303E-05 | 0,000435849 |
| <b>Asic4</b>         | 5,454519921 | 0,000815952 | 0,012791924 |
| <b>Gm45828</b>       | 5,44976041  | 0,000573097 | 0,009694612 |
| <b>Gm43190</b>       | 5,447654933 | 0,000528034 | 0,009039456 |
| <b>Gm45163</b>       | 5,440518654 | 0,000907884 | 0,013788438 |
| <b>Gm20443</b>       | 5,439164357 | 0,000580994 | 0,009766451 |
| <b>AW112010</b>      | 5,438861491 | 0,000540797 | 0,009231136 |
| <b>Anpep</b>         | 5,428586418 | 0,000677242 | 0,011000336 |
| <b>Gm44021</b>       | 5,425751798 | 4,39203E-05 | 0,001267026 |

|                      |             |             |             |
|----------------------|-------------|-------------|-------------|
| <b>Stoml3</b>        | 5,422870238 | 3,47031E-05 | 0,001056263 |
| <b>Gdf10</b>         | 5,421756203 | 0,000848991 | 0,013166852 |
| <b>RP24-211L21.1</b> | 5,418869368 | 0,000945417 | 0,014168438 |
| <b>Onecut1</b>       | 5,41824775  | 0,000655054 | 0,010755775 |
| <b>Gpr35</b>         | 5,409723016 | 3,51094E-05 | 0,001064965 |
| <b>E330021D16Rik</b> | 5,406618175 | 1,06911E-05 | 0,000402258 |
| <b>5033404E19Rik</b> | 5,39846889  | 0,00062014  | 0,010276881 |
| <b>Apobec2</b>       | 5,3955031   | 0,000818352 | 0,012818185 |
| <b>Ccdc88b</b>       | 5,392606257 | 0,000623064 | 0,010294791 |
| <b>Tmprss2</b>       | 5,385528358 | 0,000357239 | 0,006678026 |
| <b>Tmem26</b>        | 5,384871481 | 9,49633E-13 | 3,49861E-10 |
| <b>Ccr6</b>          | 5,383458878 | 0,000636005 | 0,010481932 |
| <b>Gm10376</b>       | 5,381094941 | 0,000757207 | 0,01208524  |
| <b>Kcnh5</b>         | 5,378827587 | 0,000663848 | 0,010849812 |
| <b>A730017C20Rik</b> | 5,378738952 | 3,21867E-12 | 9,98578E-10 |
| <b>1700084J12Rik</b> | 5,378012576 | 4,22858E-05 | 0,001225871 |
| <b>Olfr1448</b>      | 5,374559922 | 0,000798801 | 0,012601241 |
| <b>Lrrc3</b>         | 5,374495187 | 0,000839918 | 0,01308249  |
| <b>Clec4b1</b>       | 5,37402921  | 0,000702906 | 0,011351773 |
| <b>1700030J22Rik</b> | 5,37206953  | 0,000662747 | 0,010848945 |
| <b>Gm26632</b>       | 5,370091848 | 3,88802E-05 | 0,001151686 |
| <b>Dok2</b>          | 5,369458703 | 0,000669542 | 0,010902568 |
| <b>Tfap2c</b>        | 5,367757404 | 0,00123341  | 0,017174505 |
| <b>Col1a2</b>        | 5,362008647 | 8,20565E-19 | 8,53581E-16 |
| <b>Gm12090</b>       | 5,361470432 | 0,000939181 | 0,01411086  |
| <b>6530403H02Rik</b> | 5,355073369 | 0,000825418 | 0,012917425 |
| <b>Gm38284</b>       | 5,353667417 | 0,000906648 | 0,013786043 |
| <b>Adamts18</b>      | 5,352376442 | 0,000918355 | 0,013904268 |
| <b>Oas1b</b>         | 5,350283095 | 0,000744716 | 0,011907369 |
| <b>Gm37848</b>       | 5,349665072 | 7,75497E-05 | 0,002022698 |
| <b>Cyp26b1</b>       | 5,349659909 | 3,75764E-13 | 1,51023E-10 |
| <b>Ncf2</b>          | 5,341582893 | 0,000760117 | 0,012119502 |
| <b>Sh3tc2</b>        | 5,340673489 | 1,25367E-06 | 6,91259E-05 |
| <b>Mlana</b>         | 5,335093754 | 0,001264641 | 0,017343913 |
| <b>Il7r</b>          | 5,333626764 | 0,000877337 | 0,013444388 |
| <b>Defb13</b>        | 5,330756663 | 0,000850291 | 0,013166852 |
| <b>Slamf7</b>        | 5,329050495 | 0,000998412 | 0,014762479 |
| <b>Gm5766</b>        | 5,327634662 | 0,000843702 | 0,013122271 |
| <b>Tnnt3</b>         | 5,325950946 | 2,71855E-06 | 0,000127519 |
| <b>Cacna1s</b>       | 5,324027505 | 0,000859295 | 0,013271418 |
| <b>Ehf</b>           | 5,321118396 | 0,001385793 | 0,018370593 |
| <b>Gm11483</b>       | 5,319178664 | 0,000812874 | 0,012766306 |
| <b>5830416I19Rik</b> | 5,319008075 | 0,001305728 | 0,017693872 |
| <b>Gm17826</b>       | 5,314325739 | 0,000861457 | 0,013292259 |
| <b>Dio3</b>          | 5,309701093 | 0,001028417 | 0,015080041 |
| <b>Gm10101</b>       | 5,308111751 | 0,000868255 | 0,013363113 |
| <b>Uba7</b>          | 5,307810455 | 0,000920484 | 0,013924591 |
| <b>S100a8</b>        | 5,302657869 | 3,45364E-05 | 0,001054502 |
| <b>Gm43769</b>       | 5,302651244 | 0,000879556 | 0,013466728 |
| <b>Rpl23a-ps1</b>    | 5,297943246 | 0,001348006 | 0,018083773 |
| <b>Slc46a2</b>       | 5,2968997   | 0,00136007  | 0,018179502 |
| <b>Hspb7</b>         | 5,295682904 | 0,000969279 | 0,014461173 |
| <b>Gm22910</b>       | 5,295545778 | 0,001342288 | 0,018048751 |
| <b>C3</b>            | 5,294058571 | 5,53141E-08 | 5,02383E-06 |
| <b>Gm45338</b>       | 5,293458823 | 0,001102699 | 0,0159445   |
| <b>Gm23445</b>       | 5,28989634  | 0,001333325 | 0,017944081 |
| <b>Gm4034</b>        | 5,28834302  | 0,000977915 | 0,014534754 |

|                      |             |             |             |
|----------------------|-------------|-------------|-------------|
| <b>Pdzk1</b>         | 5,28834302  | 0,000977915 | 0,014534754 |
| <b>Csf2rb</b>        | 5,287989536 | 9,25893E-06 | 0,000359068 |
| <b>RP23-35O24.3</b>  | 5,287937894 | 0,001357975 | 0,018174629 |
| <b>Mme</b>           | 5,287150492 | 2,48884E-05 | 0,000803728 |
| <b>Gm44229</b>       | 5,286834636 | 0,001052795 | 0,01536108  |
| <b>Gm19096</b>       | 5,283691505 | 0,00102493  | 0,015041378 |
| <b>Xaf1</b>          | 5,282049184 | 0,000938483 | 0,01411086  |
| <b>Tnxb</b>          | 5,2788276   | 0,000884536 | 0,013519557 |
| <b>Gm43188</b>       | 5,278513968 | 0,00093236  | 0,01404417  |
| <b>Dnah6</b>         | 5,277862503 | 0,000968008 | 0,014461173 |
| <b>Gm15149</b>       | 5,277446953 | 0,001190126 | 0,016743194 |
| <b>Gm7494</b>        | 5,271256574 | 0,000894806 | 0,013641156 |
| <b>Mylk2</b>         | 5,268035354 | 0,000931313 | 0,01404417  |
| <b>Rgs5</b>          | 5,266875516 | 1,48354E-21 | 2,385E-18   |
| <b>Gm37474</b>       | 5,265820798 | 0,00115023  | 0,016390548 |
| <b>RP23-381H23.2</b> | 5,26192658  | 0,001007268 | 0,014868547 |
| <b>Slc12a1</b>       | 5,25345109  | 0,001223098 | 0,01705879  |
| <b>Mmp23</b>         | 5,252555531 | 0,00020735  | 0,004334253 |
| <b>Gdf3</b>          | 5,251665172 | 0,001228418 | 0,017118478 |
| <b>F5</b>            | 5,247670242 | 0,000503415 | 0,008660917 |
| <b>Ccr2</b>          | 5,246513939 | 2,10597E-07 | 1,59154E-05 |
| <b>Lgals3</b>        | 5,239376689 | 4,84743E-15 | 2,52124E-12 |
| <b>Axdnd1</b>        | 5,234595938 | 0,001170612 | 0,016587423 |
| <b>Gm43244</b>       | 5,234595938 | 0,001170612 | 0,016587423 |
| <b>Cntnap5a</b>      | 5,231031374 | 0,001588328 | 0,020468509 |
| <b>Vstm2a</b>        | 5,231031374 | 0,001588328 | 0,020468509 |
| <b>Gm42941</b>       | 5,229133063 | 0,001167212 | 0,016587423 |
| <b>E230001N04Rik</b> | 5,228709692 | 0,001016736 | 0,014985307 |
| <b>Serpind1</b>      | 5,228358742 | 0,001508895 | 0,019707018 |
| <b>Hcn2</b>          | 5,225836506 | 0,001023397 | 0,01503883  |
| <b>A430048G15Rik</b> | 5,2253093   | 0,001117558 | 0,016091303 |
| <b>RP24-282C4.6</b>  | 5,2253093   | 0,001117558 | 0,016091303 |
| <b>Ebi3</b>          | 5,224981018 | 0,00122317  | 0,01705879  |
| <b>Plp1</b>          | 5,224106027 | 5,35369E-06 | 0,000230914 |
| <b>Myo1g</b>         | 5,218774032 | 0,001056606 | 0,015403978 |
| <b>Pde8b</b>         | 5,216511082 | 1,45962E-06 | 7,86948E-05 |
| <b>Dkk2</b>          | 5,215528638 | 4,60495E-05 | 0,001311334 |
| <b>Gm45768</b>       | 5,214697252 | 2,27796E-11 | 5,92402E-09 |
| <b>9430092D12Rik</b> | 5,20223601  | 0,001132639 | 0,01621829  |
| <b>C130026I21Rik</b> | 5,201319665 | 0,001412117 | 0,018649642 |
| <b>Gm11451</b>       | 5,200998568 | 1,15193E-05 | 0,000427956 |
| <b>Mroh3</b>         | 5,200985842 | 0,001320597 | 0,017786314 |
| <b>Medag</b>         | 5,195680776 | 5,80858E-05 | 0,001599984 |
| <b>Slc4a10</b>       | 5,195585134 | 0,001168873 | 0,016587423 |
| <b>BC055402</b>      | 5,195498638 | 0,001408725 | 0,018618757 |
| <b>Gm42537</b>       | 5,195357226 | 0,001470297 | 0,019274083 |
| <b>Samd12</b>        | 5,194518959 | 0,001280418 | 0,017476592 |
| <b>Phf11d</b>        | 5,188532901 | 0,001363924 | 0,018205785 |
| <b>Gm5096</b>        | 5,188025534 | 0,001181609 | 0,016676439 |
| <b>Adap1</b>         | 5,187498017 | 2,87141E-05 | 0,000901918 |
| <b>Fam122c</b>       | 5,185995519 | 0,001289154 | 0,01754996  |
| <b>Gm8802</b>        | 5,180407303 | 0,001295773 | 0,017599425 |
| <b>Slc6a13</b>       | 5,180407303 | 0,001295773 | 0,017599425 |
| <b>Gm28342</b>       | 5,179856867 | 0,001238566 | 0,017183464 |
| <b>Osr1</b>          | 5,177136242 | 0,001445478 | 0,019033384 |
| <b>Gm26822</b>       | 5,175994728 | 0,001390921 | 0,018410966 |
| <b>Nr1h4</b>         | 5,174253006 | 0,001314743 | 0,017748029 |

|               |             |             |             |
|---------------|-------------|-------------|-------------|
| Gm37969       | 5,173117195 | 0,001239201 | 0,017183464 |
| Hmx3          | 5,171196656 | 0,001318888 | 0,017786314 |
| Higd1b        | 5,169510905 | 4,47575E-05 | 0,00128489  |
| A230083G16Rik | 5,169454558 | 0,001299971 | 0,017642898 |
| Gm42939       | 5,165454115 | 0,001534429 | 0,019893578 |
| Tecta         | 5,165036319 | 0,00012949  | 0,003053211 |
| Gm37729       | 5,163803663 | 0,001897057 | 0,023200095 |
| Gm13528       | 5,163220148 | 0,001911301 | 0,02330996  |
| Gm38376       | 5,161745027 | 0,001248629 | 0,017210254 |
| Cacng1        | 5,160519061 | 0,001259674 | 0,017321986 |
| Zdbf2         | 5,1595686   | 0,001898357 | 0,023200095 |
| RP23-408K7.1  | 5,159467948 | 0,001262757 | 0,017337424 |
| Gm45235       | 5,157329114 | 0,001358678 | 0,018174629 |
| Rspo4         | 5,156448789 | 0,002070352 | 0,024571881 |
| Lepr          | 5,156448789 | 0,002070352 | 0,024571881 |
| Ltbp2         | 5,155637955 | 0,001933523 | 0,023483809 |
| Gm8425        | 5,155298941 | 0,001589657 | 0,020468509 |
| Gm26728       | 5,154686454 | 0,001282776 | 0,017476592 |
| Fam167b       | 5,151689347 | 1,11254E-07 | 9,28029E-06 |
| Ppnr          | 5,149962869 | 0,001281447 | 0,017476592 |
| Gm2447        | 5,149202087 | 0,001369913 | 0,018214698 |
| A4galt        | 5,149202087 | 0,001369913 | 0,018214698 |
| Col6a6        | 5,145486105 | 0,00130197  | 0,017656472 |
| Oxt           | 5,13922275  | 0,001620784 | 0,020724471 |
| Gm28874       | 5,13922275  | 0,001620784 | 0,020724471 |
| Adcy4         | 5,138278649 | 0,001630988 | 0,02080501  |
| Cav3          | 5,137905434 | 0,001556063 | 0,020129789 |
| Atxn711os2    | 5,133032619 | 0,002003558 | 0,024004691 |
| Gm37593       | 5,132667007 | 0,001631005 | 0,02080501  |
| Ltc4s         | 5,128811964 | 0,001559774 | 0,020157775 |
| Gm36993       | 5,127385351 | 0,002074258 | 0,024601724 |
| D130040H23Rik | 5,12677823  | 0,001367184 | 0,018205785 |
| RP24-255E19.4 | 5,12677823  | 0,001367184 | 0,018205785 |
| Olfr1122      | 5,125393001 | 0,002110371 | 0,024929732 |
| Bmf           | 5,124667753 | 4,73309E-05 | 0,0013435   |
| Lilrb4a       | 5,122317912 | 0,00151406  | 0,019745307 |
| Slc8a1        | 5,11416913  | 0,001653701 | 0,020978516 |
| Actg2         | 5,113487614 | 0,001489186 | 0,0194928   |
| Gm37151       | 5,110227491 | 0,001689038 | 0,021304522 |
| Gm45758       | 5,109853086 | 0,001524942 | 0,01982873  |
| Sez6l2        | 5,109560519 | 0,002133018 | 0,025113376 |
| Wdfy2         | 5,108450806 | 0,001560506 | 0,020157775 |
| Gm42767       | 5,106950444 | 0,001797943 | 0,02228088  |
| Syt5          | 5,106700921 | 0,001468827 | 0,019269088 |
| Cd300c2       | 5,105994751 | 0,001517282 | 0,01977274  |
| Trim29        | 5,102196388 | 0,000236136 | 0,004761485 |
| 9430087B13Rik | 5,100536591 | 0,001982458 | 0,023816427 |
| Tnfrsf1b      | 5,097841033 | 0,000103161 | 0,002531199 |
| Gm7924        | 5,097675817 | 0,001592664 | 0,020468509 |
| Dok3          | 5,097675817 | 0,001592664 | 0,020468509 |
| Ifi207        | 5,094360737 | 0,001604929 | 0,020566355 |
| 5430427O19Rik | 5,091894088 | 0,001639875 | 0,020892638 |
| 4930589P08Rik | 5,091478246 | 0,001602044 | 0,020544263 |
| Ifit3         | 5,091159501 | 6,87551E-09 | 8,32784E-07 |
| Gm26823       | 5,088518584 | 0,001793564 | 0,022257813 |
| Spon2         | 5,088264044 | 0,001534417 | 0,019893578 |
| Naip2         | 5,088264044 | 0,001534417 | 0,019893578 |

|               |             |             |             |
|---------------|-------------|-------------|-------------|
| Adgrf5        | 5,086015211 | 1,50459E-06 | 8,06279E-05 |
| BC026585      | 5,085917809 | 0,001851522 | 0,022816948 |
| Klrb1         | 5,079684254 | 0,002036072 | 0,024246392 |
| Angptl1       | 5,07932459  | 0,000142047 | 0,003287905 |
| Il1r2         | 5,078473917 | 0,001660155 | 0,021030215 |
| Gm43045       | 5,076168558 | 0,002321089 | 0,02675759  |
| Gm26163       | 5,076168558 | 0,002321089 | 0,02675759  |
| Gm6905        | 5,075160468 | 0,001747507 | 0,021824094 |
| Rasgef1b      | 5,072914267 | 5,55168E-10 | 9,26187E-08 |
| Gm37897       | 5,071776835 | 0,00178656  | 0,022202057 |
| Htr6          | 5,071100824 | 0,002357519 | 0,027062736 |
| Gabra1        | 5,069666072 | 0,001830108 | 0,022600295 |
| Vsig4         | 5,067432193 | 0,001648488 | 0,020942429 |
| 1810059H22Rik | 5,067299492 | 0,002489939 | 0,027974639 |
| Epb41l3       | 5,06649086  | 0,001969095 | 0,023704241 |
| Gm16233       | 5,065705183 | 0,000102615 | 0,002527352 |
| St8sia2       | 5,062421181 | 0,002585628 | 0,028846712 |
| Sfta2         | 5,060458583 | 0,001846727 | 0,022773721 |
| Gm28344       | 5,058667334 | 0,002196392 | 0,025572406 |
| Dusp26        | 5,057582472 | 4,38526E-06 | 0,00019262  |
| Rgs18         | 5,056641188 | 0,001736385 | 0,021727091 |
| Prom2         | 5,048018214 | 0,001769069 | 0,022062207 |
| Fhl2          | 5,046918488 | 2,95497E-07 | 2,07364E-05 |
| Tnfsf10       | 5,046032159 | 0,001805431 | 0,022326738 |
| Fam92b        | 5,046032159 | 0,001805431 | 0,022326738 |
| Actn3         | 5,044541011 | 3,13055E-05 | 0,000974658 |
| RP23-442M18.5 | 5,041450947 | 0,002620973 | 0,029132169 |
| Gm43128       | 5,032617866 | 5,59899E-06 | 0,000236872 |
| Gm12216       | 5,032143725 | 0,00195003  | 0,023593009 |
| Gm12256       | 5,032143725 | 0,00195003  | 0,023593009 |
| Prkcz         | 5,029912588 | 6,67577E-10 | 1,08049E-07 |
| Gm44760       | 5,028449711 | 0,002041728 | 0,024297386 |
| Prex2         | 5,028125403 | 7,33788E-08 | 6,39227E-06 |
| Gm36266       | 5,026797429 | 0,001859185 | 0,022833821 |
| Tmem163       | 5,024460813 | 8,70332E-07 | 5,14747E-05 |
| Gm44438       | 5,023996741 | 0,001859348 | 0,022833821 |
| Mx1           | 5,023996741 | 0,001859348 | 0,022833821 |
| Gm43009       | 5,023651678 | 0,001972021 | 0,02372328  |
| Ndst3         | 5,018528361 | 5,45132E-05 | 0,001508625 |
| Csf1r         | 5,017488198 | 1,42981E-19 | 1,68565E-16 |
| Csrp3         | 5,017282107 | 0,001980594 | 0,023810211 |
| Cma1          | 5,016233936 | 0,002839189 | 0,030727185 |
| Gm37482       | 5,015630658 | 0,002693808 | 0,029736144 |
| Gm16287       | 5,01515592  | 0,002678269 | 0,029620082 |
| Tcap          | 5,012607334 | 1,92373E-07 | 1,47202E-05 |
| Gm43399       | 5,011514511 | 0,00277122  | 0,030250772 |
| Clec2g        | 5,011514511 | 0,00277122  | 0,030250772 |
| RP23-2F19.3   | 5,011514511 | 0,00277122  | 0,030250772 |
| Olftr733      | 5,011514511 | 0,00277122  | 0,030250772 |
| Gm37364       | 5,009026285 | 0,002806299 | 0,030483165 |
| Gm44810       | 5,004772941 | 0,002369518 | 0,027121394 |
| RP23-217J11.6 | 5,004562945 | 0,002776053 | 0,030266162 |
| Gm37020       | 5,003425885 | 0,002865816 | 0,030906338 |
| Tvp23bos      | 5,002242415 | 0,002336671 | 0,026884636 |
| Prelp         | 5,000693517 | 0,000104604 | 0,002558528 |
| Crygc         | 4,99873376  | 0,002804624 | 0,030483165 |
| Gm10605       | 4,998675314 | 0,002019945 | 0,024103731 |

|                      |             |             |             |
|----------------------|-------------|-------------|-------------|
| <b>Gm42993</b>       | 4,998465238 | 3,88659E-05 | 0,001151686 |
| <b>Fosl1</b>         | 4,997949617 | 0,0021394   | 0,0251383   |
| <b>Eya1</b>          | 4,995884691 | 2,50482E-10 | 4,42952E-08 |
| <b>4833421G17Rik</b> | 4,99543577  | 0,002359802 | 0,027062736 |
| <b>Tspan10</b>       | 4,995279437 | 0,003074112 | 0,03249408  |
| <b>Tbpl2</b>         | 4,994137568 | 0,002417136 | 0,027397017 |
| <b>Ms4a6b</b>        | 4,991756212 | 9,17012E-06 | 0,00035719  |
| <b>Snx22</b>         | 4,987695423 | 1,38671E-05 | 0,00049944  |
| <b>Myoz2</b>         | 4,986929967 | 0,002067144 | 0,024571881 |
| <b>Gm37702</b>       | 4,980830369 | 0,002095779 | 0,024802257 |
| <b>5330417C22Rik</b> | 4,977306341 | 0,002194238 | 0,025572406 |
| <b>Gm44068</b>       | 4,976431825 | 0,002213902 | 0,025756999 |
| <b>RP23-55A6.2</b>   | 4,976126133 | 0,00218742  | 0,025549759 |
| <b>Abcc3</b>         | 4,976126133 | 0,00218742  | 0,025549759 |
| <b>4732463B04Rik</b> | 4,975412103 | 0,002220909 | 0,025821529 |
| <b>Adam18</b>        | 4,975207171 | 0,002866229 | 0,030906338 |
| <b>Gm7932</b>        | 4,974925755 | 0,002465448 | 0,027803461 |
| <b>Ly6c1</b>         | 4,972433071 | 0,000351071 | 0,006576631 |
| <b>Gm18859</b>       | 4,972178355 | 0,002478519 | 0,027899514 |
| <b>Gm11884</b>       | 4,969654307 | 0,002286709 | 0,026430169 |
| <b>Gm29678</b>       | 4,969343593 | 0,003043075 | 0,032321418 |
| <b>Gm10863</b>       | 4,967178339 | 0,002401724 | 0,02734737  |
| <b>Gm15600</b>       | 4,966509183 | 0,002387777 | 0,027259812 |
| <b>Gm11587</b>       | 4,964847808 | 0,00225362  | 0,026133124 |
| <b>Gm37766</b>       | 4,964847808 | 0,00225362  | 0,026133124 |
| <b>Rep15</b>         | 4,962335549 | 1,33149E-06 | 7,24497E-05 |
| <b>Gm26520</b>       | 4,961463308 | 0,002252031 | 0,026133124 |
| <b>Gm38101</b>       | 4,961072916 | 0,003322948 | 0,034355069 |
| <b>Mgl2</b>          | 4,958667557 | 0,0025684   | 0,028710228 |
| <b>Gm43376</b>       | 4,955115501 | 0,003234708 | 0,03374783  |
| <b>Gm37460</b>       | 4,954795649 | 0,003313764 | 0,034289411 |
| <b>Bin2</b>          | 4,949600184 | 0,000123865 | 0,002944117 |
| <b>Dnah14</b>        | 4,947404879 | 0,002488207 | 0,027972949 |
| <b>Gm24505</b>       | 4,947216403 | 0,002425531 | 0,027442801 |
| <b>Gm15619</b>       | 4,947216403 | 0,002425531 | 0,027442801 |
| <b>Hoxd8</b>         | 4,946109585 | 0,000138704 | 0,003235943 |
| <b>Gngt2</b>         | 4,945192528 | 0,002317514 | 0,026751253 |
| <b>RP24-323H7.5</b>  | 4,940068962 | 0,002754565 | 0,0301434   |
| <b>Gm15823</b>       | 4,939992516 | 0,002587134 | 0,028846712 |
| <b>Eps8l2</b>        | 4,939831942 | 0,002367994 | 0,027121394 |
| <b>Gm26063</b>       | 4,939802789 | 0,002529    | 0,028359439 |
| <b>9530086O07Rik</b> | 4,936171206 | 0,000298014 | 0,005720873 |
| <b>Cryl1</b>         | 4,932727562 | 2,80048E-07 | 1,9889E-05  |
| <b>H2-DMb1</b>       | 4,932061878 | 8,84519E-07 | 5,21394E-05 |
| <b>Scn7a</b>         | 4,930094449 | 0,003286498 | 0,034087059 |
| <b>Gm23585</b>       | 4,927349542 | 0,003373122 | 0,034781508 |
| <b>Gm37781</b>       | 4,926569179 | 0,003399663 | 0,03499397  |
| <b>Gm28087</b>       | 4,925477035 | 0,003370484 | 0,034774582 |
| <b>5430402P08Rik</b> | 4,921595406 | 0,003385925 | 0,034872855 |
| <b>Gm44029</b>       | 4,916260337 | 0,003503996 | 0,0357351   |
| <b>Gm15531</b>       | 4,91277017  | 0,002722777 | 0,029854469 |
| <b>Gm5602</b>        | 4,902397086 | 0,002619803 | 0,029132169 |
| <b>Sox17</b>         | 4,901213429 | 0,002715044 | 0,029854469 |
| <b>Sftpd</b>         | 4,900227814 | 0,002816402 | 0,030548744 |
| <b>Hoxaas3</b>       | 4,899894516 | 0,002723098 | 0,029854469 |
| <b>Ern2</b>          | 4,899894516 | 0,002723098 | 0,029854469 |
| <b>Ccl5</b>          | 4,893769112 | 1,34289E-05 | 0,000485636 |



|                      |             |             |             |
|----------------------|-------------|-------------|-------------|
| <b>Olf716</b>        | 4,89366427  | 0,003098866 | 0,032677603 |
| <b>Irf6</b>          | 4,892772174 | 0,003593985 | 0,036380098 |
| <b>Bean1</b>         | 4,892423417 | 7,7734E-05  | 0,002024518 |
| <b>Fam178b</b>       | 4,889854929 | 0,003034888 | 0,032272377 |
| <b>Gm10735</b>       | 4,889854929 | 0,003034888 | 0,032272377 |
| <b>Lsr</b>           | 4,887817747 | 0,000103055 | 0,002531199 |
| <b>Tnfrsf8</b>       | 4,887284972 | 0,000205307 | 0,00430172  |
| <b>Pcp4</b>          | 4,884645293 | 0,002987217 | 0,031918997 |
| <b>Pla2g2d</b>       | 4,884020294 | 0,002910013 | 0,031283078 |
| <b>Olf718-ps1</b>    | 4,883367417 | 0,002874974 | 0,030981739 |
| <b>RP23-64B8.4</b>   | 4,882556289 | 0,003760132 | 0,037461512 |
| <b>Galr2</b>         | 4,882556289 | 0,003760132 | 0,037461512 |
| <b>Itga11</b>        | 4,882278484 | 0,003674975 | 0,036925146 |
| <b>Fxyd1</b>         | 4,880771915 | 2,34814E-05 | 0,000767552 |
| <b>Defb20</b>        | 4,879918516 | 0,003742866 | 0,03736219  |
| <b>Rhbf2</b>         | 4,879918516 | 0,003742866 | 0,03736219  |
| <b>Gm37248</b>       | 4,878189878 | 0,002738466 | 0,030004362 |
| <b>Gm37370</b>       | 4,877367407 | 0,002747292 | 0,030082423 |
| <b>Tnfrsf13b</b>     | 4,874286802 | 0,000231451 | 0,004683049 |
| <b>Gm43054</b>       | 4,873297421 | 0,002833549 | 0,03068492  |
| <b>Gm43931</b>       | 4,872464786 | 0,000105974 | 0,002588457 |
| <b>Gm38387</b>       | 4,870462653 | 3,26727E-06 | 0,00014815  |
| <b>Itgb2</b>         | 4,87003571  | 0,000298272 | 0,005720873 |
| <b>Dhx58</b>         | 4,869756392 | 0,003768211 | 0,037499747 |
| <b>Slc6a20b</b>      | 4,86563029  | 0,003841912 | 0,037927426 |
| <b>Cfh</b>           | 4,865501549 | 6,34681E-07 | 3,9107E-05  |
| <b>Gm19175</b>       | 4,861864302 | 0,002985873 | 0,031918997 |
| <b>Gpr17</b>         | 4,861176569 | 0,002545423 | 0,028489406 |
| <b>Gm26703</b>       | 4,86016962  | 0,004052841 | 0,039422685 |
| <b>Gm43684</b>       | 4,859193662 | 0,000108278 | 0,002633825 |
| <b>2810433D01Rik</b> | 4,85914354  | 0,000170942 | 0,003755202 |
| <b>Adap2</b>         | 4,858815492 | 0,00019677  | 0,004177291 |
| <b>Gm43219</b>       | 4,857590557 | 0,003238223 | 0,033764583 |
| <b>H2-T24</b>        | 4,85504145  | 0,003031552 | 0,032272377 |
| <b>Gm44962</b>       | 4,853887456 | 0,002974338 | 0,031839098 |
| <b>Gm25873</b>       | 4,853887456 | 0,002974338 | 0,031839098 |
| <b>RP23-387G19.1</b> | 4,853800451 | 0,002908605 | 0,031283078 |
| <b>Mfap4</b>         | 4,850724932 | 0,002940999 | 0,031539491 |
| <b>H2-M3</b>         | 4,850724932 | 0,002940999 | 0,031539491 |
| <b>Epsti1</b>        | 4,849650355 | 0,003070181 | 0,032471936 |
| <b>A630001G21Rik</b> | 4,848887271 | 0,0030129   | 0,032154572 |
| <b>Myom2</b>         | 4,847936449 | 0,00295923  | 0,031715777 |
| <b>Gm43075</b>       | 4,847135587 | 0,000361601 | 0,006752427 |
| <b>Iqch</b>          | 4,847036919 | 0,00399009  | 0,038962317 |
| <b>Cdkl1</b>         | 4,84701165  | 0,003304125 | 0,034209688 |
| <b>Irx6</b>          | 4,845781978 | 0,000663182 | 0,010848945 |
| <b>Gm26673</b>       | 4,845527878 | 0,003278187 | 0,034075081 |
| <b>Gm45324</b>       | 4,843791484 | 0,004022147 | 0,039210392 |
| <b>Gm42699</b>       | 4,841958979 | 0,003059463 | 0,032421512 |
| <b>Gm44812</b>       | 4,840793684 | 0,003206774 | 0,033540579 |
| <b>Gm42973</b>       | 4,840631313 | 0,003207256 | 0,033540579 |
| <b>Sept12</b>        | 4,836552592 | 0,004172687 | 0,040212419 |
| <b>Tpsb2</b>         | 4,836552592 | 0,004172687 | 0,040212419 |
| <b>C530050E15Rik</b> | 4,835758137 | 0,004157274 | 0,040138126 |
| <b>L1cam</b>         | 4,835075034 | 0,000236833 | 0,004768907 |
| <b>Gm19202</b>       | 4,832955406 | 0,003577424 | 0,036233196 |
| <b>B3gnt3</b>        | 4,828505286 | 0,003193626 | 0,03345739  |

|               |             |             |             |
|---------------|-------------|-------------|-------------|
| Gm9911        | 4,827269326 | 0,003258874 | 0,033919913 |
| Gm26798       | 4,823889266 | 0,004238148 | 0,040665988 |
| Fam167a       | 4,822969341 | 0,00335051  | 0,034605384 |
| Gm37826       | 4,822019094 | 0,003262478 | 0,033937449 |
| Cd86          | 4,82021142  | 0,003420762 | 0,035129356 |
| RP24-254O21.3 | 4,81701515  | 0,003213419 | 0,033582067 |
| Gm43970       | 4,813625285 | 0,004302115 | 0,041056988 |
| Nxn1          | 4,812948771 | 0,003457747 | 0,03542688  |
| Gm22424       | 4,811024733 | 0,003492057 | 0,035695691 |
| Btn1a1        | 4,810641346 | 0,003281864 | 0,034075081 |
| Gm45770       | 4,808249389 | 0,003352128 | 0,034605384 |
| Olfr890       | 4,806473891 | 0,003570276 | 0,036181521 |
| Fry           | 4,806166209 | 1,90094E-09 | 2,58586E-07 |
| Gm7990        | 4,80351009  | 0,004416385 | 0,041988902 |
| Slc15a3       | 4,802553286 | 0,000223931 | 0,004578022 |
| Gm44437       | 4,801712764 | 0,003495588 | 0,035705848 |
| Ablim3        | 4,795135464 | 0,003718996 | 0,03719837  |
| Gm42560       | 4,794910605 | 0,004490336 | 0,04246369  |
| Igsf6         | 4,794301295 | 0,003554152 | 0,036080149 |
| Erg           | 4,786429494 | 0,004076141 | 0,039614209 |
| Mecomos       | 4,785984335 | 0,004648748 | 0,043658236 |
| Acvr1         | 4,785217792 | 5,15226E-05 | 0,001443938 |
| 4930570D08Rik | 4,784410822 | 0,002137301 | 0,02513228  |
| Il17rb        | 4,783229562 | 0,003499716 | 0,035712049 |
| Gm15624       | 4,779822906 | 0,004695373 | 0,044002636 |
| Rpl7a-ps2     | 4,779199835 | 0,003679809 | 0,036931754 |
| 4930483J18Rik | 4,778460166 | 0,000616615 | 0,010231821 |
| Cyp2d11       | 4,775925612 | 0,003864723 | 0,038095746 |
| Gm43887       | 4,773303801 | 0,003994213 | 0,038981048 |
| Gm15268       | 4,772642759 | 0,000324767 | 0,006129333 |
| Sema7a        | 4,772247671 | 7,91252E-06 | 0,000316573 |
| Gm6162        | 4,771825028 | 0,004764509 | 0,044485519 |
| Epha10        | 4,768864794 | 0,004197321 | 0,040361842 |
| Ogn           | 4,767701826 | 0,000924015 | 0,013966052 |
| Scarf1        | 4,764472906 | 0,000289858 | 0,005589805 |
| Ccr5          | 4,763367366 | 7,38986E-06 | 0,000298913 |
| Ncf1          | 4,763060534 | 6,56527E-06 | 0,000272536 |
| RP24-286B23.2 | 4,761789669 | 0,004188959 | 0,040325285 |
| Gm5689        | 4,761270659 | 0,004163207 | 0,040164844 |
| Gm38036       | 4,76014933  | 0,003969658 | 0,038848611 |
| Gm43653       | 4,75907401  | 0,003985291 | 0,038936949 |
| Nmrk2         | 4,758702494 | 0,003969512 | 0,038848611 |
| Gm45179       | 4,754066148 | 0,005176599 | 0,047265584 |
| Syne3         | 4,753376603 | 3,71463E-06 | 0,000165883 |
| RP24-121J1.2  | 4,748754067 | 0,002019674 | 0,024103731 |
| Lrrc18        | 4,748405312 | 0,003825732 | 0,037837949 |
| Gm43654       | 4,747699704 | 0,003966381 | 0,038848611 |
| Gm14085       | 4,74676909  | 0,003894299 | 0,038323195 |
| A730015C16Rik | 4,74593851  | 0,004029876 | 0,039242475 |
| Crip1         | 4,743721769 | 2,28812E-07 | 1,70013E-05 |
| Gm44030       | 4,743571825 | 0,003934859 | 0,038614894 |
| Gm45662       | 4,743571825 | 0,003934859 | 0,038614894 |
| Olfr710       | 4,738137367 | 0,005220602 | 0,047576082 |
| RP23-142F22.1 | 4,738137367 | 0,005220602 | 0,047576082 |
| Olfr836       | 4,734399478 | 0,004423872 | 0,0420149   |
| Gm43963       | 4,733540792 | 0,005310281 | 0,0481081   |
| Sele          | 4,733090211 | 0,005227343 | 0,047576082 |

|                      |             |             |             |
|----------------------|-------------|-------------|-------------|
| <b>RP23-224F12.3</b> | 4,733090211 | 0,005227343 | 0,047576082 |
| <b>Gm25008</b>       | 4,733090211 | 0,005227343 | 0,047576082 |
| <b>Gm29438</b>       | 4,731185445 | 0,005260556 | 0,047833937 |
| <b>Clhc1</b>         | 4,730230467 | 0,004032467 | 0,03924609  |
| <b>Gm37978</b>       | 4,728346272 | 0,000432258 | 0,007800056 |
| <b>Gm12479</b>       | 4,726368676 | 0,00528566  | 0,04795124  |
| <b>Gm26700</b>       | 4,725462753 | 0,005580491 | 0,049967295 |
| <b>Gm44193</b>       | 4,724041539 | 0,004241621 | 0,040677241 |
| <b>Gm23735</b>       | 4,719294501 | 0,004477814 | 0,042390612 |
| <b>Ly9</b>           | 4,718341317 | 0,004357791 | 0,041521112 |
| <b>AF529169</b>      | 4,717121863 | 0,000777466 | 0,012319637 |
| <b>Ankrd1</b>        | 4,71625138  | 5,37384E-06 | 0,000231219 |
| <b>Mc1r</b>          | 4,715903181 | 0,000840404 | 0,01308249  |
| <b>Gm42494</b>       | 4,714540274 | 0,005382503 | 0,048563358 |
| <b>Snai2</b>         | 4,713329342 | 0,000219528 | 0,004508861 |
| <b>Arhgap30</b>      | 4,711604181 | 1,46961E-05 | 0,000524754 |
| <b>Gm6185</b>        | 4,710447365 | 0,005064966 | 0,046505123 |
| <b>Kndc1</b>         | 4,709221394 | 0,005319269 | 0,048140204 |
| <b>4930458D05Rik</b> | 4,708720323 | 0,001036162 | 0,015176522 |
| <b>Il18rap</b>       | 4,70765589  | 0,005720023 | 0,050779566 |
| <b>Gm26519</b>       | 4,707090688 | 0,005345531 | 0,048328414 |
| <b>Olf1588-ps1</b>   | 4,707024282 | 0,001243942 | 0,017183464 |
| <b>Gm37859</b>       | 4,704558147 | 0,005517936 | 0,049582916 |
| <b>Ifi203-ps</b>     | 4,701504377 | 0,004713887 | 0,044106021 |
| <b>Gm29605</b>       | 4,701504377 | 0,004713887 | 0,044106021 |
| <b>Gm16260</b>       | 4,700643469 | 0,000498049 | 0,008626347 |
| <b>Cd209d</b>        | 4,70004247  | 0,004660028 | 0,043740946 |
| <b>Gm43318</b>       | 4,697216201 | 0,005003499 | 0,046204632 |
| <b>Gm15766</b>       | 4,692688519 | 0,005690866 | 0,050707421 |
| <b>Obscn</b>         | 4,689562988 | 0,004946479 | 0,045725844 |
| <b>Olf1642</b>       | 4,688671457 | 0,000175575 | 0,003828454 |
| <b>Tlx3</b>          | 4,688101518 | 0,00458365  | 0,043161479 |
| <b>Mirt1</b>         | 4,683288452 | 0,005917473 | 0,052018251 |
| <b>E330017A01Rik</b> | 4,68229875  | 0,005261084 | 0,047833937 |
| <b>Naaa</b>          | 4,68170216  | 0,000682542 | 0,011073464 |
| <b>Slc6a20a</b>      | 4,678156566 | 0,005892507 | 0,05186814  |
| <b>Gm42479</b>       | 4,677353546 | 0,005029855 | 0,0463512   |
| <b>Tnf</b>           | 4,676899561 | 0,004666208 | 0,043775717 |
| <b>RP23-20I24.2</b>  | 4,676798563 | 0,00076959  | 0,012238923 |
| <b>Tes</b>           | 4,673676994 | 3,22062E-07 | 2,24226E-05 |
| <b>Ackr1</b>         | 4,671795269 | 0,005154456 | 0,047131025 |
| <b>Gm7290</b>        | 4,671714229 | 0,005918385 | 0,052018251 |
| <b>Gm37644</b>       | 4,670897073 | 0,00028951  | 0,005589805 |
| <b>Gm20945</b>       | 4,668731414 | 5,86836E-05 | 0,001606272 |
| <b>Col9a1</b>        | 4,667802287 | 1,71535E-05 | 0,000598308 |
| <b>Gm37735</b>       | 4,661330003 | 0,004772165 | 0,044533495 |
| <b>Crtam</b>         | 4,658428107 | 0,006114505 | 0,053265475 |
| <b>Gm44045</b>       | 4,656932965 | 0,004933858 | 0,045633028 |
| <b>Lmod3</b>         | 4,656833176 | 0,004904164 | 0,045474701 |
| <b>Ltb4r1</b>        | 4,653939072 | 0,000668379 | 0,010902568 |
| <b>A330023F24Rik</b> | 4,653658954 | 0,005102552 | 0,046777362 |
| <b>Mir142hg</b>      | 4,65215891  | 0,005054033 | 0,046471697 |
| <b>Gm37652</b>       | 4,652027081 | 0,005120371 | 0,046892096 |
| <b>Gm17509</b>       | 4,649671018 | 0,004931921 | 0,045633028 |
| <b>Cys1</b>          | 4,646969517 | 0,005459155 | 0,049182905 |
| <b>Padi2</b>         | 4,646846564 | 2,56239E-06 | 0,000122138 |
| <b>Pdgfra</b>        | 4,644264085 | 2,9435E-07  | 2,07364E-05 |

|               |             |             |             |
|---------------|-------------|-------------|-------------|
| Gm15535       | 4,644156352 | 0,006295539 | 0,05425454  |
| Adamts2       | 4,643848841 | 1,19776E-05 | 0,000440357 |
| Gm37120       | 4,643380333 | 0,000849812 | 0,013166852 |
| March1        | 4,639747492 | 0,000488359 | 0,008533732 |
| Gm11444       | 4,635507499 | 0,005205304 | 0,047497729 |
| Olfr1419      | 4,629691441 | 0,006596143 | 0,055811572 |
| Trim63        | 4,62704169  | 0,00517719  | 0,047265584 |
| Gm22338       | 4,626770089 | 0,006530371 | 0,055520709 |
| Gm43047       | 4,626770089 | 0,006530371 | 0,055520709 |
| Gm26015       | 4,626770089 | 0,006530371 | 0,055520709 |
| Plbd1         | 4,626167322 | 0,000833164 | 0,01300412  |
| Gsta3         | 4,624318165 | 0,0055428   | 0,049755773 |
| Gm8296        | 4,621185573 | 0,00564993  | 0,050435826 |
| Gm37792       | 4,620160469 | 0,006673639 | 0,056225168 |
| Stap1         | 4,620160469 | 0,006673639 | 0,056225168 |
| Cacna2d4      | 4,619343764 | 0,005601564 | 0,05007991  |
| Thbs4         | 4,617924857 | 0,005554751 | 0,049812485 |
| Abcg3         | 4,617632982 | 0,005767339 | 0,051045853 |
| Serpinf1      | 4,616858513 | 7,02796E-07 | 4,27087E-05 |
| Slc36a3os     | 4,616367323 | 0,006546226 | 0,055602044 |
| Gm42602       | 4,613183235 | 0,005854876 | 0,051639716 |
| Wbscr25       | 4,613183235 | 0,005854876 | 0,051639716 |
| 1700020D05Rik | 4,611694159 | 0,005528524 | 0,049652828 |
| Gm20681       | 4,611005445 | 0,005448131 | 0,049130419 |
| Cd209f        | 4,609465345 | 6,03248E-05 | 0,001633666 |
| Gm27248       | 4,608027194 | 0,005697836 | 0,050735412 |
| E230020D15Rik | 4,607774105 | 0,00706151  | 0,058217128 |
| Hist1h4h      | 4,607108377 | 0,000198369 | 0,004201148 |
| Fgd5          | 4,605550371 | 0,000616779 | 0,010231821 |
| Gbp11         | 4,605400977 | 0,00587335  | 0,051751035 |
| Slc1a1        | 4,602198502 | 0,000220601 | 0,004525655 |
| Gm2822        | 4,602093488 | 0,005715726 | 0,050766896 |
| Klhl6         | 4,601764192 | 0,000494899 | 0,008588602 |
| Gm26830       | 4,600132788 | 6,25318E-06 | 0,000261422 |
| Gm15394       | 4,596145771 | 0,006990174 | 0,057882169 |
| Gm45858       | 4,596145771 | 0,006990174 | 0,057882169 |
| Hal           | 4,592242456 | 1,46934E-06 | 7,8978E-05  |
| Gm26668       | 4,585972887 | 0,001511789 | 0,019730242 |
| Gm44680       | 4,58335723  | 0,00640778  | 0,054900764 |
| Gm13091       | 4,582355837 | 0,007530408 | 0,060724004 |
| Agbl1         | 4,579745035 | 0,007228457 | 0,059207052 |
| Gm45540       | 4,577650971 | 0,000848703 | 0,013166852 |
| Wisp1         | 4,575641502 | 1,43833E-06 | 7,7784E-05  |
| Gm36952       | 4,574961045 | 0,000703972 | 0,011358621 |
| H19           | 4,57385585  | 1,71263E-08 | 1,78673E-06 |
| Lmod2         | 4,571865128 | 0,006152559 | 0,053491571 |
| Gm17976       | 4,571573274 | 0,00749504  | 0,060511119 |
| Olfr784       | 4,571573274 | 0,00749504  | 0,060511119 |
| Gm37478       | 4,571502047 | 0,007455237 | 0,060420905 |
| 4932430I15Rik | 4,571502047 | 0,007455237 | 0,060420905 |
| Olfr117       | 4,571502047 | 0,007455237 | 0,060420905 |
| Gm37648       | 4,571462013 | 0,002932941 | 0,031491272 |
| Col20a1       | 4,568433589 | 0,000142734 | 0,003295176 |
| Lhx4          | 4,566978601 | 0,007493254 | 0,060511119 |
| Acvr1c        | 4,566978601 | 0,007493254 | 0,060511119 |
| Otx2os1       | 4,56597513  | 0,006224048 | 0,053901109 |
| Gm29803       | 4,560016927 | 0,006239704 | 0,05395742  |

|                      |             |             |             |
|----------------------|-------------|-------------|-------------|
| <b>Olfr1414</b>      | 4,558611222 | 0,006433161 | 0,054985024 |
| <b>Gm42909</b>       | 4,557017647 | 2,57971E-05 | 0,000825572 |
| <b>Arl11</b>         | 4,556446496 | 0,006286402 | 0,054202212 |
| <b>9330162012Rik</b> | 4,554498586 | 0,000298785 | 0,005722656 |
| <b>Sstr1</b>         | 4,554081613 | 2,75605E-05 | 0,000873442 |
| <b>Gm43398</b>       | 4,552706487 | 0,007553075 | 0,060879022 |
| <b>Nsa2-ps2</b>      | 4,551959992 | 0,006812445 | 0,056960813 |
| <b>Gm28523</b>       | 4,547643625 | 0,006278077 | 0,054183265 |
| <b>4933435G04Rik</b> | 4,545556014 | 0,007792749 | 0,062356095 |
| <b>Pebp4</b>         | 4,543129756 | 0,00689433  | 0,057292919 |
| <b>Themis2</b>       | 4,542674607 | 0,006450672 | 0,055081451 |
| <b>H2-Ob</b>         | 4,542607767 | 0,006614821 | 0,05594285  |
| <b>Gm5049</b>        | 4,542061614 | 0,007133772 | 0,058621572 |
| <b>Abra</b>          | 4,540820947 | 0,006752337 | 0,056672204 |
| <b>Acacb</b>         | 4,539574338 | 1,73928E-05 | 0,000603087 |
| <b>Prg4</b>          | 4,538806764 | 0,007181633 | 0,058960074 |
| <b>H2-M9</b>         | 4,538294776 | 0,006533768 | 0,055522897 |
| <b>Gm44607</b>       | 4,537867656 | 0,00665514  | 0,05614957  |
| <b>Gm45139</b>       | 4,536791866 | 0,007912417 | 0,063000082 |
| <b>Ugt8a</b>         | 4,536611491 | 0,000231965 | 0,004688086 |
| <b>Gm43878</b>       | 4,534863872 | 0,008425619 | 0,065551534 |
| <b>Sh2d1b1</b>       | 4,534043874 | 0,006500389 | 0,055372294 |
| <b>Entpd2</b>        | 4,532918659 | 0,00075285  | 0,012026552 |
| <b>Gm24030</b>       | 4,530506717 | 0,007014911 | 0,057973585 |
| <b>Gm42512</b>       | 4,529703072 | 0,008383832 | 0,065392578 |
| <b>Gm43879</b>       | 4,529703072 | 0,008383832 | 0,065392578 |
| <b>Olfr481</b>       | 4,529703072 | 0,008383832 | 0,065392578 |
| <b>Gm27249</b>       | 4,529639725 | 0,008043512 | 0,063689673 |
| <b>Gm11251</b>       | 4,521307309 | 0,0011284   | 0,016184821 |
| <b>Sfn</b>           | 4,519846025 | 0,000792302 | 0,012532257 |
| <b>Gm12992</b>       | 4,519806868 | 0,007032364 | 0,058058044 |
| <b>Rasal3</b>        | 4,51872287  | 0,007293438 | 0,059463884 |
| <b>Gm35048</b>       | 4,516210431 | 0,000708223 | 0,01141679  |
| <b>Gm38236</b>       | 4,515206184 | 0,007015578 | 0,057973585 |
| <b>Olfr1132</b>      | 4,512740473 | 0,006783271 | 0,056877837 |
| <b>Tmc3</b>          | 4,511595003 | 0,008481536 | 0,065705572 |
| <b>Gm44661</b>       | 4,511595003 | 0,008481536 | 0,065705572 |
| <b>Gm45116</b>       | 4,511595003 | 0,008481536 | 0,065705572 |
| <b>Olfr429</b>       | 4,507608461 | 0,00860514  | 0,066248713 |
| <b>Gm43522</b>       | 4,507608461 | 0,00860514  | 0,066248713 |
| <b>Gm42879</b>       | 4,507608461 | 0,00860514  | 0,066248713 |
| <b>Ccdc60</b>        | 4,506676289 | 0,001242866 | 0,017183464 |
| <b>Itgal</b>         | 4,506284791 | 3,97609E-05 | 0,001169937 |
| <b>Ffar2</b>         | 4,50587847  | 0,007422905 | 0,060269357 |
| <b>Olfr51</b>        | 4,505290047 | 0,007576421 | 0,060983808 |
| <b>Acod1</b>         | 4,502888663 | 0,008558938 | 0,066074768 |
| <b>Vmn1r67</b>       | 4,497569664 | 0,008849356 | 0,06694051  |
| <b>RP24-545O17.2</b> | 4,497569664 | 0,008849356 | 0,06694051  |
| <b>Olfr1231</b>      | 4,492043917 | 0,008726628 | 0,066489308 |
| <b>Ccdc158</b>       | 4,492043917 | 0,008726628 | 0,066489308 |
| <b>Gm42853</b>       | 4,492043917 | 0,008726628 | 0,066489308 |
| <b>RP24-361I17.1</b> | 4,490602917 | 0,008766918 | 0,066681367 |
| <b>Arhgap22</b>      | 4,490342368 | 3,87797E-05 | 0,001151686 |
| <b>Gm15670</b>       | 4,486287281 | 0,007603805 | 0,061101495 |
| <b>Sult6b2</b>       | 4,486287281 | 0,007603805 | 0,061101495 |
| <b>Gm31363</b>       | 4,485241344 | 0,001631789 | 0,02080501  |
| <b>Pth1r</b>         | 4,483706123 | 2,76952E-11 | 6,95782E-09 |

|               |             |             |             |
|---------------|-------------|-------------|-------------|
| Gm37226       | 4,482009123 | 0,007651813 | 0,061450798 |
| Esm1          | 4,480897017 | 5,94697E-07 | 3,70304E-05 |
| Gm13899       | 4,479551758 | 0,008938386 | 0,067376993 |
| Gm45187       | 4,478652295 | 0,001179263 | 0,016656615 |
| Gm5362        | 4,477043137 | 0,008982144 | 0,06759159  |
| Pax9          | 4,477043137 | 0,008982144 | 0,06759159  |
| Rlbp1         | 4,47478038  | 3,18786E-05 | 0,000986451 |
| H60b          | 4,474144391 | 0,009373578 | 0,069648046 |
| Gm37731       | 4,472349723 | 0,000447201 | 0,00800435  |
| 1110046J04Rik | 4,470366589 | 0,000179535 | 0,003881289 |
| Tek           | 4,468576924 | 0,001314502 | 0,017748029 |
| Gm16552       | 4,467676414 | 0,007732304 | 0,062012725 |
| Grap          | 4,46741242  | 0,008167265 | 0,06430539  |
| Cd80          | 4,46741242  | 0,008167265 | 0,06430539  |
| Gm23481       | 4,466018809 | 0,008262139 | 0,064821504 |
| Gm44286       | 4,465471701 | 0,009030007 | 0,06780253  |
| Rab9b         | 4,465471701 | 0,009030007 | 0,06780253  |
| Slit3         | 4,463817537 | 0,008412997 | 0,065533837 |
| RP23-291O3.1  | 4,461965712 | 0,009108411 | 0,068165439 |
| 1700063D05Rik | 4,461147807 | 0,009300687 | 0,069222788 |
| Nt5e          | 4,460782918 | 8,01178E-07 | 4,7865E-05  |
| Mlph          | 4,458971489 | 3,63553E-06 | 0,000162761 |
| Fndc7         | 4,457710979 | 0,0078383   | 0,062663881 |
| Gm38192       | 4,456794088 | 0,000271966 | 0,005341501 |
| Ltf           | 4,455257507 | 0,008214356 | 0,064561186 |
| Jaml          | 4,455178236 | 0,000258145 | 0,005116065 |
| Coq8a         | 4,454674461 | 6,85031E-05 | 0,001820752 |
| Gm26831       | 4,450782963 | 0,007862558 | 0,062716043 |
| Gm45833       | 4,450782963 | 0,007862558 | 0,062716043 |
| Gm17322       | 4,448790882 | 0,007894575 | 0,062886335 |
| Gm11636       | 4,448790882 | 0,007894575 | 0,062886335 |
| BC002189      | 4,448022182 | 0,009646907 | 0,070916252 |
| Etos1         | 4,448022182 | 0,009646907 | 0,070916252 |
| Gm20561       | 4,448022182 | 0,009646907 | 0,070916252 |
| Gm15228       | 4,448022182 | 0,009646907 | 0,070916252 |
| Etnk2         | 4,446162728 | 0,008482573 | 0,065705572 |
| Gm26808       | 4,445730023 | 0,00974799  | 0,071323688 |
| Milr1         | 4,445729378 | 0,000855619 | 0,013237773 |
| Gm4778        | 4,44366985  | 0,00968937  | 0,071049195 |
| Cd70          | 4,44366985  | 0,00968937  | 0,071049195 |
| Vmn1r72       | 4,440842545 | 0,008560127 | 0,066074768 |
| Myh11         | 4,439597408 | 0,001311326 | 0,017728969 |
| Cxcl15        | 4,438800014 | 0,009880407 | 0,071873762 |
| 2810032G03Rik | 4,438439882 | 0,008117935 | 0,064088194 |
| Gm15631       | 4,438069895 | 0,001267717 | 0,017365074 |
| C130073E24Rik | 4,437159065 | 0,002817519 | 0,030548744 |
| Fgf18         | 4,436845201 | 0,009993597 | 0,07230116  |
| Gm38170       | 4,436845201 | 0,009993597 | 0,07230116  |
| Gm42876       | 4,436572085 | 0,009739876 | 0,071320896 |
| Prkcd         | 4,436213731 | 5,40141E-07 | 3,46082E-05 |
| Gm36988       | 4,435479198 | 0,008472268 | 0,065705572 |
| Gm12503       | 4,435301259 | 0,008658703 | 0,066367116 |
| Gm42685       | 4,435301259 | 0,008658703 | 0,066367116 |
| Gm45878       | 4,435301259 | 0,008658703 | 0,066367116 |
| Mobp          | 4,435301259 | 0,008658703 | 0,066367116 |
| Gm14033       | 4,434718004 | 0,009832532 | 0,071643385 |
| Cnga1         | 4,434718004 | 0,009832532 | 0,071643385 |

|               |             |             |             |
|---------------|-------------|-------------|-------------|
| Gm38095       | 4,434718004 | 0,009832532 | 0,071643385 |
| Gm15638       | 4,434718004 | 0,009832532 | 0,071643385 |
| Fmpd2         | 4,434190633 | 0,008421804 | 0,065550693 |
| Sash3         | 4,433615519 | 0,000913428 | 0,013853396 |
| Rbm46os       | 4,431001736 | 0,00986838  | 0,071845382 |
| Olfr432       | 4,426677947 | 0,004475587 | 0,042390612 |
| Sorcs3        | 4,424261716 | 1,52893E-07 | 1,22342E-05 |
| Cdhr4         | 4,423988842 | 0,008857769 | 0,06694051  |
| Gm37067       | 4,423449689 | 0,008316616 | 0,065046895 |
| Gm37720       | 4,423412339 | 0,008602842 | 0,066248713 |
| Gm37321       | 4,423240019 | 0,008712675 | 0,066472899 |
| Gabrp         | 4,418432612 | 0,008809949 | 0,066836179 |
| Krt19         | 4,417641758 | 0,008784864 | 0,066703104 |
| Gfap          | 4,417608648 | 0,003843358 | 0,037927426 |
| Gm43330       | 4,415982721 | 0,008888868 | 0,067089521 |
| Vipr2         | 4,414124205 | 0,000194747 | 0,004144285 |
| Grhl2         | 4,413456382 | 0,008524998 | 0,065989004 |
| Gm14443       | 4,409241127 | 0,008853523 | 0,06694051  |
| 3425401B19Rik | 4,409241127 | 0,008853523 | 0,06694051  |
| Gm18529       | 4,407855297 | 0,009037014 | 0,06780253  |
| AI427809      | 4,407545541 | 0,001243233 | 0,017183464 |
| C1qtnf1       | 4,403095237 | 4,63324E-08 | 4,28975E-06 |
| Chst1         | 4,396602911 | 4,16458E-06 | 0,000184578 |
| Gm10244       | 4,392239998 | 0,009773478 | 0,071478159 |
| Gm36888       | 4,392233525 | 0,009250853 | 0,068997084 |
| Gm12530       | 4,390624464 | 0,009421707 | 0,069917524 |
| Gm45447       | 4,389499261 | 0,009091491 | 0,068095692 |
| Gm26721       | 4,38931124  | 0,000226779 | 0,004614921 |
| Wnk4          | 4,387983583 | 1,18533E-07 | 9,65959E-06 |
| Serping1      | 4,387395739 | 8,58687E-05 | 0,00219536  |
| Olfr741       | 4,38284112  | 0,009827371 | 0,071643385 |
| Kcnj8         | 4,382435029 | 1,60466E-05 | 0,00056415  |
| Kcnip4        | 4,382006295 | 0,00557862  | 0,049967295 |
| Moxd1         | 4,379306627 | 1,88666E-06 | 9,58726E-05 |
| Kdr           | 4,376668836 | 1,82413E-09 | 2,52014E-07 |
| Gm10401       | 4,375768038 | 0,009891684 | 0,071911826 |
| Olfr95        | 4,374468961 | 0,009290723 | 0,069177743 |
| Gm38318       | 4,365578654 | 0,009522873 | 0,070520304 |
| Meg3          | 4,358606721 | 8,08068E-09 | 9,65532E-07 |
| Gm13666       | 4,357999755 | 0,002028646 | 0,024176766 |
| Klk7          | 4,357514544 | 0,003056658 | 0,032421512 |
| Bfsp2         | 4,357309067 | 0,000488084 | 0,008533732 |
| Slamf8        | 4,355960798 | 8,10792E-05 | 0,002098733 |
| Ccm2l         | 4,355590196 | 0,002788934 | 0,030369161 |
| Ifi44l        | 4,352430738 | 0,00980053  | 0,071587183 |
| Rhoh          | 4,352430738 | 0,00980053  | 0,071587183 |
| Gm37941       | 4,35048631  | 0,00018543  | 0,003989232 |
| Gm23604       | 4,349619219 | 0,001058592 | 0,015407517 |
| RP23-416K18.1 | 4,333976052 | 0,002691631 | 0,029730672 |
| Gm3836        | 4,332274142 | 0,00590466  | 0,051949259 |
| D030055H07Rik | 4,330754553 | 0,003085957 | 0,032580339 |
| Gm16587       | 4,330417604 | 0,00507719  | 0,046593161 |
| A130048G24Rik | 4,328517245 | 7,45013E-05 | 0,00195472  |
| Lingo2        | 4,318750495 | 0,001964451 | 0,023696696 |
| RP23-403D16.3 | 4,314830231 | 0,001984654 | 0,023819518 |
| Slco2b1       | 4,311707538 | 0,000291909 | 0,005618099 |
| Pianp         | 4,31099777  | 3,32375E-06 | 0,000150303 |



|               |             |             |             |
|---------------|-------------|-------------|-------------|
| Asb2          | 4,30994176  | 0,002020003 | 0,024103731 |
| Fbln5         | 4,304635215 | 0,000229409 | 0,004663072 |
| Thsd1         | 4,301376116 | 6,06378E-05 | 0,001639631 |
| Ifi44         | 4,299297469 | 5,29317E-06 | 0,000228862 |
| Col19a1       | 4,298620603 | 0,000158078 | 0,00354753  |
| Tspan2        | 4,297684695 | 0,000158284 | 0,003547655 |
| Hoxa7         | 4,291271039 | 2,30407E-05 | 0,000755941 |
| Ptpn6         | 4,288287748 | 1,9415E-06  | 9,80957E-05 |
| Gm28693       | 4,278795758 | 0,000937279 | 0,014106248 |
| 1810041L15Rik | 4,277208808 | 2,48589E-07 | 1,80907E-05 |
| Tubb3         | 4,271744997 | 2,90983E-14 | 1,39074E-11 |
| Gm37668       | 4,26957995  | 0,005670056 | 0,050564434 |
| Myocd         | 4,268221651 | 0,00689229  | 0,057292919 |
| Stmn4         | 4,261419403 | 0,000489927 | 0,008552684 |
| Ksr2          | 4,260146404 | 0,001874524 | 0,022988266 |
| Il2rg         | 4,26008809  | 0,002895974 | 0,031189043 |
| Fam46c        | 4,258998839 | 3,25192E-06 | 0,000147833 |
| Abcg1         | 4,232496574 | 0,000109174 | 0,002648329 |
| Gm17651       | 4,226978746 | 0,005050497 | 0,046468775 |
| Igsf21        | 4,217104627 | 2,45765E-05 | 0,000796701 |
| Matn3         | 4,213255869 | 0,003137485 | 0,032966895 |
| Gm43167       | 4,206970007 | 0,000134415 | 0,003140026 |
| RP24-401F19.2 | 4,205158668 | 0,003810822 | 0,037732687 |
| Gm43321       | 4,200879145 | 0,003130211 | 0,032910017 |
| S100a3        | 4,200596151 | 0,000211288 | 0,004385456 |
| Cd34          | 4,200042544 | 1,22462E-05 | 0,000446519 |
| 1700120G07Rik | 4,196481552 | 0,003063796 | 0,032443219 |
| RP24-502M22.1 | 4,196385925 | 0,003113568 | 0,032778756 |
| Stat6         | 4,190044886 | 0,000280891 | 0,005453066 |
| 9330175M20Rik | 4,186849527 | 0,002435173 | 0,027516671 |
| Baiap211      | 4,181291633 | 0,002611867 | 0,029085798 |
| Bcl3          | 4,175921391 | 0,000123267 | 0,002937816 |
| Gm44567       | 4,175793817 | 0,001960125 | 0,023665958 |
| Prkag3        | 4,173713261 | 0,001628107 | 0,020803064 |
| Lrrc15        | 4,167110455 | 8,628E-05   | 0,00219536  |
| Tmem196       | 4,16504869  | 0,004130497 | 0,039980136 |
| Gm28875       | 4,164642788 | 1,26379E-05 | 0,00045891  |
| Ly6k          | 4,155687822 | 0,003050837 | 0,03238355  |
| Luzp2         | 4,152319801 | 0,009157495 | 0,068387307 |
| Grid2         | 4,14944454  | 0,003516097 | 0,035796578 |
| A330040F15Rik | 4,142460646 | 0,009108512 | 0,068165439 |
| Clgn          | 4,142207961 | 4,55818E-05 | 0,001302211 |
| 2900052N01Rik | 4,141822606 | 0,000961055 | 0,014378427 |
| Dcx           | 4,141431149 | 0,000230402 | 0,004672514 |
| Cdkn1c        | 4,137687779 | 4,58609E-07 | 3,00757E-05 |
| Ptprb         | 4,133690989 | 6,1673E-05  | 0,001662538 |
| Sptb          | 4,12777662  | 2,13695E-05 | 0,000715716 |
| Il13ra1       | 4,117587735 | 0,000547895 | 0,009316328 |
| Pstpip1       | 4,115836349 | 1,96963E-10 | 3,67442E-08 |
| Grik3         | 4,101906064 | 0,00101772  | 0,014985307 |
| RP24-447J10.1 | 4,095741599 | 0,008273807 | 0,064826761 |
| Klk1b7-ps     | 4,09260759  | 0,004951765 | 0,045750795 |
| Gm26699       | 4,083438986 | 0,007240807 | 0,059225917 |
| Gm45407       | 4,077277999 | 0,001187091 | 0,01672274  |
| Gm5660        | 4,070093905 | 0,006796695 | 0,056932121 |
| Rgs14         | 4,053359244 | 0,000648021 | 0,01066009  |
| Gm5347        | 4,050059776 | 0,000652779 | 0,010728381 |

|               |             |             |             |
|---------------|-------------|-------------|-------------|
| Stab2         | 4,046051714 | 0,006568086 | 0,055692554 |
| Gm37899       | 4,041355972 | 0,005824327 | 0,051447254 |
| Col1a1        | 4,041090892 | 2,46819E-10 | 4,40884E-08 |
| Gm16005       | 4,036544221 | 0,006411898 | 0,054909442 |
| Isg15         | 4,035943646 | 8,24914E-08 | 7,08145E-06 |
| Il1r12        | 4,035467085 | 0,004832325 | 0,044928933 |
| RP24-93F20.12 | 4,033208574 | 0,000578676 | 0,009743192 |
| Gm15283       | 4,032561624 | 4,43432E-05 | 0,001277142 |
| Ccl12         | 4,032439129 | 0,001076675 | 0,015619295 |
| Plin3         | 4,030026495 | 6,11277E-06 | 0,000256157 |
| Mypn          | 4,029110845 | 0,006321897 | 0,054375694 |
| Gm45049       | 4,027094352 | 0,001348818 | 0,018083773 |
| Pcdh8         | 4,025250094 | 0,000141293 | 0,003283737 |
| Gm36388       | 4,020905808 | 0,000229675 | 0,004663123 |
| Dcdc2a        | 4,013706758 | 0,005860351 | 0,051662235 |
| 2310002F09Rik | 4,005646735 | 0,000445559 | 0,007999246 |
| Gm22339       | 4,004326947 | 0,004816832 | 0,044879272 |
| Igfbp7        | 4,003137691 | 4,3801E-08  | 4,07672E-06 |
| Rps19-ps8     | 3,995341536 | 0,006904659 | 0,057351807 |
| Gm44234       | 3,991954371 | 0,005691825 | 0,050707421 |
| C430014B12Rik | 3,991113684 | 0,006525    | 0,055520709 |
| Bricd5        | 3,989776882 | 0,006820003 | 0,05696974  |
| Foxs1         | 3,989471857 | 0,000346353 | 0,00650203  |
| Apold1        | 3,98895559  | 1,04093E-05 | 0,000395051 |
| Nxf3          | 3,983498511 | 0,004289964 | 0,040970398 |
| Il21r         | 3,981817934 | 0,000858598 | 0,013271418 |
| RP24-232D3.1  | 3,980715325 | 0,009690718 | 0,071049195 |
| Col13a1       | 3,980486282 | 1,42678E-06 | 7,73961E-05 |
| Cadm3         | 3,980287082 | 0,005714844 | 0,050766896 |
| Gm44028       | 3,980125249 | 0,001095974 | 0,015873216 |
| Gjc1          | 3,978389534 | 0,000411409 | 0,007461901 |
| Chrm2         | 3,962718868 | 0,004266186 | 0,040868487 |
| Pycard        | 3,961231245 | 0,000471107 | 0,008281361 |
| 5730507A11Rik | 3,961075938 | 0,004113915 | 0,039870739 |
| Mylpf         | 3,959067455 | 9,07392E-05 | 0,002276073 |
| Itih3         | 3,952875618 | 0,006861882 | 0,05723845  |
| Myrf          | 3,941175804 | 0,00384248  | 0,037927426 |
| Sfn5          | 3,938271075 | 9,20141E-07 | 5,37022E-05 |
| Aoc3          | 3,938204989 | 0,00067037  | 0,010905995 |
| Gpat3         | 3,938149663 | 0,00626947  | 0,054135404 |
| Lnx1          | 3,934431601 | 0,001985409 | 0,023819518 |
| Lypd6b        | 3,932731432 | 0,001663397 | 0,021056205 |
| Gliplr1       | 3,932355474 | 5,42461E-05 | 0,001503587 |
| RP23-288I20.5 | 3,929132232 | 0,008481859 | 0,065705572 |
| Chst8         | 3,923510459 | 0,003645008 | 0,036704228 |
| Arhgef3       | 3,914769557 | 1,15906E-05 | 0,000428805 |
| Garnl3        | 3,912651493 | 0,000477211 | 0,008372023 |
| Klhl29        | 3,909540521 | 0,007219674 | 0,059189949 |
| Baiap2l2      | 3,90642782  | 0,006265213 | 0,054125077 |
| Gm9946        | 3,897317821 | 0,007754752 | 0,062164568 |
| Gm37143       | 3,892436766 | 0,002014875 | 0,02409131  |
| A530083M17Rik | 3,887094513 | 0,008378891 | 0,065392578 |
| Ahnak         | 3,88536029  | 8,00692E-07 | 4,7865E-05  |
| Fbp1          | 3,883423499 | 0,008549819 | 0,066052864 |
| Amz1          | 3,879469496 | 3,33175E-06 | 0,000150303 |
| Gm43859       | 3,873510646 | 0,006779571 | 0,056873781 |
| Gm7589        | 3,872629961 | 0,00127491  | 0,017423119 |

|               |             |             |             |
|---------------|-------------|-------------|-------------|
| Ssh3          | 3,872475857 | 5,12571E-05 | 0,001440218 |
| Gm5745        | 3,866835534 | 0,003431801 | 0,035181429 |
| Gm12057       | 3,865792406 | 0,006710465 | 0,056427895 |
| Gm42442       | 3,863948683 | 0,006122919 | 0,053312509 |
| RP23-136K21.4 | 3,856622374 | 0,001064976 | 0,015474971 |
| Gm10032       | 3,856619948 | 0,008088098 | 0,06393828  |
| Fam160a1      | 3,850417585 | 0,004107142 | 0,039841305 |
| Klhl41        | 3,848113111 | 0,0002312   | 0,004683049 |
| Gm43023       | 3,847006119 | 0,002114421 | 0,024946634 |
| Thbs1         | 3,846820321 | 3,99582E-05 | 0,001173789 |
| 5730559C18Rik | 3,832965038 | 5,76744E-06 | 0,000242837 |
| Nlrc3         | 3,830445034 | 0,009607153 | 0,070916221 |
| Irf8          | 3,829622998 | 3,76291E-05 | 0,001125945 |
| Tgfb1         | 3,827861375 | 1,98502E-05 | 0,000677667 |
| Stk32a        | 3,82379284  | 8,55065E-05 | 0,002191446 |
| Cmklr1        | 3,821255811 | 8,38947E-06 | 0,000328956 |
| Myo1d         | 3,81404188  | 0,001803441 | 0,022326738 |
| Gm44708       | 3,813889447 | 0,008754906 | 0,066676039 |
| Ablim2        | 3,813481888 | 0,001050813 | 0,015344821 |
| Gm23534       | 3,809648765 | 0,00397875  | 0,038894531 |
| Serpinc1      | 3,808862455 | 0,004694512 | 0,044002636 |
| AA474408      | 3,801645584 | 0,008176063 | 0,064346015 |
| Pgm5          | 3,800909783 | 8,1465E-06  | 0,000323737 |
| Gm19938       | 3,800444575 | 0,000449751 | 0,008025626 |
| Runx3         | 3,799348835 | 0,002487929 | 0,027972949 |
| Emp3          | 3,791420831 | 2,59289E-05 | 0,000827665 |
| 1700027J19Rik | 3,786486809 | 0,001641216 | 0,020892638 |
| RP24-370M23.1 | 3,781448113 | 0,006010338 | 0,0526955   |
| Cd300a        | 3,777763856 | 0,007041957 | 0,058093901 |
| Col6a3        | 3,775779748 | 1,58736E-06 | 8,40444E-05 |
| Dock9         | 3,772939112 | 1,78135E-06 | 9,21092E-05 |
| Fmn1          | 3,771109189 | 7,46184E-06 | 0,000299659 |
| Sfrp1         | 3,767284648 | 0,001282331 | 0,017476592 |
| Apba1         | 3,763361338 | 4,13319E-13 | 1,62425E-10 |
| Csn3          | 3,76293564  | 0,001676913 | 0,021181812 |
| Gm42670       | 3,76099347  | 0,008429914 | 0,065556113 |
| Dbpht2        | 3,754065543 | 0,000216463 | 0,00447189  |
| Tspan18       | 3,750629934 | 0,001187727 | 0,01672274  |
| Plek          | 3,743411952 | 2,9244E-08  | 2,92176E-06 |
| Fstl3         | 3,737450635 | 0,003043155 | 0,032321418 |
| Rasgrp3       | 3,733702015 | 0,001237686 | 0,017183464 |
| Gm12882       | 3,72827236  | 0,007428156 | 0,060284312 |
| Elf4          | 3,728026998 | 0,004578124 | 0,043132412 |
| Fgl2          | 3,725550033 | 0,001265192 | 0,017343913 |
| Gm38375       | 3,716909067 | 0,000576319 | 0,009724837 |
| Pou2f2        | 3,715836614 | 1,73608E-07 | 1,35844E-05 |
| S1pr3         | 3,711350759 | 9,42363E-05 | 0,002350458 |
| RP24-347C6.6  | 3,706999373 | 0,006103555 | 0,0532485   |
| Gm45599       | 3,692890604 | 0,004508273 | 0,042596524 |
| Fstl4         | 3,692217587 | 0,003617804 | 0,036558427 |
| Tph2          | 3,684450922 | 0,009982578 | 0,072289893 |
| Stac2         | 3,680715501 | 0,000805717 | 0,012665154 |
| Gm45130       | 3,67680479  | 0,003514079 | 0,035796578 |
| Nacad         | 3,669812656 | 0,002181184 | 0,025527503 |
| Gm43076       | 3,669797065 | 0,006020866 | 0,052761638 |
| Phactr1       | 3,668280884 | 0,000459291 | 0,0081414   |
| 4930519E07Rik | 3,667299799 | 0,001447476 | 0,019045504 |

|               |             |             |             |
|---------------|-------------|-------------|-------------|
| Nynrin        | 3,664363423 | 1,15777E-05 | 0,000428805 |
| Gm15839       | 3,663147    | 0,004244137 | 0,040679304 |
| Cmb1          | 3,658941183 | 1,02633E-06 | 5,91191E-05 |
| Abi3          | 3,658265232 | 0,001148316 | 0,016389709 |
| Apod          | 3,657309848 | 0,000883527 | 0,01351583  |
| Afap111       | 3,656227273 | 0,00014529  | 0,003332427 |
| Shisa7        | 3,649248159 | 0,00583433  | 0,051509885 |
| Ankrd44       | 3,646880131 | 4,43011E-09 | 5,51704E-07 |
| Gm42443       | 3,644587168 | 0,007349569 | 0,05978371  |
| Adap2os       | 3,644076552 | 0,003696293 | 0,037034134 |
| Cxcl12        | 3,642854769 | 0,001735066 | 0,021727091 |
| Arhgap24      | 3,641472652 | 0,000697283 | 0,011271257 |
| Gm38190       | 3,637376451 | 0,003147594 | 0,033053473 |
| Gnao1         | 3,63538964  | 0,000272252 | 0,005341501 |
| Ppfibp1       | 3,633629491 | 1,74092E-16 | 1,18409E-13 |
| Gm42819       | 3,633444786 | 0,006639613 | 0,05607207  |
| Gm26588       | 3,631276809 | 0,00015277  | 0,003468023 |
| Zfp352        | 3,6311951   | 0,004892649 | 0,045394332 |
| Gda           | 3,625081847 | 0,000501796 | 0,00865732  |
| Tmem86a       | 3,624320055 | 4,46759E-05 | 0,001284632 |
| Mybpc2        | 3,624022584 | 0,004206204 | 0,040381381 |
| Lypd6         | 3,622573194 | 3,44245E-11 | 8,11685E-09 |
| Ncmap         | 3,619561376 | 0,001853549 | 0,022826021 |
| Rbfox1        | 3,615921208 | 0,000573432 | 0,009694612 |
| Cpm           | 3,615251206 | 3,87766E-09 | 4,89803E-07 |
| Dock5         | 3,610710566 | 0,005763671 | 0,051045853 |
| She           | 3,603741015 | 0,006633444 | 0,05607207  |
| Gjb6          | 3,599408428 | 0,008045845 | 0,063689673 |
| Gm12463       | 3,598675158 | 0,00795267  | 0,063235166 |
| Cacna1g       | 3,589661869 | 0,001319636 | 0,017786314 |
| RP23-58D1.2   | 3,578358949 | 0,00146056  | 0,019189116 |
| Olfcr355      | 3,57552257  | 0,00321692  | 0,033582067 |
| Tmem88b       | 3,575099082 | 0,000892981 | 0,01362508  |
| Tinagl1       | 3,561804677 | 8,61155E-05 | 0,00219536  |
| D430040D24Rik | 3,558521614 | 0,007477425 | 0,060511119 |
| Tagln         | 3,557082947 | 0,000116656 | 0,002818241 |
| Gm16540       | 3,552785971 | 0,001384686 | 0,018369689 |
| Gm37760       | 3,551841433 | 0,000166721 | 0,003689969 |
| Jph1          | 3,551123005 | 0,000873895 | 0,013414899 |
| Hrasls        | 3,549640301 | 0,001307077 | 0,017698587 |
| Arg1          | 3,549008606 | 0,006053403 | 0,052941827 |
| Gm29135       | 3,546987769 | 0,005750722 | 0,050995385 |
| RP23-443L2.4  | 3,54047111  | 0,001365244 | 0,018205785 |
| Arfgef3       | 3,537996342 | 0,001343144 | 0,018048751 |
| Opcml         | 3,532862274 | 0,000369299 | 0,006872339 |
| Cpeb1         | 3,529962811 | 0,002666338 | 0,029525059 |
| Mettl21b      | 3,527759106 | 0,001365713 | 0,018205785 |
| Mall          | 3,526711125 | 0,007856052 | 0,062716043 |
| Sh3rf2        | 3,519957078 | 0,008008311 | 0,063530015 |
| Ass1          | 3,51681186  | 0,006802622 | 0,056932121 |
| Arhgef5       | 3,509456674 | 0,002408041 | 0,027367477 |
| Crtac1        | 3,50842017  | 0,001966302 | 0,023702855 |
| Olfcr777      | 3,500343925 | 0,003748143 | 0,037384186 |
| 2900079G21Rik | 3,49956535  | 0,006591733 | 0,05580096  |
| Lair1         | 3,491121805 | 2,3443E-05  | 0,000767552 |
| RP23-443L2.1  | 3,489982926 | 0,000492079 | 0,008564003 |
| Smad6         | 3,482126669 | 0,002492178 | 0,027982011 |

|               |             |             |             |
|---------------|-------------|-------------|-------------|
| Gm8566        | 3,48090729  | 0,006482057 | 0,055264359 |
| Gm45620       | 3,480294815 | 0,008596438 | 0,066248713 |
| Serpinb9      | 3,474753878 | 0,007021002 | 0,057991316 |
| Gucy1a3       | 3,469970052 | 1,56809E-05 | 0,000554603 |
| Gm15327       | 3,466238573 | 0,009032779 | 0,06780253  |
| RP23-72A20.11 | 3,460304959 | 6,54233E-05 | 0,001750297 |
| Gm44228       | 3,4583547   | 0,008691606 | 0,066422801 |
| Arhgap15      | 3,457454263 | 0,004826515 | 0,044898526 |
| Gm16300       | 3,452074595 | 0,00031335  | 0,005939216 |
| Fam131b       | 3,451351717 | 0,004703292 | 0,044053508 |
| Loxl1         | 3,447839583 | 0,000159752 | 0,003551386 |
| Gm17103       | 3,447417613 | 0,009340978 | 0,069464191 |
| RP24-435P22.2 | 3,446087675 | 0,00897097  | 0,067565009 |
| Gm11826       | 3,445301964 | 0,009620093 | 0,070916252 |
| Gm11225       | 3,443935156 | 0,002632248 | 0,02920243  |
| Pcolce2       | 3,44271997  | 5,82027E-05 | 0,001600711 |
| Gm15856       | 3,439885082 | 0,004462734 | 0,042293138 |
| Gm38380       | 3,438387497 | 1,11115E-05 | 0,000414643 |
| Gm37645       | 3,428595752 | 0,000262314 | 0,005182982 |
| Gm2238        | 3,426028413 | 0,005948247 | 0,052254746 |
| Frzb          | 3,421685001 | 4,42435E-07 | 2,91941E-05 |
| Nostrin       | 3,421058115 | 0,006589922 | 0,05580096  |
| C1ql1         | 3,412721125 | 0,000407133 | 0,007399527 |
| Spem1         | 3,410752569 | 0,000669515 | 0,010902568 |
| Ddx60         | 3,409622447 | 0,00389169  | 0,038318844 |
| Gm29019       | 3,409467461 | 0,006800454 | 0,056932121 |
| Cdo1          | 3,406837297 | 1,07352E-05 | 0,000403059 |
| Gm43961       | 3,397742993 | 0,004482725 | 0,042414401 |
| Palm2         | 3,39717405  | 0,004430787 | 0,042057993 |
| Gm37906       | 3,393847275 | 0,001857656 | 0,022833821 |
| Gm37052       | 3,390665886 | 0,000591415 | 0,009932173 |
| Vcan          | 3,387331469 | 1,08782E-11 | 3,00579E-09 |
| Gm43323       | 3,382582126 | 0,000543213 | 0,009246437 |
| Vsir          | 3,381845151 | 0,001245211 | 0,017183464 |
| S100a4        | 3,377888576 | 2,61944E-06 | 0,000123856 |
| Il1rap1       | 3,375176989 | 0,004151026 | 0,040112976 |
| Cyth4         | 3,371653623 | 0,006104226 | 0,0532485   |
| Cd300ld       | 3,368002099 | 0,002468204 | 0,027803461 |
| Ccrl2         | 3,358884813 | 0,006359555 | 0,054646441 |
| Gfra1         | 3,354720088 | 0,000448148 | 0,008005103 |
| 0610040J01Rik | 3,349192843 | 0,000796689 | 0,012579157 |
| Smagp         | 3,343342425 | 0,002328679 | 0,026810132 |
| P2ry6         | 3,341855889 | 0,000372694 | 0,006915765 |
| Cdh15         | 3,338957881 | 0,000392406 | 0,007189868 |
| Ppp4r1l-ps    | 3,337944839 | 3,45856E-05 | 0,001054502 |
| Gm44005       | 3,336847579 | 0,006989746 | 0,057882169 |
| Glis1         | 3,336075017 | 0,002358683 | 0,027062736 |
| Mcmdc2        | 3,33407575  | 0,009533711 | 0,07057101  |
| Pxylp1        | 3,33097285  | 1,12648E-05 | 0,000419382 |
| RP23-350F7.3  | 3,330853034 | 0,006164452 | 0,053525465 |
| Gm37608       | 3,317905905 | 0,004144659 | 0,040073346 |
| Gm42788       | 3,315653509 | 0,009968565 | 0,072240214 |
| 2700029L08Rik | 3,311862538 | 0,005583977 | 0,049973204 |
| Olfr77        | 3,303429218 | 0,008576905 | 0,066175388 |
| Frrs1         | 3,297395633 | 1,31731E-10 | 2,58838E-08 |
| Pcsk5         | 3,291428346 | 0,006165538 | 0,053525465 |
| Gm42991       | 3,281390765 | 3,62951E-05 | 0,001097167 |

|               |             |             |             |
|---------------|-------------|-------------|-------------|
| Ghr           | 3,272187956 | 0,0096588   | 0,070932813 |
| Tox           | 3,271636347 | 2,20893E-06 | 0,00010881  |
| Npffr1        | 3,270578748 | 0,003295082 | 0,034156052 |
| Cdk5r2        | 3,269266073 | 0,000257728 | 0,005116043 |
| Atp8b1        | 3,268905615 | 0,001141953 | 0,016325224 |
| Myrip         | 3,25687735  | 0,001198132 | 0,016815694 |
| Cxcl16        | 3,256425813 | 0,0045092   | 0,042596524 |
| Pcgf2         | 3,255075536 | 1,05726E-05 | 0,000398648 |
| 9530013L04Rik | 3,251443742 | 0,004114686 | 0,039870739 |
| Gm43527       | 3,251326494 | 0,003215225 | 0,033582067 |
| C530043K16Rik | 3,248430683 | 0,001725609 | 0,021673222 |
| Adamts5       | 3,244342611 | 2,83826E-06 | 0,000131737 |
| 2510017J16Rik | 3,242852043 | 0,008777985 | 0,066693917 |
| Irgm2         | 3,242582697 | 0,004788225 | 0,044636248 |
| Gm38120       | 3,239867155 | 0,000604036 | 0,01007715  |
| Steap3        | 3,225016334 | 0,000252336 | 0,005036462 |
| Megf11        | 3,224878701 | 4,57592E-05 | 0,001305172 |
| Fam105a       | 3,224046074 | 0,00282141  | 0,030572195 |
| Tuft1         | 3,219666373 | 0,002563173 | 0,028669921 |
| Gm38399       | 3,215571273 | 0,000177195 | 0,003854262 |
| Aqp4          | 3,213800103 | 0,009281144 | 0,069135528 |
| Tll3          | 3,213066992 | 8,77444E-05 | 0,002226216 |
| Fah           | 3,202592161 | 0,002123098 | 0,025029907 |
| Sfmbt2        | 3,202001158 | 1,65907E-05 | 0,00058155  |
| Rtp4          | 3,201519648 | 4,16245E-07 | 2,76725E-05 |
| Sh3pxd2a      | 3,192860794 | 1,20206E-18 | 1,18095E-15 |
| Hist4h4       | 3,192680798 | 0,006994695 | 0,057882169 |
| Cd200r3       | 3,189459054 | 0,006126788 | 0,053319943 |
| Itga9         | 3,187570984 | 3,63581E-05 | 0,001097196 |
| Plppr4        | 3,187210078 | 0,002096775 | 0,024802257 |
| Gm43378       | 3,184502061 | 3,14885E-05 | 0,000978313 |
| Gm37010       | 3,17847954  | 0,008283675 | 0,06484662  |
| Sh3bgrl2      | 3,159811889 | 0,001885523 | 0,023091123 |
| Col9a2        | 3,156255339 | 0,007330301 | 0,059681882 |
| Lhfpl2        | 3,155391967 | 1,80518E-06 | 9,24748E-05 |
| Ctgf          | 3,139245957 | 8,9446E-05  | 0,002253224 |
| H2-D1         | 3,138231546 | 1,48698E-09 | 2,13787E-07 |
| D630003M21Rik | 3,132166003 | 0,006087456 | 0,053160777 |
| Emb           | 3,129802951 | 2,18128E-06 | 0,00010805  |
| 9530059O14Rik | 3,127030639 | 0,008657867 | 0,066367116 |
| Tlr1          | 3,125113814 | 0,004448349 | 0,042179408 |
| Igsf9b        | 3,121215691 | 0,002995906 | 0,031992511 |
| Shroom1       | 3,119473531 | 0,001565144 | 0,020202926 |
| Dnm3          | 3,11775465  | 0,000225454 | 0,004598541 |
| Plppr5        | 3,117711553 | 0,000872143 | 0,013399636 |
| Cnn2          | 3,115763645 | 1,12464E-06 | 6,39488E-05 |
| Lrmp          | 3,114560312 | 0,000775082 | 0,01231496  |
| Gm19552       | 3,104038704 | 0,002846188 | 0,030765277 |
| Nrbf2         | 3,102167005 | 0,000905942 | 0,013786043 |
| Rnf128        | 3,097925673 | 0,000143371 | 0,003305571 |
| Rpgrip1       | 3,09720611  | 0,003928503 | 0,038595357 |
| Gm42727       | 3,096503694 | 0,002377028 | 0,027172181 |
| Hip1r         | 3,095335876 | 0,000393594 | 0,007197842 |
| Vstm2b        | 3,093833387 | 0,002380993 | 0,027199925 |
| Cr2           | 3,092557905 | 0,005752985 | 0,050995385 |
| Tgfa          | 3,089926575 | 0,000373338 | 0,006920447 |
| A130071D04Rik | 3,089373349 | 0,006228767 | 0,053915571 |

|                      |             |             |             |
|----------------------|-------------|-------------|-------------|
| <b>Tpd521l</b>       | 3,087705509 | 0,000728288 | 0,011676374 |
| <b>Slc16a7</b>       | 3,084380372 | 0,008779882 | 0,066693917 |
| <b>Camk2n1</b>       | 3,083583838 | 0,0002495   | 0,004998121 |
| <b>Dact2</b>         | 3,08156711  | 0,008156301 | 0,06429576  |
| <b>Nipal2</b>        | 3,073478484 | 0,005042907 | 0,046447277 |
| <b>Cd40</b>          | 3,069375275 | 0,003113215 | 0,032778756 |
| <b>Ifi2712a</b>      | 3,069021111 | 0,001969098 | 0,023704241 |
| <b>Nalcn</b>         | 3,068448367 | 0,0001594   | 0,003551386 |
| <b>Tm6sf1</b>        | 3,066246834 | 0,002719225 | 0,029854469 |
| <b>Pik3cd</b>        | 3,057826457 | 0,001209895 | 0,01694044  |
| <b>Fam129b</b>       | 3,055946659 | 0,000237043 | 0,004768907 |
| <b>Slco2a1</b>       | 3,050015002 | 0,002412208 | 0,02737965  |
| <b>Zfp536</b>        | 3,03752617  | 0,000978901 | 0,014534754 |
| <b>Edil3</b>         | 3,037079395 | 0,001186566 | 0,01672274  |
| <b>Gabrg2</b>        | 3,036568408 | 0,009186521 | 0,068575108 |
| <b>Fam65b</b>        | 3,034931132 | 0,001651467 | 0,020965216 |
| <b>Smad7</b>         | 3,030894664 | 0,001737283 | 0,021727091 |
| <b>Itrp3</b>         | 3,03002529  | 0,00642513  | 0,054942936 |
| <b>Gm44439</b>       | 3,02739345  | 0,009646252 | 0,070916252 |
| <b>Sapcd1</b>        | 3,025845581 | 0,001205697 | 0,016895042 |
| <b>Erc2</b>          | 3,021599635 | 1,23633E-10 | 2,52683E-08 |
| <b>Cd68</b>          | 3,020135011 | 2,29965E-05 | 0,000755891 |
| <b>Skor1</b>         | 3,007656287 | 0,005022464 | 0,046307226 |
| <b>Cd200</b>         | 3,006657657 | 0,001038778 | 0,015194171 |
| <b>Cobl</b>          | 3,006216684 | 0,003714045 | 0,037169873 |
| <b>Gm37447</b>       | 3,003178878 | 0,006733458 | 0,056567444 |
| <b>Ctcflos</b>       | 3,001923033 | 0,004774861 | 0,044535146 |
| <b>Cyp39a1</b>       | 2,997501665 | 4,51511E-05 | 0,001291995 |
| <b>Scube3</b>        | 2,991675057 | 0,008000589 | 0,063501978 |
| <b>Samd5</b>         | 2,989877935 | 0,00351957  | 0,035811325 |
| <b>A730062M13Rik</b> | 2,98959266  | 0,004006571 | 0,039080092 |
| <b>Cbr2</b>          | 2,989333378 | 0,001216205 | 0,017001878 |
| <b>RP23-444K20.4</b> | 2,988370906 | 0,003965533 | 0,038848611 |
| <b>Erbp4</b>         | 2,986815056 | 0,000978576 | 0,014534754 |
| <b>Eva1b</b>         | 2,98589066  | 0,009971633 | 0,072240214 |
| <b>Cdh6</b>          | 2,982715557 | 0,000207675 | 0,004335918 |
| <b>Gm15859</b>       | 2,967892032 | 0,008677869 | 0,06637519  |
| <b>Apbb1ip</b>       | 2,963932825 | 0,002143645 | 0,025171458 |
| <b>Meox1</b>         | 2,958999555 | 0,000864488 | 0,013316732 |
| <b>RP23-469K15.2</b> | 2,957751784 | 0,005287543 | 0,04795124  |
| <b>Irx1</b>          | 2,957660395 | 0,00505607  | 0,046471697 |
| <b>Cyfp2</b>         | 2,952491763 | 0,000117385 | 0,002820439 |
| <b>Gm43481</b>       | 2,947163214 | 0,007498405 | 0,060511119 |
| <b>RP23-363J15.4</b> | 2,938495384 | 0,009147928 | 0,068344726 |
| <b>Aldh1a3</b>       | 2,93054772  | 0,004642915 | 0,043626621 |
| <b>5830444F18Rik</b> | 2,92585445  | 0,003867842 | 0,038105248 |
| <b>Cntfr</b>         | 2,915294144 | 0,005484958 | 0,049336725 |
| <b>Ehbp1l1</b>       | 2,908110376 | 1,2805E-07  | 1,03873E-05 |
| <b>Col18a1</b>       | 2,89513385  | 1,69007E-07 | 1,32832E-05 |
| <b>Ptprd</b>         | 2,894105205 | 0,002187166 | 0,025549759 |
| <b>Lgals9</b>        | 2,892903342 | 0,000942829 | 0,014150124 |
| <b>Tceal1</b>        | 2,891106259 | 0,002710841 | 0,029831063 |
| <b>Fbn1</b>          | 2,891076831 | 4,16483E-08 | 3,9176E-06  |
| <b>Nrip3</b>         | 2,88934843  | 0,004349405 | 0,041463543 |
| <b>Plekhd1</b>       | 2,888133945 | 0,004029748 | 0,039242475 |
| <b>Serpine1</b>      | 2,88794103  | 0,004439956 | 0,04212242  |
| <b>Tmem204</b>       | 2,877859462 | 0,000875465 | 0,01342734  |



|               |             |             |             |
|---------------|-------------|-------------|-------------|
| Scara3        | 2,873055828 | 8,61665E-05 | 0,00219536  |
| Plppr3        | 2,869983515 | 0,001240978 | 0,017183464 |
| Rmdn2         | 2,869884504 | 0,006816998 | 0,05696974  |
| Pmp22         | 2,868554116 | 3,82567E-17 | 2,81888E-14 |
| Astn2         | 2,865570784 | 0,001308417 | 0,017703177 |
| Rhob          | 2,85738662  | 0,00020508  | 0,00430172  |
| Robo2         | 2,856457251 | 0,002468414 | 0,027803461 |
| Trim30a       | 2,854517823 | 0,001939853 | 0,023544516 |
| Tubb4a        | 2,850066385 | 1,01185E-06 | 5,84756E-05 |
| Gm26606       | 2,847406369 | 0,009436688 | 0,069999324 |
| Ephb2         | 2,842995203 | 7,19509E-05 | 0,001896244 |
| Rell1         | 2,841286833 | 0,000117316 | 0,002820439 |
| Gm42515       | 2,840540618 | 0,005974219 | 0,052430813 |
| Dnah10        | 2,838878564 | 0,005747623 | 0,050995385 |
| Gpx3          | 2,836854836 | 2,3637E-05  | 0,000771211 |
| Itih5         | 2,835561494 | 0,002405695 | 0,027358399 |
| Slc43a3       | 2,833142824 | 0,004325764 | 0,041260413 |
| Pgbd5         | 2,829552607 | 0,001158447 | 0,016494344 |
| Akr1b8        | 2,829247108 | 0,005318076 | 0,048140204 |
| Gm44168       | 2,829180804 | 0,00369883  | 0,037038567 |
| Eln           | 2,823590919 | 0,002657133 | 0,029460027 |
| Gm44557       | 2,822121994 | 2,30644E-06 | 0,000112671 |
| Gm19967       | 2,820498412 | 0,008195739 | 0,06445111  |
| Jsrp1         | 2,820395604 | 0,004204969 | 0,040381381 |
| Tagln3        | 2,807296613 | 0,000603722 | 0,01007715  |
| Gm37452       | 2,80558128  | 0,000174732 | 0,003819483 |
| Tceal3        | 2,802094225 | 0,00225603  | 0,026143927 |
| Dscaml1       | 2,800648888 | 0,003781731 | 0,037528688 |
| Gp1bb         | 2,798752021 | 0,002125817 | 0,025045269 |
| Gm37699       | 2,792067487 | 0,00114999  | 0,016390548 |
| Lmcd1         | 2,790556413 | 0,001126762 | 0,016184821 |
| Gm44639       | 2,790307754 | 6,76268E-06 | 0,000279419 |
| Rassf4        | 2,788959273 | 1,70555E-06 | 8,89705E-05 |
| Rpl23a-ps2    | 2,787830328 | 0,007993191 | 0,063471747 |
| Zdhhc2        | 2,780653193 | 1,47183E-05 | 0,000524754 |
| Htatip2       | 2,77933734  | 0,007681575 | 0,061633835 |
| Gm42447       | 2,769776233 | 0,000292153 | 0,005618099 |
| Tmem100       | 2,769662027 | 1,61601E-06 | 8,47997E-05 |
| Serpnb6a      | 2,762432103 | 2,584E-06   | 0,000122837 |
| Ifit3b        | 2,757829539 | 0,008662895 | 0,066367116 |
| Adamts17      | 2,756715741 | 0,002317217 | 0,026751253 |
| Grrp1         | 2,755403802 | 0,002587101 | 0,028846712 |
| Lypd1         | 2,755245936 | 6,46337E-05 | 0,001731791 |
| Gm43289       | 2,752458035 | 0,009612428 | 0,070916221 |
| Cacnb4        | 2,746573787 | 0,000760724 | 0,012119502 |
| Gpr155        | 2,745714088 | 0,000441639 | 0,007945012 |
| Tspan11       | 2,744216504 | 0,000814655 | 0,012782934 |
| Gm37303       | 2,741517838 | 0,001104299 | 0,015954596 |
| Ccdc177       | 2,740927983 | 0,000147963 | 0,00337622  |
| Clstn3        | 2,740822928 | 0,007043278 | 0,058093901 |
| Thbs2         | 2,7383791   | 0,009033632 | 0,06780253  |
| Mmp16         | 2,731084645 | 0,005129307 | 0,04692533  |
| Tpm2          | 2,725107652 | 0,000174283 | 0,003817613 |
| Hunk          | 2,724173922 | 0,000106431 | 0,002596045 |
| 3110080O07Rik | 2,717430599 | 0,006025827 | 0,052777196 |
| Fam114a1      | 2,717010229 | 7,74061E-05 | 0,002021933 |
| S100b         | 2,714443539 | 0,004397441 | 0,04183128  |

|                      |             |             |             |
|----------------------|-------------|-------------|-------------|
| <b>Dbn2</b>          | 2,710812385 | 0,000986429 | 0,014621974 |
| <b>Col16a1</b>       | 2,709488854 | 0,00038656  | 0,007128189 |
| <b>Snai1</b>         | 2,701621447 | 0,008549143 | 0,066052864 |
| <b>Itga1</b>         | 2,700945292 | 0,000601933 | 0,010061042 |
| <b>Slc16a6</b>       | 2,69160096  | 2,77342E-06 | 0,000129749 |
| <b>Adgra2</b>        | 2,687020108 | 0,000732823 | 0,011738449 |
| <b>Ifih1</b>         | 2,684535524 | 0,008393489 | 0,065416686 |
| <b>Cgnl1</b>         | 2,682317393 | 0,001949834 | 0,023593009 |
| <b>Prkg2</b>         | 2,678080032 | 7,40352E-06 | 0,000298913 |
| <b>Uap1l1</b>        | 2,675450916 | 6,81235E-10 | 1,08049E-07 |
| <b>Optn</b>          | 2,671072145 | 0,000558946 | 0,009476896 |
| <b>Itgb3</b>         | 2,671024625 | 0,005277733 | 0,04795124  |
| <b>Nabp1</b>         | 2,664732304 | 0,002078883 | 0,024640063 |
| <b>Ampd3</b>         | 2,657763481 | 0,002816129 | 0,030548744 |
| <b>Plekhh1</b>       | 2,648138873 | 0,000553283 | 0,009389887 |
| <b>Gpc3</b>          | 2,639304689 | 0,000131815 | 0,003099765 |
| <b>Atxn1</b>         | 2,62599542  | 6,76326E-07 | 4,12419E-05 |
| <b>At1</b>           | 2,624543705 | 0,007270237 | 0,059356816 |
| <b>Gm44770</b>       | 2,624148437 | 0,00427503  | 0,040931044 |
| <b>Etl4</b>          | 2,622220526 | 4,59197E-07 | 3,00757E-05 |
| <b>Arhgef6</b>       | 2,610667716 | 0,000311166 | 0,005910475 |
| <b>Nmnat2</b>        | 2,605321393 | 0,0001549   | 0,003511853 |
| <b>Ptpn18</b>        | 2,601025743 | 0,00074197  | 0,011874214 |
| <b>Arvcf</b>         | 2,597025216 | 2,43182E-07 | 1,77931E-05 |
| <b>Cacnb3</b>        | 2,593199865 | 0,002801261 | 0,030465862 |
| <b>Tmem8</b>         | 2,590698043 | 0,000827489 | 0,012938385 |
| <b>Coro1a</b>        | 2,583640418 | 0,006990997 | 0,057882169 |
| <b>Ptprk</b>         | 2,582249363 | 0,001100668 | 0,015928155 |
| <b>Gm15902</b>       | 2,581851568 | 0,00895931  | 0,067505942 |
| <b>Dlc1</b>          | 2,565635006 | 0,000141538 | 0,003284722 |
| <b>Enpp1</b>         | 2,564515585 | 0,000423496 | 0,007657577 |
| <b>Il17d</b>         | 2,56093923  | 0,006197511 | 0,053719999 |
| <b>Myo1c</b>         | 2,560370205 | 1,00336E-09 | 1,5296E-07  |
| <b>Gm14049</b>       | 2,557895467 | 0,009636251 | 0,070916252 |
| <b>Arrb1</b>         | 2,557623078 | 2,37859E-06 | 0,000114926 |
| <b>Rgs9</b>          | 2,555176351 | 0,008304892 | 0,064983946 |
| <b>Sh3bp4</b>        | 2,551878272 | 0,000791233 | 0,012526554 |
| <b>Slc7a2</b>        | 2,54734432  | 0,000213082 | 0,004412343 |
| <b>Arsb</b>          | 2,546093525 | 0,000114824 | 0,002777758 |
| <b>Prickle1</b>      | 2,543813611 | 1,60732E-09 | 2,25586E-07 |
| <b>6330562C20Rik</b> | 2,538745104 | 0,009561681 | 0,070689286 |
| <b>Gm37258</b>       | 2,536495452 | 0,003301711 | 0,03420472  |
| <b>Plpp2</b>         | 2,529055149 | 0,00419562  | 0,040361842 |
| <b>Lrp4</b>          | 2,528477977 | 2,12191E-05 | 0,000712028 |
| <b>Tmem144</b>       | 2,52354842  | 0,006857147 | 0,05723845  |
| <b>Rin2</b>          | 2,517011947 | 0,00026751  | 0,005267984 |
| <b>Gm38021</b>       | 2,516299332 | 0,005574882 | 0,049967295 |
| <b>Eogt</b>          | 2,505713903 | 1,02983E-06 | 5,91285E-05 |
| <b>Kcnk13</b>        | 2,494579887 | 0,007574744 | 0,060983808 |
| <b>Esyt1</b>         | 2,494225904 | 0,000156616 | 0,003529285 |
| <b>Cela1</b>         | 2,488029528 | 0,001928474 | 0,023438583 |
| <b>Birc3</b>         | 2,486852822 | 0,005106274 | 0,046787229 |
| <b>Ugdh</b>          | 2,484737724 | 0,002373417 | 0,02714845  |
| <b>Irf9</b>          | 2,483876415 | 1,31089E-05 | 0,000475036 |
| <b>Pde4d</b>         | 2,478536921 | 0,000210407 | 0,004372312 |
| <b>Gm20045</b>       | 2,477304152 | 0,006891157 | 0,057292919 |
| <b>Ddc</b>           | 2,457213098 | 0,002844557 | 0,030765277 |

|               |             |             |             |
|---------------|-------------|-------------|-------------|
| Raph1         | 2,450803512 | 1,40404E-05 | 0,000503632 |
| Arid3a        | 2,449830783 | 0,002098999 | 0,024811964 |
| Abca7         | 2,434975217 | 0,000131516 | 0,003096842 |
| Kcna6         | 2,425536079 | 0,000661079 | 0,010834588 |
| Fam102a       | 2,418710088 | 2,17672E-07 | 1,63801E-05 |
| Lmo7          | 2,406174533 | 0,000575917 | 0,009724837 |
| Dleu7         | 2,39075823  | 0,000117168 | 0,002820439 |
| B4galt1       | 2,387653917 | 0,000610516 | 0,01016607  |
| Fbxo7         | 2,38424075  | 0,001345581 | 0,018067771 |
| Gm43343       | 2,375125748 | 0,00083224  | 0,013001185 |
| C1ql3         | 2,367360474 | 5,06314E-05 | 0,001428016 |
| Ptpre         | 2,364381368 | 0,00263138  | 0,02920243  |
| Socs1         | 2,356870829 | 0,001022976 | 0,01503883  |
| Gm42992       | 2,351984162 | 0,003655396 | 0,036770207 |
| Card6         | 2,350987256 | 0,001537434 | 0,019917942 |
| Gm19353       | 2,350938492 | 0,000908365 | 0,013788438 |
| Synpo         | 2,344257859 | 0,003692151 | 0,037013608 |
| Parm1         | 2,326705187 | 0,005764999 | 0,051045853 |
| Psmb8         | 2,325987169 | 0,000376283 | 0,006953177 |
| Ngef          | 2,324089701 | 0,008881988 | 0,067089521 |
| Ehd3          | 2,323962912 | 0,002903849 | 0,031254821 |
| Dleu2         | 2,323663172 | 0,000451334 | 0,008045751 |
| Clu           | 2,314710904 | 0,009194825 | 0,06860814  |
| Gm44190       | 2,314639945 | 0,000150663 | 0,003433402 |
| 5930430L01Rik | 2,310121832 | 0,001672101 | 0,021151237 |
| Ulbp1         | 2,307059684 | 0,007245445 | 0,059236452 |
| Wwp2          | 2,30049852  | 5,53986E-06 | 0,000235687 |
| Cep170b       | 2,300029329 | 5,52722E-07 | 3,51595E-05 |
| Tmeff2        | 2,297826353 | 0,001781255 | 0,022167283 |
| Stat1         | 2,282113643 | 6,51822E-06 | 0,000271219 |
| Lpgat1        | 2,277144459 | 8,97793E-05 | 0,002258402 |
| A930004J17Rik | 2,266875421 | 0,000157482 | 0,003538696 |
| Lat2          | 2,266359035 | 2,07977E-06 | 0,000103602 |
| Tmem117       | 2,262996575 | 0,009906926 | 0,071977847 |
| Epha4         | 2,251196877 | 0,000890053 | 0,013592143 |
| Trim25        | 2,249419314 | 0,001271024 | 0,017383445 |
| Kit           | 2,248948555 | 0,004850718 | 0,045052572 |
| Lzts1         | 2,241036626 | 0,006812493 | 0,056960813 |
| Dixdc1        | 2,24037327  | 0,00866814  | 0,066367116 |
| Arhgap23      | 2,237333683 | 5,89499E-05 | 0,001606272 |
| Tiam1         | 2,236993601 | 0,006750312 | 0,056672204 |
| Amotl2        | 2,236805883 | 9,6522E-08  | 8,16696E-06 |
| Sparc         | 2,231435638 | 4,40899E-06 | 0,000192992 |
| Abhd12        | 2,222176419 | 5,60072E-09 | 6,87799E-07 |
| Khdrbs2       | 2,221664476 | 0,001917084 | 0,023348291 |
| RP24-511J14.2 | 2,219711824 | 0,005381601 | 0,048563358 |
| Smarca1       | 2,216107031 | 0,000985608 | 0,014621974 |
| Grik4         | 2,214328532 | 0,001069052 | 0,015521447 |
| Sh3d19        | 2,213670885 | 0,000100135 | 0,002483583 |
| Prkcq         | 2,21092284  | 0,002150543 | 0,025218965 |
| Sym           | 2,207780273 | 0,001901081 | 0,02320132  |
| D630045J12Rik | 2,206885783 | 3,97151E-05 | 0,001169937 |
| Dync1i1       | 2,199819889 | 0,000709542 | 0,011427626 |
| Sh3kbp1       | 2,195404276 | 5,20361E-05 | 0,001454656 |
| Elfn2         | 2,191342731 | 0,007306067 | 0,059511967 |
| Pnck          | 2,188370344 | 0,00648429  | 0,055264359 |
| Crebrf        | 2,188263907 | 0,001118311 | 0,016091303 |

|            |             |             |             |
|------------|-------------|-------------|-------------|
| Sh3rf1     | 2,187509008 | 1,1878E-06  | 6,6262E-05  |
| Ifi35      | 2,179577444 | 0,001119776 | 0,016099279 |
| Ctsl       | 2,178092657 | 0,000593156 | 0,00994253  |
| Map1b      | 2,16928432  | 0,003646761 | 0,036704228 |
| St6gal1    | 2,161494693 | 0,005367582 | 0,048478202 |
| Map6       | 2,153582181 | 0,000363026 | 0,006771898 |
| Zbtb20     | 2,149434694 | 0,000369577 | 0,006872339 |
| Gm42467    | 2,149382166 | 0,001878768 | 0,023024341 |
| Tram2      | 2,143967066 | 2,51075E-06 | 0,00012     |
| Rny1       | 2,14382654  | 0,003025252 | 0,032247468 |
| Timp2      | 2,138839087 | 9,02474E-08 | 7,70984E-06 |
| Rgs4       | 2,134901456 | 0,00093165  | 0,01404417  |
| Rac3       | 2,134504254 | 0,009653295 | 0,070921843 |
| Arrdc1     | 2,133606588 | 0,001960431 | 0,023665958 |
| Aebp1      | 2,12426957  | 3,65615E-09 | 4,65147E-07 |
| Scyl3      | 2,122397459 | 0,000541906 | 0,009241138 |
| Hoga1      | 2,11975593  | 0,006637387 | 0,05607207  |
| Cux2       | 2,111551511 | 0,007124794 | 0,058575013 |
| Snx7       | 2,10177655  | 0,000278651 | 0,005432929 |
| Grb14      | 2,096434622 | 0,006484593 | 0,055264359 |
| Mtmt10     | 2,095981855 | 0,001193609 | 0,016765509 |
| Irgm1      | 2,088657871 | 0,004419294 | 0,041993979 |
| Selenom    | 2,086477361 | 0,000209805 | 0,004372295 |
| Setdb2     | 2,081968611 | 0,005615532 | 0,050179414 |
| Slc26a2    | 2,079077979 | 0,001193217 | 0,016765509 |
| Cast       | 2,078520207 | 0,008700075 | 0,0664588   |
| P2rx4      | 2,075271581 | 2,21221E-05 | 0,000735353 |
| Aim1       | 2,063335506 | 0,009544883 | 0,070597832 |
| Maml3      | 2,058125372 | 0,003780163 | 0,037528688 |
| Actn1      | 2,053206493 | 0,003829683 | 0,037855849 |
| Hexb       | 2,046166022 | 0,00026808  | 0,005273338 |
| Scfd2      | 2,044216933 | 0,002517262 | 0,028245723 |
| S100a16    | 2,03748901  | 0,003017422 | 0,032183412 |
| Gm42640    | 2,026663503 | 0,009005694 | 0,06773998  |
| Il1rap     | 2,024324618 | 2,78865E-06 | 0,000130117 |
| Acta2      | 2,005980587 | 4,32025E-06 | 0,000190998 |
| Zflx3      | 2,000063776 | 0,001504633 | 0,019665872 |
| Gpr137b    | 1,998977139 | 0,003096919 | 0,032676558 |
| Serpib8    | 1,997020743 | 0,00061588  | 0,010231821 |
| Smim3      | 1,996753879 | 0,006481454 | 0,055264359 |
| Fgf11      | 1,996368383 | 0,001113975 | 0,016081258 |
| Prss23     | 1,996193667 | 0,008062855 | 0,063795758 |
| Unc13b     | 1,9907909   | 0,001706179 | 0,021490084 |
| St6galnac3 | 1,987550175 | 0,003078961 | 0,032525891 |
| Irx3       | 1,98058756  | 0,005350039 | 0,048344455 |
| Pde8a      | 1,980578533 | 0,002622931 | 0,029135626 |
| Tmeff1     | 1,978159198 | 0,00228606  | 0,026430169 |
| Tcp1l12    | 1,976438472 | 0,000613593 | 0,010207695 |
| Gm43430    | 1,973216163 | 0,008670874 | 0,066367116 |
| Pdzd2      | 1,971382052 | 8,24893E-05 | 0,002126444 |
| Fam222a    | 1,969354167 | 9,47971E-05 | 0,002361116 |
| Gm43484    | 1,959450141 | 0,006556172 | 0,055659792 |
| Sema4c     | 1,958572217 | 4,16926E-09 | 5,22902E-07 |
| Zfpm1      | 1,956538208 | 0,002266551 | 0,026248646 |
| Rbms1      | 1,953639098 | 0,009947537 | 0,072219698 |
| Cers4      | 1,953628183 | 0,001380109 | 0,018322703 |
| Zbtb38     | 1,950717254 | 1,13141E-07 | 9,34949E-06 |

|                      |             |             |             |
|----------------------|-------------|-------------|-------------|
| <b>Nid1</b>          | 1,950461923 | 0,003780304 | 0,037528688 |
| <b>Tspan13</b>       | 1,947376207 | 0,000160285 | 0,003556442 |
| <b>Zeb2</b>          | 1,947327821 | 0,000201276 | 0,004252518 |
| <b>Cadm1</b>         | 1,942662031 | 0,00171285  | 0,021558751 |
| <b>Sorbs2</b>        | 1,942548859 | 0,001725612 | 0,021673222 |
| <b>Egfl7</b>         | 1,936442519 | 0,006163705 | 0,053525465 |
| <b>Sirt2</b>         | 1,935845208 | 0,000993036 | 0,014707574 |
| <b>Farp1</b>         | 1,931165581 | 2,93345E-05 | 0,000918143 |
| <b>Slc9a9</b>        | 1,931088534 | 0,000219012 | 0,004508738 |
| <b>Fam110b</b>       | 1,929264483 | 3,75352E-05 | 0,001125038 |
| <b>Mgll</b>          | 1,92910671  | 0,002700593 | 0,029773865 |
| <b>Shkbp1</b>        | 1,918410684 | 1,99352E-05 | 0,000679258 |
| <b>Csrp1</b>         | 1,915768258 | 0,00014131  | 0,003283737 |
| <b>Palm</b>          | 1,91053692  | 1,60318E-05 | 0,00056415  |
| <b>Snx30</b>         | 1,907110233 | 0,000869948 | 0,01337753  |
| <b>Ophn1</b>         | 1,904071649 | 0,001045914 | 0,015285899 |
| <b>Ddit3</b>         | 1,899559621 | 0,002796959 | 0,030437794 |
| <b>Ggact</b>         | 1,897315704 | 0,00125715  | 0,01730073  |
| <b>E230029C05Rik</b> | 1,895800304 | 0,000776937 | 0,012319637 |
| <b>Setbp1</b>        | 1,887019276 | 0,006252102 | 0,054038206 |
| <b>Nav1</b>          | 1,886129252 | 0,000711606 | 0,011450454 |
| <b>Dock11</b>        | 1,8845149   | 2,24154E-05 | 0,000740923 |
| <b>5830487J09Rik</b> | 1,877423767 | 0,003734648 | 0,037333814 |
| <b>Slc25a13</b>      | 1,874731604 | 0,001597506 | 0,020500942 |
| <b>Rarg</b>          | 1,873647743 | 5,93685E-05 | 0,001612707 |
| <b>Gpx7</b>          | 1,868690041 | 0,009948382 | 0,072219698 |
| <b>Gm37968</b>       | 1,866297252 | 0,003946416 | 0,038706829 |
| <b>Grid1</b>         | 1,858946496 | 0,000417502 | 0,00755691  |
| <b>Emp1</b>          | 1,858278909 | 0,001261973 | 0,017337424 |
| <b>Rgs3</b>          | 1,854030796 | 0,006132304 | 0,053341696 |
| <b>Nenf</b>          | 1,853304078 | 2,53282E-05 | 0,000814372 |
| <b>Gm15666</b>       | 1,850301378 | 0,000253786 | 0,005056683 |
| <b>Spg21</b>         | 1,843722878 | 0,006200097 | 0,053719999 |
| <b>Tgfb3</b>         | 1,842342673 | 0,001900531 | 0,02320132  |
| <b>Iqgap1</b>        | 1,840475628 | 9,37818E-06 | 0,000362104 |
| <b>Ppp1r16b</b>      | 1,839307149 | 0,001606755 | 0,020574837 |
| <b>Wipf1</b>         | 1,838301685 | 0,00978253  | 0,071514785 |
| <b>Ifitm10</b>       | 1,837964856 | 0,003691143 | 0,037013608 |
| <b>Usp53</b>         | 1,836200715 | 0,001950305 | 0,023593009 |
| <b>Snx1</b>          | 1,827158757 | 0,000536485 | 0,009175244 |
| <b>Phlda1</b>        | 1,820018939 | 8,21922E-06 | 0,000324439 |
| <b>Socs3</b>         | 1,815559226 | 0,008438465 | 0,065564947 |
| <b>Nfic</b>          | 1,814386154 | 3,48366E-06 | 0,000156756 |
| <b>Ankrd39</b>       | 1,804380234 | 0,002457453 | 0,027750699 |
| <b>Ppp3cc</b>        | 1,801828    | 0,001676322 | 0,021181812 |
| <b>Rab15</b>         | 1,801443493 | 0,007157679 | 0,058790707 |
| <b>Tmem176a</b>      | 1,801212408 | 0,008771645 | 0,066688635 |
| <b>Endod1</b>        | 1,795315442 | 0,000251755 | 0,005030541 |
| <b>Hebp1</b>         | 1,791522387 | 0,001530841 | 0,019890806 |
| <b>Mfge8</b>         | 1,788023178 | 0,000463431 | 0,00819532  |
| <b>Lmna</b>          | 1,773495258 | 0,005006711 | 0,046210168 |
| <b>Rsad2</b>         | 1,773354837 | 0,001921094 | 0,023364941 |
| <b>Ifi27</b>         | 1,77187304  | 2,22075E-05 | 0,000736699 |
| <b>Parp8</b>         | 1,770417247 | 0,00137981  | 0,018322703 |
| <b>Skil</b>          | 1,762728415 | 5,54432E-06 | 0,000235687 |
| <b>Fam20c</b>        | 1,753905814 | 0,002923401 | 0,031407909 |
| <b>Dsty</b>          | 1,74580051  | 0,005600161 | 0,05007991  |

|               |             |             |             |
|---------------|-------------|-------------|-------------|
| Atp9a         | 1,729417385 | 0,000111735 | 0,002706731 |
| Tmem176b      | 1,72878914  | 0,003801502 | 0,037682602 |
| Evl           | 1,727652586 | 0,000344795 | 0,006479657 |
| Rhoc          | 1,717542747 | 1,76967E-06 | 9,17737E-05 |
| Mmp14         | 1,712585109 | 0,000292278 | 0,005618099 |
| Rflnb         | 1,7124162   | 0,003281971 | 0,034075081 |
| St3gal5       | 1,709911934 | 0,009270579 | 0,06908593  |
| Gm38020       | 1,707775152 | 0,009421569 | 0,069917524 |
| Cep128        | 1,707513964 | 0,001255973 | 0,017297991 |
| Irak4         | 1,706099361 | 0,001148318 | 0,016389709 |
| Basp1         | 1,698077316 | 0,000204863 | 0,00430172  |
| Slc44a1       | 1,693642094 | 0,002137466 | 0,02513228  |
| Man1c1        | 1,684534427 | 0,000206679 | 0,004325347 |
| Plekhg3       | 1,684149523 | 0,001242745 | 0,017183464 |
| Lyst          | 1,674015786 | 0,005819784 | 0,051447254 |
| Rnd2          | 1,673274082 | 0,00785884  | 0,062716043 |
| Timp3         | 1,672096534 | 0,001552501 | 0,020098409 |
| Rpsa-ps10     | 1,665571833 | 0,000501709 | 0,00865732  |
| Glee          | 1,654771792 | 0,00617125  | 0,053548767 |
| Mfsd6         | 1,6395233   | 0,003859945 | 0,038069861 |
| Pacs2         | 1,63265691  | 0,004633252 | 0,043582145 |
| Gm16536       | 1,617766912 | 0,004129049 | 0,039980136 |
| Arhgef10      | 1,615887518 | 0,004733787 | 0,04422202  |
| My19          | 1,614348934 | 0,000862148 | 0,013292259 |
| Kcnq1ot1      | 1,61296927  | 0,006894213 | 0,057292919 |
| Ammecr1       | 1,607009365 | 0,006569479 | 0,055692554 |
| Tmcc2         | 1,603988712 | 0,001002121 | 0,014804939 |
| Rhoj          | 1,590055945 | 0,006303321 | 0,05429514  |
| Acot8         | 1,587052563 | 0,006704866 | 0,056407634 |
| Msr3          | 1,580839604 | 0,00052709  | 0,009032029 |
| Hspg2         | 1,579563421 | 0,001732325 | 0,021711147 |
| Chd9          | 1,57848236  | 0,000915265 | 0,01386937  |
| Samd14        | 1,576781766 | 0,000122868 | 0,002932254 |
| Atp1a1        | 1,576187032 | 0,004287147 | 0,040970398 |
| B2m           | 1,572340457 | 0,000260429 | 0,005151478 |
| Cmtr1         | 1,563984244 | 9,60933E-05 | 0,002390033 |
| Unc93b1       | 1,559059534 | 0,00062468  | 0,010304887 |
| Slc22a15      | 1,554728549 | 0,009324137 | 0,069368129 |
| Zfyve26       | 1,544699356 | 0,004909403 | 0,0454782   |
| Tpcn1         | 1,540365474 | 0,006373711 | 0,054736369 |
| Spef1         | 1,531203701 | 2,96806E-05 | 0,000927336 |
| Trim2         | 1,525608508 | 0,001128471 | 0,016184821 |
| Stk39         | 1,524860818 | 0,003497089 | 0,035705848 |
| Bpgm          | 1,51758802  | 5,97021E-05 | 0,001619282 |
| Arpc1b        | 1,514789465 | 0,001163713 | 0,016556001 |
| Parp9         | 1,513578284 | 0,00357021  | 0,036181521 |
| St5           | 1,513107837 | 0,003804802 | 0,03769418  |
| Piezo2        | 1,498465691 | 0,003430572 | 0,035181429 |
| Adra1b        | 1,497008579 | 0,008278634 | 0,064835853 |
| 2810013P06Rik | 1,479770473 | 0,006927519 | 0,057514671 |
| Scrn1         | 1,476598848 | 0,003478677 | 0,035600068 |
| 6330418K02Rik | 1,474819637 | 0,002531961 | 0,028374647 |
| Tbc1d22a      | 1,470628723 | 0,004287474 | 0,040970398 |
| Gga2          | 1,458672681 | 0,003923217 | 0,038564849 |
| Slc29a3       | 1,458607524 | 0,009594852 | 0,070904871 |
| Pnpla3        | 1,45198502  | 0,007785672 | 0,062327668 |
| Fnip1         | 1,445161269 | 0,001203901 | 0,016883255 |

|               |             |             |             |
|---------------|-------------|-------------|-------------|
| Atp6v0e       | 1,440591251 | 0,003250139 | 0,033868864 |
| Lama4         | 1,439410739 | 0,008824722 | 0,066919551 |
| Axl           | 1,438274487 | 0,009399461 | 0,069811034 |
| Lockd         | 1,416706792 | 0,00699322  | 0,057882169 |
| Sept8         | 1,412545496 | 0,008196706 | 0,06445111  |
| Bscl2         | 1,407182222 | 0,000316744 | 0,005984302 |
| Ddx58         | 1,406518702 | 0,00876385  | 0,066681367 |
| Ift46         | 1,371512367 | 0,000777309 | 0,012319637 |
| Dab2          | 1,368583134 | 0,008114503 | 0,064088194 |
| Klhl5         | 1,363643434 | 0,00236268  | 0,027078179 |
| Dcaf6         | 1,360330925 | 0,005064597 | 0,046505123 |
| Dpysl3        | 1,348673103 | 7,69522E-05 | 0,00201305  |
| Plxnd1        | 1,341774125 | 0,008011306 | 0,063530015 |
| Dpysl4        | 1,321987558 | 0,008628573 | 0,066367116 |
| Map3k3        | 1,315067315 | 0,009446431 | 0,070042219 |
| Akap13        | 1,313167457 | 0,008027858 | 0,063604234 |
| Inpp5k        | 1,306327227 | 0,003191545 | 0,033455412 |
| Rogdi         | 1,293983607 | 0,009961629 | 0,072240214 |
| Ezh1          | 1,273253824 | 0,003381057 | 0,03484301  |
| Ncoa7         | 1,27203917  | 0,00356253  | 0,036144452 |
| Coq10a        | 1,269933323 | 0,004098505 | 0,039779347 |
| Hsd17b11      | 1,26690523  | 0,007597399 | 0,061101495 |
| Smardc2       | 1,264464209 | 0,00355337  | 0,036080149 |
| Zfp608        | 1,263297883 | 0,000969857 | 0,014461173 |
| Card19        | 1,261135286 | 0,000968539 | 0,014461173 |
| Tns1          | 1,260743042 | 0,00340969  | 0,035035997 |
| Scamp2        | 1,259683507 | 0,001590794 | 0,020468509 |
| Rora          | 1,259332486 | 0,001064318 | 0,015474971 |
| Txndc16       | 1,235900141 | 0,008385967 | 0,065392578 |
| Cd47          | 1,23571295  | 0,008639197 | 0,066367116 |
| Tuba1c        | 1,232073158 | 2,63873E-05 | 0,000839268 |
| Dym           | 1,2285167   | 0,004560412 | 0,04301137  |
| BC017643      | 1,223992675 | 0,004570589 | 0,043084381 |
| Arid5a        | 1,220649441 | 0,007012112 | 0,057973585 |
| App           | 1,220362404 | 0,001420823 | 0,018750625 |
| Map1lc3b      | 1,217685464 | 0,004621274 | 0,043492606 |
| Blvra         | 1,197289222 | 0,000334218 | 0,006294262 |
| Urm1          | 1,190845118 | 0,008121652 | 0,064088932 |
| Tpm1          | 1,190158181 | 0,008260549 | 0,064821504 |
| Wdr81         | 1,184949919 | 0,002390867 | 0,027277476 |
| Strbp         | 1,183480325 | 0,006112242 | 0,053265475 |
| Gsn           | 1,182782329 | 0,008765741 | 0,066681367 |
| Gm10478       | 1,182774459 | 0,000609947 | 0,01016607  |
| Sec61a1       | 1,179383272 | 0,000551705 | 0,00937209  |
| E130308A19Rik | 1,17813815  | 0,001429716 | 0,018839858 |
| Hist3h2a      | 1,175142506 | 0,00254103  | 0,028458252 |
| Hipk3         | 1,163794865 | 0,009748324 | 0,071323688 |
| Der1l         | 1,154350604 | 0,001648336 | 0,020942429 |
| Rassf1        | 1,148614588 | 0,005882228 | 0,051803449 |
| 5031439G07Rik | 1,141358164 | 0,002415245 | 0,027396535 |
| Pik3r1        | 1,134219507 | 0,003201167 | 0,033516545 |
| Cbx4          | 1,112059207 | 0,004849824 | 0,045052572 |
| Hltf          | 1,101833226 | 0,008713197 | 0,066472899 |
| Acvr1         | 1,09784783  | 0,006677835 | 0,056233731 |
| Soat1         | 1,085927258 | 0,008415932 | 0,065533837 |
| Irf1          | 1,081247697 | 0,001642206 | 0,020892638 |
| Camsap2       | 1,079256728 | 0,00640048  | 0,054865921 |

|               |              |             |             |
|---------------|--------------|-------------|-------------|
| Lats2         | 1,07724693   | 0,008144165 | 0,064237921 |
| Nr2c2         | 1,068729857  | 0,007983673 | 0,063424655 |
| Wdr6          | 1,064074272  | 0,006320695 | 0,054375694 |
| Slc44a2       | 1,062768055  | 0,00382125  | 0,037814766 |
| Rictor        | 1,056550282  | 0,003599816 | 0,036418274 |
| Tgoln1        | 1,056263587  | 0,003482737 | 0,035621009 |
| Rnpepl1       | 1,044204125  | 0,002272604 | 0,026301521 |
| R3hdm4        | 1,036681792  | 0,007395558 | 0,060074899 |
| Vdac2         | -1,004102785 | 0,001916418 | 0,023348291 |
| Atad1         | -1,008498158 | 0,002411602 | 0,02737965  |
| Sdha          | -1,012999367 | 0,00880821  | 0,066836179 |
| Maml2         | -1,013626188 | 0,005302326 | 0,048060652 |
| Sac3d1        | -1,02204165  | 0,006284379 | 0,054202212 |
| Mrpl2         | -1,023966089 | 0,004183796 | 0,040297521 |
| Nt5c          | -1,029575282 | 0,009967062 | 0,072240214 |
| Cd81          | -1,031878128 | 0,000391504 | 0,00718256  |
| 1110065P20Rik | -1,038790268 | 0,005341199 | 0,048313949 |
| Nadk          | -1,039625263 | 0,005550749 | 0,049801848 |
| Gclm          | -1,040728818 | 0,002399104 | 0,027337082 |
| Pip4k2b       | -1,041974347 | 0,005644849 | 0,050415916 |
| Nus1          | -1,042630409 | 0,001291058 | 0,017562365 |
| Slc25a3       | -1,044215932 | 0,005702208 | 0,050748793 |
| Ccdc141       | -1,055114711 | 0,006881943 | 0,057292919 |
| Nuded2        | -1,062351768 | 0,002192158 | 0,025572406 |
| Mrps22        | -1,065579563 | 0,002673157 | 0,029582051 |
| Lzic          | -1,068355308 | 0,00364601  | 0,036704228 |
| Ier5l         | -1,077861626 | 0,005507147 | 0,04951113  |
| Atp13a3       | -1,078244782 | 0,005048401 | 0,046468775 |
| Nol9          | -1,094027435 | 0,00471705  | 0,044112275 |
| Chn2          | -1,094513266 | 0,007943121 | 0,063216088 |
| Atp5c1        | -1,095545391 | 0,003633912 | 0,036679281 |
| Rps27l        | -1,102757401 | 0,001404359 | 0,018574934 |
| Snx3          | -1,103921947 | 0,004158168 | 0,040138126 |
| Pex7          | -1,104731335 | 0,006106535 | 0,0532485   |
| Crls1         | -1,106459133 | 0,009837452 | 0,071649712 |
| Zbtb25        | -1,110635376 | 0,009054843 | 0,067878698 |
| Mrps30        | -1,110815001 | 0,000657498 | 0,010785891 |
| Elovl5        | -1,11694566  | 0,003409102 | 0,035035997 |
| Fkbp3         | -1,118021577 | 0,002341706 | 0,026907552 |
| 9430015G10Rik | -1,120365475 | 0,009631819 | 0,070916252 |
| Chchd4        | -1,125652308 | 0,002068941 | 0,024571881 |
| Bola1         | -1,128662954 | 0,00950682  | 0,070430923 |
| 4632415L05Rik | -1,132050888 | 0,007963786 | 0,063295096 |
| Cisd1         | -1,133414036 | 0,006954973 | 0,057715506 |
| Fbxl15        | -1,13650583  | 0,008344655 | 0,065237344 |
| Mdh1          | -1,139666048 | 0,004077011 | 0,039614209 |
| Ndufb6        | -1,139940444 | 0,00570896  | 0,050766896 |
| Igbp1         | -1,141970209 | 0,008632874 | 0,066367116 |
| Syde1         | -1,143288765 | 0,002011801 | 0,024079832 |
| Nln           | -1,143411362 | 0,004377884 | 0,041690088 |
| Eci1          | -1,143614781 | 0,008534815 | 0,066023475 |
| Ptcd2         | -1,146774808 | 0,001753931 | 0,021888864 |
| Dld           | -1,148212696 | 0,004888416 | 0,045378871 |
| C1qbp         | -1,151859458 | 0,000543262 | 0,009246437 |
| Ap3m2         | -1,15578516  | 0,003643079 | 0,036704228 |
| Serpine2      | -1,156350304 | 0,003156086 | 0,033122986 |
| Chd1l         | -1,159178624 | 0,002858823 | 0,030864121 |



|               |              |             |             |
|---------------|--------------|-------------|-------------|
| Zfp598        | -1,159429674 | 0,002114624 | 0,024946634 |
| Ablim1        | -1,170609408 | 0,007806372 | 0,062436856 |
| Ndufv2        | -1,171643385 | 0,003114019 | 0,032778756 |
| Etfa          | -1,173293951 | 0,008272639 | 0,064826761 |
| Suclg1        | -1,176066183 | 0,001727858 | 0,021680258 |
| Calm2         | -1,176536247 | 0,003059913 | 0,032421512 |
| Ppa2          | -1,187074519 | 0,000995584 | 0,014732982 |
| Sf3b4         | -1,188553834 | 0,001892678 | 0,023162714 |
| 2810403A07Rik | -1,19084415  | 0,001116799 | 0,016091303 |
| Daam1         | -1,197677505 | 0,001217652 | 0,01700866  |
| Pdha1         | -1,206421429 | 0,0088885   | 0,067089521 |
| Naca          | -1,206555241 | 0,002399183 | 0,027337082 |
| Nudt19        | -1,210067658 | 0,007250659 | 0,05925169  |
| Fh1           | -1,211679176 | 0,00064572  | 0,010632134 |
| Rpl36al       | -1,211955902 | 0,009893773 | 0,071911826 |
| Gstcd         | -1,218228609 | 0,006882676 | 0,057292919 |
| Rrp1b         | -1,221908368 | 0,004089808 | 0,03971673  |
| Zkscan17      | -1,225936029 | 0,007762097 | 0,062167084 |
| Hdhd2         | -1,22684703  | 0,008437607 | 0,065564947 |
| Sucla2        | -1,229485701 | 0,003794581 | 0,037635096 |
| Dhx33         | -1,237602046 | 0,003633684 | 0,036679281 |
| Hspa9         | -1,242210143 | 0,001950519 | 0,023593009 |
| Nob1          | -1,246079133 | 0,006424469 | 0,054942936 |
| Etfrf1        | -1,247285229 | 0,008712924 | 0,066472899 |
| Mvd           | -1,247507835 | 0,009052813 | 0,067878698 |
| Mrps31        | -1,253134012 | 0,00277398  | 0,030262223 |
| Mcat          | -1,263279711 | 0,009612329 | 0,070916221 |
| Spag7         | -1,264137104 | 0,003677506 | 0,036929593 |
| Gbas          | -1,26495399  | 0,002706995 | 0,029807282 |
| Frat2         | -1,268975065 | 0,002691457 | 0,029730672 |
| Ndufc1        | -1,270437251 | 0,003777202 | 0,037528688 |
| Nt5m          | -1,272176403 | 0,006799643 | 0,056932121 |
| Nsa2          | -1,274533019 | 0,008103736 | 0,064033275 |
| Fdft1         | -1,279200986 | 0,008223014 | 0,064600522 |
| Lrpprc        | -1,282793274 | 0,000837062 | 0,013053441 |
| Dlst          | -1,283386947 | 0,008626006 | 0,066367116 |
| Stim2         | -1,286591027 | 0,00501174  | 0,046232455 |
| 1700037H04Rik | -1,290266053 | 0,001170552 | 0,016587423 |
| Ahcy11        | -1,290414419 | 0,007069916 | 0,058259268 |
| Ndufa4        | -1,29072933  | 0,00428607  | 0,040970398 |
| Swap70        | -1,296253587 | 0,007373164 | 0,059920514 |
| Pmvk          | -1,297667401 | 0,003029342 | 0,032271617 |
| Zeb1          | -1,29787423  | 0,009147771 | 0,068344726 |
| Mvk           | -1,300539736 | 0,00482451  | 0,044898526 |
| Ptrf          | -1,302400608 | 0,001725622 | 0,021673222 |
| Crot          | -1,308565884 | 0,004906454 | 0,045474701 |
| Atpaf2        | -1,313110485 | 0,006420141 | 0,054942936 |
| Ssbp2         | -1,313682983 | 0,008526627 | 0,065989004 |
| Cox5a         | -1,31686852  | 0,002588967 | 0,02884896  |
| Fam185a       | -1,318662807 | 0,007186572 | 0,058973246 |
| Manea         | -1,329960263 | 0,007487136 | 0,060511119 |
| Mkl2          | -1,335718954 | 8,42083E-05 | 0,002164447 |
| Surf2         | -1,341789549 | 0,002403179 | 0,02734737  |
| Chchd3        | -1,343271735 | 0,001920332 | 0,023364941 |
| Snhg8         | -1,346968621 | 0,001477557 | 0,019354907 |
| Frat1         | -1,349597166 | 0,006590793 | 0,05580096  |
| Hibadh        | -1,349946146 | 0,000537573 | 0,009184971 |

|                      |              |             |             |
|----------------------|--------------|-------------|-------------|
| <b>Cox6b1</b>        | -1,350567421 | 0,00847008  | 0,065705572 |
| <b>Ndufs3</b>        | -1,353328546 | 0,007122391 | 0,058575013 |
| <b>Rnf122</b>        | -1,355979167 | 0,000692    | 0,011196094 |
| <b>Sall2</b>         | -1,357838938 | 0,001387141 | 0,018374683 |
| <b>Hus1</b>          | -1,358946842 | 0,007257831 | 0,0592829   |
| <b>Ndufb5</b>        | -1,362886735 | 0,000492512 | 0,008564003 |
| <b>Sdhc</b>          | -1,365004066 | 0,007228248 | 0,059207052 |
| <b>Pycrl</b>         | -1,366498132 | 0,005459514 | 0,049182905 |
| <b>Coq9</b>          | -1,366791391 | 0,001130232 | 0,016196945 |
| <b>Etf1h</b>         | -1,36893463  | 0,001660006 | 0,021030215 |
| <b>Mmab</b>          | -1,369273799 | 0,005465511 | 0,049186817 |
| <b>Cox8a</b>         | -1,371523836 | 0,003640569 | 0,036704228 |
| <b>Qdpr</b>          | -1,375885093 | 9,16688E-05 | 0,002296135 |
| <b>Vkorc1l1</b>      | -1,376134648 | 0,006060879 | 0,052981013 |
| <b>Mef2c</b>         | -1,377473186 | 0,004823174 | 0,044898526 |
| <b>Abhd17b</b>       | -1,380547983 | 0,001697099 | 0,021390949 |
| <b>Ppp5c</b>         | -1,381891944 | 0,000484599 | 0,008493204 |
| <b>Rsl24d1</b>       | -1,385850402 | 0,002193402 | 0,025572406 |
| <b>Cdh20</b>         | -1,3860948   | 0,006379306 | 0,054736369 |
| <b>Idh3b</b>         | -1,392430336 | 0,008270155 | 0,064826761 |
| <b>Nars2</b>         | -1,3936773   | 0,005823307 | 0,051447254 |
| <b>Asph</b>          | -1,402612041 | 0,002784453 | 0,030339045 |
| <b>Hat1</b>          | -1,40363432  | 0,000622173 | 0,010292329 |
| <b>Atp5b</b>         | -1,403810014 | 0,000221801 | 0,004539731 |
| <b>Pomt1</b>         | -1,41581856  | 0,006049012 | 0,052929601 |
| <b>Vasn</b>          | -1,419130861 | 0,006174929 | 0,05355441  |
| <b>Metrn1</b>        | -1,42150716  | 0,002703993 | 0,029792778 |
| <b>Pigp</b>          | -1,422464478 | 0,000592926 | 0,00994253  |
| <b>Sod2</b>          | -1,423410659 | 0,003405364 | 0,035032263 |
| <b>Insig1</b>        | -1,425801472 | 0,000412722 | 0,007478043 |
| <b>Gfm1</b>          | -1,426749713 | 0,000121285 | 0,002902297 |
| <b>E2f6</b>          | -1,433501405 | 0,002722469 | 0,029854469 |
| <b>Rps2</b>          | -1,439051031 | 0,009145576 | 0,068344726 |
| <b>Zfp770</b>        | -1,441119299 | 0,00015959  | 0,003551386 |
| <b>Idh3a</b>         | -1,443575775 | 0,000689774 | 0,011170295 |
| <b>Cyp51</b>         | -1,449255838 | 0,002028858 | 0,024176766 |
| <b>Ipo11</b>         | -1,450089788 | 0,002852709 | 0,030816925 |
| <b>Ddias</b>         | -1,457697309 | 0,002088095 | 0,024732667 |
| <b>Got1</b>          | -1,461203873 | 0,000769604 | 0,012238923 |
| <b>Cdc42ep1</b>      | -1,464479108 | 0,005774125 | 0,051080355 |
| <b>Echdc1</b>        | -1,466474079 | 0,001867151 | 0,022913735 |
| <b>D930015E06Rik</b> | -1,473187541 | 0,006644074 | 0,056082964 |
| <b>Cldnd1</b>        | -1,48190953  | 0,000943395 | 0,014150124 |
| <b>Ppp1r14b</b>      | -1,487026038 | 1,05492E-05 | 0,000398617 |
| <b>Kctd1</b>         | -1,487217919 | 9,22455E-05 | 0,002307312 |
| <b>Dhcr24</b>        | -1,492493625 | 0,00217253  | 0,025443059 |
| <b>1110038B12Rik</b> | -1,492833846 | 0,001245714 | 0,017183464 |
| <b>Acer3</b>         | -1,50001224  | 0,001793149 | 0,022257813 |
| <b>Scrn3</b>         | -1,500244508 | 0,00117499  | 0,016622821 |
| <b>Gng5</b>          | -1,502384688 | 0,006869183 | 0,057272336 |
| <b>Rbmx1l</b>        | -1,510115391 | 0,00794712  | 0,063219468 |
| <b>Mical2</b>        | -1,515736845 | 0,00688373  | 0,057292919 |
| <b>Mto1</b>          | -1,520574541 | 0,001214133 | 0,016986341 |
| <b>Zwint</b>         | -1,526486778 | 6,99066E-05 | 0,001850642 |
| <b>Plk2</b>          | -1,537292003 | 0,005657985 | 0,050482243 |
| <b>Zbtb46</b>        | -1,538903849 | 0,003780138 | 0,037528688 |
| <b>mt-Nd1</b>        | -1,54053171  | 0,001423298 | 0,018769274 |

|          |              |             |             |
|----------|--------------|-------------|-------------|
| Fdps     | -1,541936102 | 0,007761707 | 0,062167084 |
| Ube2a    | -1,550271157 | 3,96389E-05 | 0,001169937 |
| Tlr3     | -1,556789972 | 0,004139003 | 0,040040552 |
| Rpl38    | -1,557640325 | 0,001786007 | 0,022202057 |
| Gas1     | -1,560804724 | 0,008833016 | 0,06694051  |
| Arhgap18 | -1,56352366  | 0,000309961 | 0,005900273 |
| Mrps21   | -1,564355983 | 0,008256683 | 0,064821504 |
| Ptgr2    | -1,567590115 | 0,009498669 | 0,070400023 |
| Sms      | -1,572547244 | 0,001171813 | 0,016591149 |
| Cox15    | -1,574497014 | 0,008855799 | 0,06694051  |
| Clybl    | -1,574802698 | 0,004733057 | 0,04422202  |
| Aco2     | -1,58029644  | 0,001023906 | 0,01503883  |
| Hadhb    | -1,584130146 | 0,009648524 | 0,070916252 |
| Atp5g3   | -1,58744524  | 7,59051E-05 | 0,0019886   |
| Lyn      | -1,591132472 | 0,002147517 | 0,025200187 |
| Amer2    | -1,602826488 | 0,006696608 | 0,056364977 |
| Pisd     | -1,605306786 | 0,00011926  | 0,002861594 |
| Cd1d1    | -1,606614378 | 0,003469372 | 0,035525403 |
| Dlat     | -1,612993237 | 3,19074E-05 | 0,000986451 |
| Jam2     | -1,615139011 | 0,001141732 | 0,016325224 |
| Spata24  | -1,615257548 | 0,003170588 | 0,033255443 |
| Tlcd1    | -1,62008051  | 0,000226057 | 0,004605518 |
| Cox7b    | -1,621042507 | 0,000186077 | 0,003993434 |
| Dnajb5   | -1,626677013 | 0,000123456 | 0,002938364 |
| Cd109    | -1,629064805 | 0,001502298 | 0,01964988  |
| Tusc3    | -1,635288004 | 0,000405548 | 0,007385907 |
| Tle6     | -1,635960402 | 0,00644106  | 0,055025942 |
| Foxred1  | -1,64280939  | 0,001058111 | 0,015407517 |
| Epdr1    | -1,643274125 | 5,37088E-08 | 4,92117E-06 |
| Nsdhl    | -1,643446854 | 0,0002347   | 0,004737939 |
| Cacna2d1 | -1,644344011 | 0,002012553 | 0,024079832 |
| Rhoq     | -1,650634309 | 7,39351E-05 | 0,001942747 |
| Jun      | -1,657920964 | 2,01358E-05 | 0,000683458 |
| Oxnad1   | -1,663012757 | 0,000448023 | 0,008005103 |
| Amt      | -1,683688864 | 0,008542264 | 0,066052209 |
| F2r      | -1,686762312 | 1,14219E-06 | 6,43264E-05 |
| Elfn1    | -1,693962776 | 0,001745184 | 0,02181048  |
| Msmo1    | -1,695049899 | 0,00030771  | 0,005863725 |
| Hibch    | -1,695265729 | 0,0022497   | 0,026133124 |
| Acot1    | -1,699456643 | 0,003506272 | 0,035737707 |
| Sp3os    | -1,709056588 | 0,002698539 | 0,029769779 |
| Phkb     | -1,721551392 | 0,00101695  | 0,014985307 |
| Satb1    | -1,7278389   | 0,000803703 | 0,012656004 |
| Pnp      | -1,73216077  | 0,000500023 | 0,008652066 |
| Cecr5    | -1,737102394 | 0,007478229 | 0,060511119 |
| Iba57    | -1,737322113 | 0,002620337 | 0,029132169 |
| Thrb     | -1,737983434 | 0,001270195 | 0,017383445 |
| Clic4    | -1,738367527 | 6,64335E-05 | 0,001774637 |
| Sema6d   | -1,742067951 | 1,04102E-05 | 0,000395051 |
| Gsto1    | -1,759318577 | 0,007661785 | 0,061502955 |
| Nudt4    | -1,764446516 | 6,42317E-05 | 0,001723632 |
| Slc9a3r1 | -1,766509037 | 0,000805502 | 0,012665154 |
| Llg1     | -1,771035615 | 0,000156246 | 0,003529285 |
| Golph3   | -1,772815169 | 3,13934E-06 | 0,000143824 |
| Nrgn     | -1,782993702 | 0,008015867 | 0,063537692 |
| Pla2g4a  | -1,786009817 | 0,005967226 | 0,052395448 |
| Stard3   | -1,804284462 | 0,003544322 | 0,036021716 |

|               |              |             |             |
|---------------|--------------|-------------|-------------|
| Acadl         | -1,808569943 | 0,003743825 | 0,03736219  |
| Esrra         | -1,810397709 | 0,000120022 | 0,002875977 |
| Igfbp3        | -1,82484033  | 0,000458871 | 0,0081414   |
| Cs            | -1,829299747 | 1,57293E-06 | 8,35308E-05 |
| B230311B06Rik | -1,832383836 | 0,009601914 | 0,070916221 |
| Depdc7        | -1,859171168 | 0,002196589 | 0,025572406 |
| Lss           | -1,862523297 | 0,007845575 | 0,062693693 |
| Myo6          | -1,868388525 | 0,000267267 | 0,005267984 |
| Atp5j         | -1,870541232 | 1,91808E-07 | 1,47202E-05 |
| Miga2         | -1,870930041 | 0,003129132 | 0,032910017 |
| Map2k1        | -1,876022924 | 0,000280917 | 0,005453066 |
| Slc25a25      | -1,884055732 | 2,41276E-05 | 0,000785768 |
| Tmem198b      | -1,892118925 | 7,23607E-06 | 0,000294703 |
| Cluh          | -1,894961763 | 3,10549E-05 | 0,000968563 |
| Srgap2        | -1,897139474 | 1,28838E-07 | 1,04036E-05 |
| B230334C09Rik | -1,901792444 | 0,002002053 | 0,024002914 |
| Psrc1         | -1,90342107  | 0,003522461 | 0,035820124 |
| Sardh         | -1,907233722 | 3,8312E-06  | 0,000170657 |
| mt-Rnr2       | -1,910957852 | 0,005463537 | 0,049186817 |
| Wbscr17       | -1,911530815 | 1,19375E-06 | 6,63843E-05 |
| Hectd2        | -1,920201051 | 0,003612761 | 0,036528344 |
| Nrxn1         | -1,930339747 | 0,000799819 | 0,012606055 |
| Akr1b10       | -1,937856703 | 0,001796258 | 0,022275612 |
| Hsdl2         | -1,948932849 | 0,007500587 | 0,060511119 |
| Tmem143       | -1,971630487 | 0,004290725 | 0,040970398 |
| Dhcr7         | -1,977698049 | 0,000190732 | 0,004068653 |
| Grip1         | -1,978503916 | 5,33328E-05 | 0,001485255 |
| Acss2         | -1,984763548 | 0,000159519 | 0,003551386 |
| 4930452B06Rik | -1,992626935 | 0,009112958 | 0,068169862 |
| Adamts14      | -1,998100254 | 0,001036713 | 0,015176522 |
| Igdcc4        | -1,999086776 | 0,000376075 | 0,006953177 |
| Chst2         | -2,007676946 | 0,001681759 | 0,021227851 |
| Ndufc2        | -2,009834696 | 9,5552E-09  | 1,10441E-06 |
| Spry1         | -2,01475902  | 0,006334863 | 0,054460725 |
| mt-Nd2        | -2,014922804 | 0,002157783 | 0,025287096 |
| Hmgcr         | -2,019350429 | 7,04789E-05 | 0,001863003 |
| Ramp1         | -2,030124421 | 0,00602861  | 0,052777196 |
| Klf10         | -2,036843432 | 0,000374758 | 0,006939505 |
| Ppif          | -2,068314423 | 7,47285E-06 | 0,000299659 |
| Usmg5         | -2,071370225 | 1,88684E-07 | 1,45707E-05 |
| Ttyh3         | -2,077011289 | 1,01854E-05 | 0,000388188 |
| Gm12166       | -2,079213875 | 0,007234197 | 0,0592188   |
| Syt7          | -2,082602686 | 0,002340743 | 0,026907552 |
| Pmm1          | -2,088014031 | 0,000277143 | 0,005412911 |
| Tmem44        | -2,091003687 | 0,000392751 | 0,007189868 |
| Frdm3         | -2,09963681  | 0,001084533 | 0,015720388 |
| Impa2         | -2,100434203 | 0,000930145 | 0,01404417  |
| Ccdc102a      | -2,10045851  | 0,000192107 | 0,004093036 |
| Gm15663       | -2,11062962  | 0,007886063 | 0,062875171 |
| Cap2          | -2,125215989 | 4,43199E-06 | 0,000193519 |
| Trim9         | -2,127630581 | 0,001467668 | 0,019268188 |
| Uqcrfs1       | -2,13362192  | 3,64311E-10 | 6,1947E-08  |
| Gpr162        | -2,15827029  | 0,001350347 | 0,018090561 |
| Spry4         | -2,159064577 | 9,13784E-08 | 7,76892E-06 |
| Suclg2        | -2,159449353 | 2,82656E-06 | 0,000131539 |
| Ccdc136       | -2,16537481  | 0,008386698 | 0,065392578 |
| Fkbp11        | -2,178083896 | 0,004516475 | 0,042642473 |

|               |              |             |             |
|---------------|--------------|-------------|-------------|
| Rai2          | -2,19359915  | 0,007572492 | 0,060983808 |
| Chrm3         | -2,201755424 | 0,007305602 | 0,059511967 |
| Ddit4l        | -2,207891102 | 0,005284908 | 0,04795124  |
| Golm1         | -2,218578475 | 2,39938E-09 | 3,11989E-07 |
| Sgsm1         | -2,221899652 | 0,006721612 | 0,056494765 |
| Spsb4         | -2,231099752 | 0,001450009 | 0,019064657 |
| Prcp          | -2,256828194 | 0,000725715 | 0,011656256 |
| Sox21         | -2,274687591 | 0,005995417 | 0,052590754 |
| Tgif2         | -2,284092576 | 0,005092741 | 0,046711634 |
| Scml4         | -2,284318812 | 0,004381571 | 0,041702744 |
| Tmem38a       | -2,289965585 | 0,003674315 | 0,036925146 |
| Nadk2         | -2,304341436 | 9,10392E-06 | 0,000355395 |
| Iqgap2        | -2,306048401 | 1,53279E-05 | 0,000543202 |
| Ier2          | -2,314992513 | 5,16253E-07 | 3,31979E-05 |
| Egr1          | -2,32951586  | 0,00420477  | 0,040381381 |
| Mrps6         | -2,337969284 | 1,25477E-06 | 6,91259E-05 |
| Lgi2          | -2,341662939 | 2,10671E-05 | 0,000708271 |
| Cecr2         | -2,361278547 | 0,007278105 | 0,059369342 |
| Nr2e1         | -2,374718365 | 0,000299483 | 0,005725466 |
| Calr3         | -2,375210337 | 0,006234978 | 0,053942934 |
| Dusp6         | -2,380104834 | 1,71762E-08 | 1,78673E-06 |
| Pbxip1        | -2,386936494 | 4,0507E-07  | 2,71336E-05 |
| Dll1          | -2,388311897 | 0,000152215 | 0,003459861 |
| Fam131a       | -2,389331733 | 7,26495E-06 | 0,000294703 |
| Cdh4          | -2,395411411 | 0,003922742 | 0,038564849 |
| Stk32c        | -2,397822224 | 0,007199164 | 0,05904917  |
| Fam212b       | -2,407409291 | 2,61539E-06 | 0,000123856 |
| Acaa2         | -2,421492409 | 0,000492482 | 0,008564003 |
| Slc15a2       | -2,424509006 | 0,000155472 | 0,003520321 |
| Fam84b        | -2,426873868 | 0,003323995 | 0,034355069 |
| Rida          | -2,43363497  | 1,94932E-06 | 9,821E-05   |
| 9030617O03Rik | -2,439066508 | 0,008081436 | 0,06391418  |
| Tfrc          | -2,439157488 | 2,32694E-06 | 0,000113048 |
| Ndp           | -2,456670532 | 2,66643E-06 | 0,000125449 |
| Atad3aos      | -2,460404065 | 0,00640061  | 0,054865921 |
| Fam195a       | -2,462832933 | 7,028E-06   | 0,000287692 |
| Slc25a5       | -2,467748502 | 1,20325E-05 | 0,00044146  |
| Foxj1         | -2,474387659 | 0,000221093 | 0,004530489 |
| Rps6ka6       | -2,477083787 | 8,30666E-06 | 0,00032716  |
| Kcne1l        | -2,481003237 | 0,009545319 | 0,070597832 |
| Opn3          | -2,481050757 | 1,83629E-05 | 0,000634238 |
| Ank2          | -2,486523083 | 0,000147441 | 0,003368663 |
| Acsbg1        | -2,487611136 | 0,006378076 | 0,054736369 |
| Clic5         | -2,488405185 | 0,00057906  | 0,009743192 |
| Agbl2         | -2,493506488 | 0,007107514 | 0,058487329 |
| Fnbp1         | -2,502321969 | 2,23625E-07 | 1,67567E-05 |
| Pde1b         | -2,536374197 | 0,000727847 | 0,011676374 |
| Kalrn         | -2,536813313 | 4,51499E-05 | 0,001291995 |
| Ccnyl1        | -2,538876929 | 0,000210322 | 0,004372312 |
| 3930402G23Rik | -2,539377099 | 0,000164823 | 0,003652537 |
| Psm3          | -2,546617423 | 0,001826915 | 0,022576632 |
| Apoo          | -2,548886312 | 0,003977361 | 0,038894531 |
| Thrsp         | -2,550654926 | 0,000101305 | 0,002498566 |
| Egr2          | -2,553266992 | 8,37379E-06 | 0,000328956 |
| Lama5         | -2,599627096 | 0,001176669 | 0,01663327  |
| Fam181b       | -2,603693535 | 3,75453E-12 | 1,14474E-09 |
| Cgref1        | -2,619360634 | 0,00257149  | 0,028726611 |

|               |              |             |             |
|---------------|--------------|-------------|-------------|
| Rprm          | -2,620200763 | 5,89084E-07 | 3,68105E-05 |
| Grm5          | -2,633809689 | 0,008838737 | 0,06694051  |
| Npvf          | -2,64668667  | 0,003766603 | 0,037499747 |
| Gdpd2         | -2,649715964 | 0,007348363 | 0,05978371  |
| Upp1          | -2,652933722 | 0,000249567 | 0,004998121 |
| Retsat        | -2,67145757  | 0,00039154  | 0,00718256  |
| Ccnd2         | -2,671529535 | 1,9977E-08  | 2,05391E-06 |
| Slc6a1        | -2,689010019 | 5,88583E-05 | 0,001606272 |
| Peg12         | -2,711271751 | 0,001234793 | 0,017180238 |
| A1593442      | -2,73087371  | 2,49063E-05 | 0,000803728 |
| Slc27a1       | -2,743500263 | 2,85901E-05 | 0,000901224 |
| Sez6          | -2,749006994 | 0,00232394  | 0,026773002 |
| Il15ra        | -2,763314284 | 0,000796297 | 0,012579157 |
| Arap2         | -2,788429335 | 3,67551E-08 | 3,51339E-06 |
| Apln          | -2,808609249 | 8,23413E-05 | 0,002125729 |
| Lrig1         | -2,848298404 | 0,000107823 | 0,002626376 |
| Smpdl3b       | -2,858527206 | 0,000445482 | 0,007999246 |
| 2010204K13Rik | -2,862770449 | 0,000218279 | 0,004498892 |
| Grial         | -2,878123456 | 0,004922383 | 0,045574568 |
| Igfbp4        | -2,882633134 | 4,93387E-07 | 3,19599E-05 |
| Arhgap29      | -2,891694823 | 8,18769E-06 | 0,000323917 |
| Kcnd3         | -2,906228159 | 0,002659084 | 0,029463186 |
| Dusp5         | -2,906648444 | 6,55027E-07 | 4,02205E-05 |
| Ndr4          | -2,907821096 | 0,001960565 | 0,023665958 |
| Camk2b        | -2,90799365  | 5,53356E-06 | 0,000235687 |
| Peg3          | -2,913412037 | 2,90521E-05 | 0,000910917 |
| Slc5a3        | -2,918291157 | 1,35122E-09 | 1,99124E-07 |
| Rgs16         | -2,918712796 | 0,000719654 | 0,011569414 |
| Nol4          | -2,928044853 | 0,000504482 | 0,008663248 |
| Amigo1        | -2,935651695 | 0,000253921 | 0,005056683 |
| Cdc6          | -2,949685728 | 0,001521538 | 0,019813611 |
| Plcl2         | -2,954505914 | 3,70513E-05 | 0,001112421 |
| Nwd1          | -3,021559342 | 4,21117E-07 | 2,78915E-05 |
| P2rx6         | -3,037460023 | 0,009880382 | 0,071873762 |
| Ckmt1         | -3,054506773 | 0,007278485 | 0,059369342 |
| Peg10         | -3,060623368 | 3,54616E-05 | 0,001073807 |
| Kcnc4         | -3,076390508 | 0,001243515 | 0,017183464 |
| Nkain1        | -3,086846509 | 0,009268412 | 0,06908593  |
| Glde          | -3,090696927 | 3,50914E-06 | 0,000157502 |
| Nudt12        | -3,092650759 | 8,01629E-05 | 0,002078594 |
| Zic3          | -3,092935635 | 0,005713644 | 0,050766896 |
| Cacnb2        | -3,105177959 | 0,002418386 | 0,027397017 |
| Bex2          | -3,126757118 | 0,000956153 | 0,014317196 |
| Slc1a3        | -3,151537443 | 0,000100784 | 0,002494435 |
| Vav3          | -3,169835244 | 6,18797E-16 | 4,05289E-13 |
| Adgrl2        | -3,189266904 | 3,91653E-05 | 0,001158194 |
| Agmo          | -3,189397356 | 1,21883E-05 | 0,000445326 |
| Elovl2        | -3,192003797 | 0,000313307 | 0,005939216 |
| Gpr68         | -3,214882934 | 0,000620658 | 0,010276881 |
| Svop          | -3,220143413 | 0,006314559 | 0,054365467 |
| Ebf3          | -3,234329632 | 0,009021896 | 0,06780253  |
| Pcp4l1        | -3,259178982 | 0,000272754 | 0,005341501 |
| Plcd4         | -3,279942257 | 2,16791E-05 | 0,000723346 |
| Cd36          | -3,3172275   | 0,007368257 | 0,059908168 |
| Mamdc2        | -3,339476156 | 2,37322E-06 | 0,000114926 |
| Slc4a4        | -3,349859685 | 1,16949E-05 | 0,000431759 |
| Ncs1          | -3,363246335 | 8,48037E-05 | 0,002176587 |

|                      |              |             |             |
|----------------------|--------------|-------------|-------------|
| <b>Garem2</b>        | -3,375281357 | 1,39955E-05 | 0,000503042 |
| <b>Adrb1</b>         | -3,393766867 | 1,46779E-13 | 6,1801E-11  |
| <b>Nudt17</b>        | -3,409642616 | 0,005125354 | 0,046913433 |
| <b>Dhh</b>           | -3,416532511 | 4,957E-05   | 0,001404802 |
| <b>Zic1</b>          | -3,41659964  | 3,9499E-12  | 1,1839E-09  |
| <b>Gm16010</b>       | -3,425565329 | 0,001838314 | 0,022685789 |
| <b>Bmpr1b</b>        | -3,433597728 | 6,83682E-05 | 0,001820752 |
| <b>Wnt7b</b>         | -3,441775867 | 0,000335904 | 0,006319279 |
| <b>Emc4</b>          | -3,452433536 | 0,001728634 | 0,021680258 |
| <b>Gm29508</b>       | -3,472623656 | 0,009676901 | 0,071036247 |
| <b>Nptx1</b>         | -3,473757632 | 4,89821E-07 | 3,18456E-05 |
| <b>Cntnap4</b>       | -3,489738966 | 0,007486211 | 0,060511119 |
| <b>Mlc1</b>          | -3,58869223  | 3,18502E-11 | 7,71561E-09 |
| <b>Tigar</b>         | -3,598259224 | 0,000133336 | 0,003127205 |
| <b>Slc25a18</b>      | -3,637493854 | 6,33898E-05 | 0,001706218 |
| <b>Mest</b>          | -3,650689977 | 4,63914E-06 | 0,000201569 |
| <b>Hrh1</b>          | -3,653044271 | 6,63252E-09 | 8,08893E-07 |
| <b>Lalba</b>         | -3,659138975 | 0,001524196 | 0,01982873  |
| <b>Gstt1</b>         | -3,660460004 | 1,1333E-06  | 6,42349E-05 |
| <b>Aspa</b>          | -3,694035776 | 0,002985336 | 0,031918997 |
| <b>Pipox</b>         | -3,720743883 | 0,001597488 | 0,020500942 |
| <b>Mtmr11</b>        | -3,729392004 | 4,1939E-08  | 3,92407E-06 |
| <b>Egfr</b>          | -3,746420772 | 2,2246E-05  | 0,000736699 |
| <b>Emx2</b>          | -3,761892227 | 2,08275E-05 | 0,00070155  |
| <b>Cybrd1</b>        | -3,789168451 | 0,000156586 | 0,003529285 |
| <b>Cbs</b>           | -3,797913971 | 1,70067E-08 | 1,78673E-06 |
| <b>Arxes1</b>        | -3,810129787 | 6,51051E-06 | 0,000271219 |
| <b>Ccl27a</b>        | -3,812907128 | 0,0099964   | 0,07230116  |
| <b>Card9</b>         | -3,817024425 | 0,007604863 | 0,061101495 |
| <b>Prr18</b>         | -3,830523671 | 2,31744E-09 | 3,05833E-07 |
| <b>Sell13</b>        | -3,854008072 | 4,0021E-08  | 3,80501E-06 |
| <b>Lfng</b>          | -3,956660637 | 5,97972E-15 | 3,0213E-12  |
| <b>Pou3f4</b>        | -3,970000873 | 1,00331E-12 | 3,62094E-10 |
| <b>Tns4</b>          | -3,970732475 | 0,002463389 | 0,027799977 |
| <b>Rfx4</b>          | -3,979059625 | 7,26591E-06 | 0,000294703 |
| <b>Fam181a</b>       | -4,008334536 | 1,13894E-07 | 9,3679E-06  |
| <b>Dgkk</b>          | -4,065260821 | 6,34227E-08 | 5,6231E-06  |
| <b>Gstt3</b>         | -4,081527067 | 1,47006E-07 | 1,18166E-05 |
| <b>Psd</b>           | -4,100339901 | 0,000272606 | 0,005341501 |
| <b>Fosb</b>          | -4,124157629 | 2,04155E-06 | 0,000101985 |
| <b>Serpinb5</b>      | -4,125390815 | 3,30884E-05 | 0,001016548 |
| <b>Cacng6</b>        | -4,145301207 | 0,001771425 | 0,022076024 |
| <b>Gm6145</b>        | -4,166062306 | 4,0398E-05  | 0,001183885 |
| <b>Slc9a7</b>        | -4,193286842 | 0,000687471 | 0,011143207 |
| <b>3110082J24Rik</b> | -4,202585662 | 3,40615E-10 | 5,84799E-08 |
| <b>Gabrg1</b>        | -4,312920903 | 8,21472E-12 | 2,34305E-09 |
| <b>Ttpa</b>          | -4,364022209 | 2,14E-10    | 3,90141E-08 |
| <b>Abcc12</b>        | -4,366380681 | 5,52359E-07 | 3,51595E-05 |
| <b>4933432K03Rik</b> | -4,376183933 | 0,008683921 | 0,066392762 |
| <b>Car2</b>          | -4,392298918 | 1,8841E-06  | 9,58726E-05 |
| <b>Tmem229a</b>      | -4,416143021 | 9,83111E-07 | 5,70011E-05 |
| <b>Scg5</b>          | -4,4601245   | 0,002427578 | 0,027448394 |
| <b>Gent4</b>         | -4,463469425 | 9,46197E-13 | 3,49861E-10 |
| <b>Ccno</b>          | -4,492924315 | 0,008644256 | 0,066367116 |
| <b>Fgf6</b>          | -4,531943757 | 0,00046912  | 0,00826361  |
| <b>Chst7</b>         | -4,548066656 | 5,13244E-27 | 1,5127E-23  |
| <b>BC064078</b>      | -4,558349018 | 1,94343E-10 | 3,67442E-08 |

|                  |              |             |             |
|------------------|--------------|-------------|-------------|
| <b>Ppargc1a</b>  | -4,571604826 | 6,91397E-08 | 6,05281E-06 |
| <b>Rab3b</b>     | -4,643001588 | 3,2585E-07  | 2,25974E-05 |
| <b>Tceal6</b>    | -4,717765311 | 0,005174873 | 0,047265584 |
| <b>Ano3</b>      | -4,739795189 | 1,79117E-06 | 9,21837E-05 |
| <b>F2rl1</b>     | -4,752788997 | 2,24155E-09 | 2,98042E-07 |
| <b>Dynlrb2</b>   | -4,759504419 | 0,003430865 | 0,035181429 |
| <b>Six3os1</b>   | -4,790436348 | 0,003255263 | 0,033902277 |
| <b>Gm44593</b>   | -4,826081119 | 0,003068635 | 0,032471936 |
| <b>Fam84a</b>    | -4,926685502 | 1,03917E-13 | 4,59416E-11 |
| <b>Fam189a1</b>  | -4,989186243 | 4,30477E-05 | 0,001243883 |
| <b>Kcnd3os</b>   | -4,992893515 | 2,62476E-07 | 1,88684E-05 |
| <b>Ppp1r1a</b>   | -5,023363134 | 1,16755E-08 | 1,3151E-06  |
| <b>Olfr287</b>   | -5,075605583 | 8,60424E-05 | 0,00219536  |
| <b>Lpo</b>       | -5,123769883 | 0,000157484 | 0,003538696 |
| <b>F2rl2</b>     | -5,259113302 | 0,000898293 | 0,013682523 |
| <b>Gm11549</b>   | -5,329532176 | 2,84935E-06 | 0,000131906 |
| <b>Sox1</b>      | -5,372701335 | 1,48456E-08 | 1,6008E-06  |
| <b>Gm12352</b>   | -5,417251891 | 0,000975644 | 0,014534754 |
| <b>Atp6v1e2</b>  | -5,437210564 | 0,000476887 | 0,008372023 |
| <b>Cpne7</b>     | -5,475580249 | 6,84317E-10 | 1,08049E-07 |
| <b>Rab26</b>     | -5,553429861 | 2,94342E-12 | 9,4639E-10  |
| <b>Six3</b>      | -5,673750743 | 8,10968E-06 | 0,000322999 |
| <b>Dbx2</b>      | -5,72735014  | 3,74408E-14 | 1,6977E-11  |
| <b>Plagl1</b>    | -5,812454165 | 0,000177818 | 0,003863055 |
| <b>Fgf14</b>     | -5,815905229 | 0,000134131 | 0,003137519 |
| <b>ErbB2</b>     | -5,858201887 | 4,14399E-07 | 2,76537E-05 |
| <b>Rpl21-ps8</b> | -6,166745161 | 9,79966E-06 | 0,000375102 |
| <b>Nkx6-2</b>    | -6,235752055 | 2,50711E-05 | 0,000807571 |
| <b>Golga7b</b>   | -6,343134064 | 8,98964E-11 | 1,91533E-08 |
| <b>Dyrk4</b>     | -6,343290068 | 3,43613E-07 | 2,35522E-05 |
| <b>Myh7</b>      | -6,799312621 | 3,1097E-06  | 0,000142836 |
| <b>Kcnc1</b>     | -6,825476162 | 1,09568E-25 | 2,15289E-22 |
| <b>Cplx1</b>     | -6,882210374 | 3,06235E-06 | 0,000141027 |
| <b>St6gal2</b>   | -7,314005404 | 1,57874E-07 | 1,25195E-05 |



**Supplemental List 2 – List of genes upregulated in human SEGAs as compared to control brain tissues and their enrichment values after GSEA in comparison with all genes expressed in mouse pNSC-derived SEGAs.**

| <b>PROBE</b>   | <b>RANK IN GENE LIST</b> | <b>RUNNING ES</b> | <b>CORE ENRICHMENT</b> |
|----------------|--------------------------|-------------------|------------------------|
| <b>C1qa</b>    | 3                        | 0.0010517054      | Yes                    |
| <b>Mpeg1</b>   | 9                        | 0.0019804854      | Yes                    |
| <b>Aif1</b>    | 10                       | 0.0032165793      | Yes                    |
| <b>Gpnmb</b>   | 12                       | 0.00439121        | Yes                    |
| <b>C1qc</b>    | 16                       | 0.005442916       | Yes                    |
| <b>Kcne4</b>   | 18                       | 0.006617547       | Yes                    |
| <b>Ctss</b>    | 21                       | 0.0077307154      | Yes                    |
| <b>Stab1</b>   | 26                       | 0.008720958       | Yes                    |
| <b>Fyb</b>     | 27                       | 0.009957052       | Yes                    |
| <b>Fam198b</b> | 32                       | 0.0109472945      | Yes                    |
| <b>Hcls1</b>   | 33                       | 0.012183389       | Yes                    |
| <b>Mgp</b>     | 34                       | 0.013419483       | Yes                    |
| <b>Tyrobp</b>  | 39                       | 0.014409725       | Yes                    |
| <b>Ptprc</b>   | 41                       | 0.015584356       | Yes                    |
| <b>Cd74</b>    | 44                       | 0.016697524       | Yes                    |
| <b>Cybb</b>    | 46                       | 0.017872155       | Yes                    |
| <b>C3ar1</b>   | 52                       | 0.018800935       | Yes                    |
| <b>Ms4a7</b>   | 59                       | 0.019668253       | Yes                    |
| <b>Msr1</b>    | 70                       | 0.02028972        | Yes                    |
| <b>Usp18</b>   | 74                       | 0.021341424       | Yes                    |
| <b>Clec7a</b>  | 87                       | 0.021839963       | Yes                    |
| <b>Trem2</b>   | 90                       | 0.022953132       | Yes                    |
| <b>B3gnt8</b>  | 101                      | 0.023574598       | Yes                    |
| <b>Fcer1g</b>  | 106                      | 0.02456484        | Yes                    |
| <b>Fgd2</b>    | 109                      | 0.025678009       | Yes                    |
| <b>C4b</b>     | 111                      | 0.02685264        | Yes                    |
| <b>Spi1</b>    | 113                      | 0.028027272       | Yes                    |
| <b>Hck</b>     | 116                      | 0.029140439       | Yes                    |
| <b>Sla</b>     | 122                      | 0.030069219       | Yes                    |
| <b>Lst1</b>    | 125                      | 0.031182388       | Yes                    |
| <b>Rgs1</b>    | 127                      | 0.03235702        | Yes                    |
| <b>Laptn5</b>  | 132                      | 0.03334726        | Yes                    |
| <b>Cd84</b>    | 133                      | 0.034583356       | Yes                    |
| <b>Fcgr2b</b>  | 141                      | 0.03538921        | Yes                    |
| <b>Alox5ap</b> | 145                      | 0.036440916       | Yes                    |
| <b>Irf5</b>    | 148                      | 0.03755408        | Yes                    |
| <b>Tbxas1</b>  | 149                      | 0.038790178       | Yes                    |
| <b>Rac2</b>    | 158                      | 0.03953457        | Yes                    |
| <b>Nckap1l</b> | 161                      | 0.040647738       | Yes                    |
| <b>Acp5</b>    | 167                      | 0.041576516       | Yes                    |
| <b>Ncf4</b>    | 171                      | 0.04262822        | Yes                    |
| <b>Gpr65</b>   | 172                      | 0.043864317       | Yes                    |
| <b>Hey2</b>    | 177                      | 0.04485456        | Yes                    |
| <b>Cd300lf</b> | 182                      | 0.0458448         | Yes                    |
| <b>Cd37</b>    | 184                      | 0.047019433       | Yes                    |
| <b>C1qb</b>    | 187                      | 0.048132602       | Yes                    |
| <b>Cer1</b>    | 188                      | 0.049368694       | Yes                    |
| <b>Was</b>     | 189                      | 0.05060479        | Yes                    |
| <b>Itgb4</b>   | 195                      | 0.05153357        | Yes                    |
| <b>S100a6</b>  | 196                      | 0.05276966        | Yes                    |
| <b>Wdfy4</b>   | 209                      | 0.0532682         | Yes                    |
| <b>Cd180</b>   | 215                      | 0.054196984       | Yes                    |
| <b>Cxcl9</b>   | 216                      | 0.055433076       | Yes                    |

|                      |     |             |     |
|----------------------|-----|-------------|-----|
| <b>Kcnq1</b>         | 218 | 0.05660771  | Yes |
| <b>Clec5a</b>        | 240 | 0.05655308  | Yes |
| <b>Lyl1</b>          | 242 | 0.057727713 | Yes |
| <b>Cd53</b>          | 249 | 0.05859503  | Yes |
| <b>Ly86</b>          | 254 | 0.059585273 | Yes |
| <b>Adgre1</b>        | 259 | 0.060575515 | Yes |
| <b>Ptafr</b>         | 262 | 0.061688684 | Yes |
| <b>Arhgdib</b>       | 263 | 0.06292478  | Yes |
| <b>Fermt3</b>        | 282 | 0.06305454  | Yes |
| <b>Colec12</b>       | 285 | 0.06416771  | Yes |
| <b>Col3a1</b>        | 286 | 0.065403804 | Yes |
| <b>Ccl4</b>          | 288 | 0.06657843  | Yes |
| <b>Tec</b>           | 291 | 0.0676916   | Yes |
| <b>Parvg</b>         | 299 | 0.06849746  | Yes |
| <b>Gbp5</b>          | 309 | 0.069180384 | Yes |
| <b>Gpr34</b>         | 312 | 0.07029355  | Yes |
| <b>F13a1</b>         | 313 | 0.07152965  | Yes |
| <b>Dock2</b>         | 316 | 0.07264282  | Yes |
| <b>Tnfaip812</b>     | 319 | 0.07375599  | Yes |
| <b>P4ha3</b>         | 323 | 0.07480769  | Yes |
| <b>C5ar1</b>         | 344 | 0.07481453  | Yes |
| <b>Col8a1</b>        | 354 | 0.075497456 | Yes |
| <b>Myo1f</b>         | 369 | 0.07587307  | Yes |
| <b>Pilra</b>         | 370 | 0.077109165 | Yes |
| <b>Il10ra</b>        | 375 | 0.07809941  | Yes |
| <b>Ikzf1</b>         | 387 | 0.07865941  | Yes |
| <b>Fxd5</b>          | 396 | 0.0794038   | Yes |
| <b>Gpr183</b>        | 409 | 0.07990234  | Yes |
| <b>Sec1414</b>       | 412 | 0.08101551  | Yes |
| <b>Tmem26</b>        | 447 | 0.08016187  | Yes |
| <b>Col1a2</b>        | 460 | 0.08066041  | Yes |
| <b>Ncf2</b>          | 468 | 0.081466265 | Yes |
| <b>Uba7</b>          | 483 | 0.08184188  | Yes |
| <b>C3</b>            | 490 | 0.08270919  | Yes |
| <b>Csf2rb</b>        | 494 | 0.0837609   | Yes |
| <b>Lgals3</b>        | 511 | 0.08401359  | Yes |
| <b>Ebi3</b>          | 521 | 0.08469652  | Yes |
| <b>Myo1g</b>         | 523 | 0.085871145 | Yes |
| <b>Hmx3</b>          | 546 | 0.08575506  | Yes |
| <b>Bmf</b>           | 577 | 0.08514727  | Yes |
| <b>Tnfrsf1b</b>      | 589 | 0.08570727  | Yes |
| <b>5430427O19Rik</b> | 592 | 0.08682044  | Yes |
| <b>Vsig4</b>         | 609 | 0.08707313  | Yes |
| <b>Rgs18</b>         | 617 | 0.08787899  | Yes |
| <b>Csf1r</b>         | 635 | 0.088070214 | Yes |
| <b>Bin2</b>          | 681 | 0.086540475 | Yes |
| <b>Ccl5</b>          | 704 | 0.08642439  | Yes |
| <b>Irf6</b>          | 706 | 0.087599024 | Yes |
| <b>Lsr</b>           | 710 | 0.088650726 | Yes |
| <b>Rhbdf2</b>        | 719 | 0.08939512  | Yes |
| <b>Itgb2</b>         | 726 | 0.090262435 | Yes |
| <b>Adap2</b>         | 735 | 0.09100682  | Yes |
| <b>Epsti1</b>        | 742 | 0.091874145 | Yes |
| <b>Cd86</b>          | 762 | 0.091942444 | Yes |
| <b>Nxn1</b>          | 764 | 0.09311707  | Yes |
| <b>Slc15a3</b>       | 769 | 0.094107315 | Yes |
| <b>Ncf1</b>          | 791 | 0.094052695 | Yes |
| <b>Lrrc18</b>        | 798 | 0.09492001  | Yes |
| <b>Arhgap30</b>      | 822 | 0.09474246  | Yes |
| <b>Plbd1</b>         | 872 | 0.09296688  | Yes |

|                 |      |             |     |
|-----------------|------|-------------|-----|
| <b>Klhl6</b>    | 894  | 0.09291225  | Yes |
| <b>Lmod2</b>    | 905  | 0.09353372  | Yes |
| <b>Arl11</b>    | 919  | 0.09397079  | Yes |
| <b>Rasal3</b>   | 948  | 0.09348593  | Yes |
| <b>Cdc60</b>    | 958  | 0.09416886  | Yes |
| <b>Itgal</b>    | 959  | 0.09540495  | Yes |
| <b>Mrph</b>     | 991  | 0.0947357   | Yes |
| <b>Fndc7</b>    | 992  | 0.09597179  | Yes |
| <b>Milr1</b>    | 1005 | 0.09647033  | Yes |
| <b>Sash3</b>    | 1025 | 0.09653863  | Yes |
| <b>Gfap</b>     | 1038 | 0.097037174 | Yes |
| <b>Serping1</b> | 1059 | 0.097044006 | Yes |
| <b>Slamf8</b>   | 1094 | 0.09619037  | Yes |
| <b>Ifi44l</b>   | 1096 | 0.097365    | Yes |
| <b>Rhoh</b>     | 1097 | 0.098601095 | Yes |
| <b>Batf</b>     | 1100 | 0.09971426  | Yes |
| <b>Mfsd7a</b>   | 1103 | 0.100827426 | Yes |
| <b>Ifi44</b>    | 1143 | 0.099666476 | Yes |
| <b>Ptpn6</b>    | 1155 | 0.10022648  | Yes |
| <b>AU021092</b> | 1160 | 0.10121672  | Yes |
| <b>Il2rg</b>    | 1179 | 0.101346485 | Yes |
| <b>Fam46c</b>   | 1181 | 0.102521114 | Yes |
| <b>Gapt</b>     | 1187 | 0.103449896 | Yes |
| <b>S100a3</b>   | 1234 | 0.1018587   | Yes |
| <b>Sh2d2a</b>   | 1303 | 0.098915316 | Yes |
| <b>Il13ra1</b>  | 1307 | 0.099967025 | Yes |
| <b>Klrkl</b>    | 1354 | 0.09837583  | Yes |
| <b>Col1a1</b>   | 1366 | 0.098935835 | Yes |
| <b>Itgb7</b>    | 1395 | 0.098450966 | Yes |
| <b>Igfbp7</b>   | 1398 | 0.099564135 | Yes |
| <b>Il21r</b>    | 1417 | 0.0996939   | Yes |
| <b>Cyp19a1</b>  | 1428 | 0.10031536  | Yes |
| <b>Tmem236</b>  | 1434 | 0.101244144 | Yes |
| <b>Pycard</b>   | 1442 | 0.10205     | Yes |
| <b>Hmx2</b>     | 1466 | 0.10187245  | Yes |
| <b>Cd300c</b>   | 1478 | 0.10243245  | Yes |
| <b>Ciita</b>    | 1507 | 0.10194758  | Yes |
| <b>Rnase6</b>   | 1517 | 0.10263052  | Yes |
| <b>Klhl41</b>   | 1534 | 0.102883205 | Yes |
| <b>Osm</b>      | 1553 | 0.103012964 | Yes |
| <b>Tgfb1</b>    | 1560 | 0.103880286 | Yes |
| <b>Cmklr1</b>   | 1562 | 0.105054915 | Yes |
| <b>Emp3</b>     | 1583 | 0.105061755 | Yes |
| <b>Cd300a</b>   | 1589 | 0.10599053  | Yes |
| <b>Plek</b>     | 1638 | 0.10427641  | Yes |
| <b>Elf4</b>     | 1658 | 0.10434471  | Yes |
| <b>Scimp</b>    | 1679 | 0.10435155  | Yes |
| <b>Cxcl12</b>   | 1738 | 0.1020228   | Yes |
| <b>Hoxb7</b>    | 1786 | 0.10037014  | Yes |
| <b>Pgam2</b>    | 1801 | 0.10074576  | Yes |
| <b>Mettl21b</b> | 1851 | 0.098970175 | Yes |
| <b>Ston1</b>    | 1875 | 0.09879262  | Yes |
| <b>Arhgef5</b>  | 1884 | 0.099537015 | Yes |
| <b>Lair1</b>    | 1910 | 0.09923653  | Yes |
| <b>Arhgap15</b> | 1924 | 0.099673614 | Yes |
| <b>Loxl1</b>    | 1948 | 0.09949607  | Yes |
| <b>Ggt1</b>     | 1960 | 0.10005607  | Yes |
| <b>Frzb</b>     | 1965 | 0.10104631  | Yes |
| <b>S100a4</b>   | 1995 | 0.10049998  | Yes |
| <b>Cyth4</b>    | 1998 | 0.10161315  | Yes |

|                 |      |             |     |
|-----------------|------|-------------|-----|
| <b>Frrs1</b>    | 2051 | 0.09965318  | Yes |
| <b>Trim5</b>    | 2057 | 0.10058196  | Yes |
| <b>Cxcl16</b>   | 2078 | 0.10058879  | Yes |
| <b>Vwa3b</b>    | 2090 | 0.1011488   | Yes |
| <b>Steap3</b>   | 2101 | 0.10177026  | Yes |
| <b>Till3</b>    | 2111 | 0.102453195 | Yes |
| <b>Fah</b>      | 2113 | 0.10362782  | Yes |
| <b>Rtp4</b>     | 2115 | 0.10480245  | Yes |
| <b>Cxcr6</b>    | 2117 | 0.10597709  | Yes |
| <b>Apol6</b>    | 2124 | 0.1068444   | Yes |
| <b>Ctgf</b>     | 2152 | 0.106421    | Yes |
| <b>Tlr1</b>     | 2163 | 0.10704247  | Yes |
| <b>Ikbke</b>    | 2215 | 0.10514396  | Yes |
| <b>Lmod1</b>    | 2222 | 0.10601127  | Yes |
| <b>Fam129b</b>  | 2228 | 0.10694005  | Yes |
| <b>Cd68</b>     | 2258 | 0.106393725 | Yes |
| <b>Gpsm3</b>    | 2259 | 0.10762982  | Yes |
| <b>Cyp39a1</b>  | 2273 | 0.108066894 | Yes |
| <b>Irx1</b>     | 2307 | 0.10727472  | Yes |
| <b>Galnt12</b>  | 2320 | 0.10777326  | Yes |
| <b>Fcgbp</b>    | 2322 | 0.10894789  | Yes |
| <b>Dock8</b>    | 2341 | 0.109077655 | Yes |
| <b>Lgals9</b>   | 2342 | 0.11031374  | Yes |
| <b>Dram1</b>    | 2390 | 0.108661085 | Yes |
| <b>Rell1</b>    | 2410 | 0.108729385 | Yes |
| <b>Eln</b>      | 2430 | 0.10879769  | Yes |
| <b>Tlr2</b>     | 2437 | 0.10966501  | Yes |
| <b>Helz2</b>    | 2481 | 0.108258195 | Yes |
| <b>Fam114a1</b> | 2544 | 0.105683595 | Yes |
| <b>Slc7a7</b>   | 2553 | 0.10642799  | Yes |
| <b>Sh3tc1</b>   | 2557 | 0.10747969  | Yes |
| <b>Unc13d</b>   | 2577 | 0.107548    | Yes |
| <b>Uap111</b>   | 2578 | 0.10878409  | Yes |
| <b>Parp14</b>   | 2613 | 0.107930444 | Yes |
| <b>Snx20</b>    | 2681 | 0.10504853  | Yes |
| <b>Myo1c</b>    | 2696 | 0.10542414  | Yes |
| <b>Rgs9</b>     | 2706 | 0.10610708  | Yes |
| <b>Cela1</b>    | 2780 | 0.10285638  | Yes |
| <b>Irf9</b>     | 2787 | 0.1037237   | Yes |
| <b>Syt11</b>    | 2816 | 0.103238836 | Yes |
| <b>B4galt1</b>  | 2868 | 0.10134032  | Yes |
| <b>P4ha2</b>    | 2885 | 0.10159302  | Yes |
| <b>Tgfb1</b>    | 2889 | 0.10264472  | Yes |
| <b>Socs1</b>    | 2892 | 0.10375789  | Yes |
| <b>Card6</b>    | 2899 | 0.1046252   | Yes |
| <b>Def6</b>     | 2919 | 0.10469351  | Yes |
| <b>Psmb8</b>    | 2930 | 0.10531497  | Yes |
| <b>Vamp8</b>    | 2935 | 0.10630521  | Yes |
| <b>Clu</b>      | 2945 | 0.10698815  | Yes |
| <b>Ifi30</b>    | 2956 | 0.10760961  | Yes |
| <b>Lat2</b>     | 2996 | 0.10644865  | Yes |
| <b>Arhgap6</b>  | 3018 | 0.10639403  | Yes |
| <b>Cubn</b>     | 3028 | 0.10707696  | Yes |
| <b>Sparc</b>    | 3042 | 0.10751403  | Yes |
| <b>Sypl2</b>    | 3055 | 0.10801257  | Yes |
| <b>Tlr5</b>     | 3073 | 0.1082038   | Yes |
| <b>Mvp</b>      | 3078 | 0.10919404  | Yes |
| <b>Ifi35</b>    | 3102 | 0.10901649  | Yes |
| <b>Zbtb20</b>   | 3132 | 0.108470164 | Yes |
| <b>Tram2</b>    | 3141 | 0.10921456  | Yes |

|                 |      |             |     |
|-----------------|------|-------------|-----|
| <b>Timp2</b>    | 3149 | 0.11002041  | Yes |
| <b>Aebp1</b>    | 3167 | 0.11021163  | Yes |
| <b>Il4ra</b>    | 3174 | 0.111078955 | Yes |
| <b>Btk</b>      | 3178 | 0.11213066  | Yes |
| <b>Hoga1</b>    | 3182 | 0.113182366 | Yes |
| <b>Tlcd2</b>    | 3216 | 0.11239018  | Yes |
| <b>Rbm47</b>    | 3232 | 0.11270434  | Yes |
| <b>Nupr1</b>    | 3249 | 0.11295702  | Yes |
| <b>Ripk3</b>    | 3260 | 0.11357849  | Yes |
| <b>Nlrc5</b>    | 3263 | 0.11469166  | Yes |
| <b>Ly96</b>     | 3281 | 0.11488289  | Yes |
| <b>S100a16</b>  | 3285 | 0.11593459  | Yes |
| <b>Parp10</b>   | 3340 | 0.113851696 | Yes |
| <b>Prss23</b>   | 3347 | 0.11471901  | Yes |
| <b>Slc11a1</b>  | 3364 | 0.1149717   | Yes |
| <b>Srpx</b>     | 3403 | 0.11387221  | Yes |
| <b>Pabpc11</b>  | 3408 | 0.11486245  | Yes |
| <b>Rbpms</b>    | 3429 | 0.11486929  | Yes |
| <b>Tmem106a</b> | 3432 | 0.11598246  | Yes |
| <b>Lrrc46</b>   | 3459 | 0.115620516 | Yes |
| <b>Hlx</b>      | 3475 | 0.11593467  | Yes |
| <b>Slc38a6</b>  | 3478 | 0.11704784  | Yes |
| <b>Rab32</b>    | 3487 | 0.11779223  | Yes |
| <b>Ddit3</b>    | 3488 | 0.11902832  | Yes |
| <b>Rab31l1</b>  | 3490 | 0.12020295  | Yes |
| <b>Dock11</b>   | 3511 | 0.12020979  | Yes |
| <b>Rin3</b>     | 3517 | 0.12113857  | Yes |
| <b>Rarg</b>     | 3525 | 0.12194443  | Yes |
| <b>Gpx7</b>     | 3534 | 0.122688815 | Yes |
| <b>Emp1</b>     | 3545 | 0.12331028  | Yes |
| <b>Slc8b1</b>   | 3553 | 0.12411614  | Yes |
| <b>Gbp2</b>     | 3567 | 0.12455321  | Yes |
| <b>Iqgap1</b>   | 3569 | 0.12572785  | Yes |
| <b>Tmem176a</b> | 3623 | 0.12370641  | Yes |
| <b>AA467197</b> | 3630 | 0.12457372  | Yes |
| <b>Hebp1</b>    | 3640 | 0.12525666  | Yes |
| <b>Abca1</b>    | 3646 | 0.12618543  | Yes |
| <b>Lmna</b>     | 3668 | 0.1261308   | Yes |
| <b>Ifi27</b>    | 3674 | 0.1270596   | Yes |
| <b>Fam109b</b>  | 3690 | 0.12737374  | Yes |
| <b>Il1r1</b>    | 3699 | 0.12811813  | Yes |
| <b>Cyp27a1</b>  | 3705 | 0.12904692  | Yes |
| <b>Hebp2</b>    | 3718 | 0.12954545  | Yes |
| <b>C2</b>       | 3725 | 0.13041277  | Yes |
| <b>Tmem176b</b> | 3738 | 0.1309113   | Yes |
| <b>Ip6k3</b>    | 3754 | 0.13122547  | Yes |
| <b>Rhoc</b>     | 3756 | 0.1324001   | Yes |
| <b>Bcat2</b>    | 3760 | 0.1334518   | Yes |
| <b>Mmp14</b>    | 3766 | 0.13438058  | Yes |
| <b>Fcgrt</b>    | 3774 | 0.13518643  | Yes |
| <b>Hist1h4j</b> | 3786 | 0.13574643  | Yes |
| <b>Rnd2</b>     | 3829 | 0.13440108  | Yes |
| <b>Sptlc3</b>   | 3839 | 0.13508402  | Yes |
| <b>Marveld3</b> | 3910 | 0.13201772  | Yes |
| <b>My19</b>     | 3912 | 0.13319235  | Yes |
| <b>Zc3h12a</b>  | 3939 | 0.13283041  | Yes |
| <b>Tax1bp3</b>  | 3942 | 0.13394357  | Yes |
| <b>Ppfibp2</b>  | 3966 | 0.13376603  | Yes |
| <b>Apoe</b>     | 3971 | 0.13475627  | Yes |
| <b>B2m</b>      | 3993 | 0.13470164  | Yes |

|                 |      |            |     |
|-----------------|------|------------|-----|
| <b>Unc93b1</b>  | 4014 | 0.13470848 | Yes |
| <b>Dtx3l</b>    | 4079 | 0.13201095 | Yes |
| <b>Egf</b>      | 4082 | 0.13312413 | Yes |
| <b>Arpc1b</b>   | 4092 | 0.13380705 | Yes |
| <b>Parp9</b>    | 4094 | 0.13498168 | Yes |
| <b>Ager</b>     | 4098 | 0.13603339 | Yes |
| <b>Lcat</b>     | 4118 | 0.1361017  | Yes |
| <b>Ifit2</b>    | 4120 | 0.13727632 | Yes |
| <b>Myof</b>     | 4177 | 0.13507049 | Yes |
| <b>Man2b1</b>   | 4199 | 0.13501588 | Yes |
| <b>Icam1</b>    | 4202 | 0.13612904 | Yes |
| <b>Atp6v0e</b>  | 4218 | 0.13644318 | Yes |
| <b>Lca5l</b>    | 4259 | 0.13522077 | Yes |
| <b>Bmp7</b>     | 4284 | 0.13498175 | Yes |
| <b>Abhd14b</b>  | 4288 | 0.13603346 | Yes |
| <b>Pdlim1</b>   | 4289 | 0.13726956 | Yes |
| <b>Adamts12</b> | 4293 | 0.13832127 | Yes |
| <b>Eno3</b>     | 4312 | 0.13845102 | Yes |
| <b>Casp8</b>    | 4316 | 0.13950273 | Yes |
| <b>Plekho2</b>  | 4331 | 0.13987835 | Yes |
| <b>Dab2</b>     | 4364 | 0.13914762 | Yes |
| <b>Naga</b>     | 4372 | 0.13995348 | Yes |
| <b>Ramp2</b>    | 4416 | 0.13854668 | Yes |
| <b>Ltbp3</b>    | 4428 | 0.13910668 | Yes |
| <b>Csf2ra</b>   | 4433 | 0.14009692 | Yes |
| <b>Grn</b>      | 4450 | 0.14034961 | Yes |
| <b>Podn</b>     | 4476 | 0.14004913 | Yes |
| <b>Gab3</b>     | 4496 | 0.14011744 | Yes |
| <b>Mfsd7c</b>   | 4519 | 0.14000134 | Yes |
| <b>Psd4</b>     | 4542 | 0.13988526 | Yes |
| <b>Pxdc1</b>    | 4563 | 0.1398921  | Yes |
| <b>Smardc2</b>  | 4573 | 0.14057502 | Yes |
| <b>Scamp2</b>   | 4590 | 0.14082772 | Yes |
| <b>Loxl3</b>    | 4607 | 0.14108041 | Yes |
| <b>Fbxo32</b>   | 4646 | 0.13998091 | Yes |
| <b>Lrrc8e</b>   | 4698 | 0.1380824  | Yes |
| <b>Il4i1</b>    | 4701 | 0.13919556 | Yes |
| <b>Elf1</b>     | 4753 | 0.13729706 | Yes |
| <b>Gsn</b>      | 4757 | 0.13834876 | Yes |
| <b>Ap1s2</b>    | 4786 | 0.1378639  | Yes |
| <b>Eps8</b>     | 4802 | 0.13817805 | Yes |
| <b>Timp1</b>    | 4803 | 0.13941415 | Yes |
| <b>Plau</b>     | 4813 | 0.14009707 | Yes |
| <b>P2ry2</b>    | 4837 | 0.13991952 | Yes |
| <b>Pik3r5</b>   | 4862 | 0.1396805  | Yes |
| <b>Syne2</b>    | 4917 | 0.1375976  | Yes |
| <b>Flna</b>     | 4921 | 0.13864931 | Yes |
| <b>Acrbp</b>    | 4928 | 0.13951664 | Yes |
| <b>Id3</b>      | 4966 | 0.1384786  | Yes |
| <b>Ctf1</b>     | 4979 | 0.13897714 | Yes |
| <b>Antxr1</b>   | 4996 | 0.13922983 | Yes |
| <b>Trim56</b>   | 4997 | 0.14046593 | Yes |
| <b>Lats2</b>    | 5008 | 0.1410874  | Yes |
| <b>Tep1</b>     | 5016 | 0.14189325 | Yes |
| <b>Sorbs3</b>   | 5022 | 0.14282203 | Yes |
| <b>Pstpip2</b>  | 5039 | 0.14307472 | Yes |
| <b>Tanc1</b>    | 5051 | 0.14363472 | Yes |
| <b>Runx1</b>    | 5058 | 0.14450203 | Yes |
| <b>Ctdsp1</b>   | 5061 | 0.1456152  | Yes |
| <b>Mrc2</b>     | 5070 | 0.1463596  | Yes |

|                |      |            |     |
|----------------|------|------------|-----|
| <b>Nrp2</b>    | 5102 | 0.14569034 | Yes |
| <b>Dok1</b>    | 5106 | 0.14674205 | Yes |
| <b>Rasef</b>   | 5108 | 0.14791667 | Yes |
| <b>Tbc1d2b</b> | 5131 | 0.1478006  | Yes |
| <b>Anxa2</b>   | 5201 | 0.14479575 | Yes |
| <b>Sqstm1</b>  | 5234 | 0.14406504 | Yes |
| <b>Ctns</b>    | 5240 | 0.14499381 | Yes |
| <b>Plekha7</b> | 5245 | 0.14598405 | Yes |
| <b>Nmb</b>     | 5263 | 0.14617528 | Yes |
| <b>Accs</b>    | 5274 | 0.14679675 | Yes |
| <b>Glis3</b>   | 5284 | 0.14747968 | Yes |
| <b>Lima1</b>   | 5287 | 0.14859284 | Yes |
| <b>Cebpd</b>   | 5293 | 0.14952162 | Yes |
| <b>Mfng</b>    | 5300 | 0.15038894 | Yes |
| <b>Fam46a</b>  | 5327 | 0.150027   | Yes |
| <b>Lrig3</b>   | 5333 | 0.15095578 | Yes |
| <b>Slc35d2</b> | 5351 | 0.15114701 | Yes |
| <b>Aifm2</b>   | 5353 | 0.15232164 | Yes |
| <b>Arhgap4</b> | 5363 | 0.15300457 | Yes |
| <b>Msh5</b>    | 5380 | 0.15325725 | Yes |
| <b>Spsb2</b>   | 5383 | 0.15437043 | Yes |
| <b>Hk2</b>     | 5410 | 0.1540085  | Yes |
| <b>B3gnt5</b>  | 5425 | 0.1543841  | Yes |
| <b>Echdc2</b>  | 5438 | 0.15488264 | Yes |
| <b>Antxr2</b>  | 5456 | 0.15507387 | Yes |
| <b>Tmprss5</b> | 5463 | 0.15594119 | Yes |
| <b>Mocos</b>   | 5477 | 0.15637825 | Yes |
| <b>Psemb9</b>  | 5479 | 0.1575529  | Yes |
| <b>Rras</b>    | 5490 | 0.15817435 | Yes |
| <b>Txnip</b>   | 5498 | 0.1589802  | Yes |
| <b>Gpr141</b>  | 5500 | 0.16015485 | Yes |
| <b>Dpyd</b>    | 5530 | 0.15960851 | Yes |
| <b>Samd9l</b>  | 5559 | 0.15912364 | Yes |
| <b>Serinc5</b> | 5566 | 0.15999097 | Yes |
| <b>Ascc2</b>   | 5573 | 0.16085829 | Yes |
| <b>Tctn1</b>   | 5579 | 0.16178706 | Yes |
| <b>Cfap53</b>  | 5600 | 0.1617939  | Yes |
| <b>Fam20a</b>  | 5629 | 0.16130903 | Yes |
| <b>Efna1</b>   | 5667 | 0.160271   | Yes |
| <b>Sgsh</b>    | 5677 | 0.16095394 | Yes |
| <b>Pxn</b>     | 5680 | 0.1620671  | Yes |
| <b>Cd163</b>   | 5728 | 0.16041444 | Yes |
| <b>Gsdmd</b>   | 5730 | 0.16158907 | Yes |
| <b>Sdsl</b>    | 5741 | 0.16221054 | Yes |
| <b>Plp2</b>    | 5748 | 0.16307786 | Yes |
| <b>Shc1</b>    | 5762 | 0.16351494 | Yes |
| <b>Hexa</b>    | 5768 | 0.16444372 | Yes |
| <b>Plxdc2</b>  | 5775 | 0.16531104 | Yes |
| <b>Plvap</b>   | 5797 | 0.16525641 | Yes |
| <b>Ptpn7</b>   | 5818 | 0.16526325 | Yes |
| <b>Serinc2</b> | 5819 | 0.16649935 | Yes |
| <b>Ankub1</b>  | 5834 | 0.16687496 | Yes |
| <b>Lrp10</b>   | 5850 | 0.1671891  | Yes |
| <b>Lbx2</b>    | 5863 | 0.16768764 | Yes |
| <b>Gdf15</b>   | 5867 | 0.16873935 | Yes |
| <b>Parp12</b>  | 5895 | 0.16831595 | Yes |
| <b>Creb3l2</b> | 5906 | 0.16893741 | Yes |
| <b>Pfkfb2</b>  | 5942 | 0.1680223  | Yes |
| <b>Fyco1</b>   | 5966 | 0.16784476 | Yes |
| <b>Sfxn2</b>   | 5981 | 0.16822037 | Yes |

|                 |      |            |     |
|-----------------|------|------------|-----|
| <b>Bace2</b>    | 5998 | 0.16847306 | Yes |
| <b>Cd44</b>     | 6012 | 0.16891015 | Yes |
| <b>Kctd11</b>   | 6018 | 0.16983892 | Yes |
| <b>Ddit4</b>    | 6028 | 0.17052186 | Yes |
| <b>Vangl1</b>   | 6047 | 0.17065161 | Yes |
| <b>Hps5</b>     | 6061 | 0.1710887  | Yes |
| <b>Galnt10</b>  | 6070 | 0.17183308 | Yes |
| <b>Anxa4</b>    | 6113 | 0.17048773 | Yes |
| <b>Sat1</b>     | 6119 | 0.17141652 | Yes |
| <b>Slc12a4</b>  | 6139 | 0.17148481 | Yes |
| <b>Pla2g16</b>  | 6170 | 0.17087702 | Yes |
| <b>Morc4</b>    | 6181 | 0.17149849 | Yes |
| <b>Mvb12a</b>   | 6191 | 0.17218143 | Yes |
| <b>Abcd1</b>    | 6199 | 0.17298728 | Yes |
| <b>Npc2</b>     | 6218 | 0.17311704 | Yes |
| <b>Anxa5</b>    | 6248 | 0.1725707  | Yes |
| <b>Slc4a2</b>   | 6269 | 0.17257755 | Yes |
| <b>Osmr</b>     | 6299 | 0.17203122 | Yes |
| <b>Vcam1</b>    | 6327 | 0.17160782 | Yes |
| <b>Bdh2</b>     | 6347 | 0.17167611 | Yes |
| <b>Nuak2</b>    | 6358 | 0.17229758 | Yes |
| <b>Cda</b>      | 6364 | 0.17322637 | Yes |
| <b>Tcirg1</b>   | 6373 | 0.17397076 | Yes |
| <b>Tmbim1</b>   | 6409 | 0.17305565 | Yes |
| <b>Slc16a4</b>  | 6424 | 0.17343126 | Yes |
| <b>Mov10</b>    | 6467 | 0.17208593 | Yes |
| <b>Plcd1</b>    | 6481 | 0.17252299 | Yes |
| <b>Adamtsl4</b> | 6487 | 0.17345178 | Yes |
| <b>Kank2</b>    | 6543 | 0.17130741 | Yes |
| <b>Igfbp5</b>   | 6602 | 0.16897868 | Yes |
| <b>Angpt1</b>   | 6618 | 0.16929282 | Yes |
| <b>Mbd6</b>     | 6686 | 0.16641091 | Yes |
| <b>Metrn</b>    | 6700 | 0.16684799 | Yes |
| <b>Stat5a</b>   | 6706 | 0.16777676 | Yes |
| <b>Nod1</b>     | 6711 | 0.168767   | Yes |
| <b>Ppp1r18</b>  | 6717 | 0.16969578 | Yes |
| <b>Hist1h1c</b> | 6769 | 0.16779728 | Yes |
| <b>Pedh18</b>   | 6779 | 0.1684802  | Yes |
| <b>Svil</b>     | 6786 | 0.16934752 | Yes |
| <b>Pxdn</b>     | 6807 | 0.16935436 | Yes |
| <b>Bst2</b>     | 6906 | 0.1645671  | Yes |
| <b>Ltbr</b>     | 6914 | 0.16537295 | Yes |
| <b>Tspan4</b>   | 6919 | 0.1663632  | Yes |
| <b>Troap</b>    | 6931 | 0.1669232  | Yes |
| <b>Muc1</b>     | 6933 | 0.16809782 | Yes |
| <b>Fkbp10</b>   | 6953 | 0.16816613 | Yes |
| <b>Nfkbia</b>   | 6954 | 0.16940223 | Yes |
| <b>Vamp5</b>    | 6962 | 0.17020808 | Yes |
| <b>Cryab</b>    | 6966 | 0.17125978 | Yes |
| <b>Myd88</b>    | 6971 | 0.17225002 | Yes |
| <b>Zbtb42</b>   | 6973 | 0.17342466 | Yes |
| <b>Sdcbp</b>    | 6990 | 0.17367734 | Yes |
| <b>Kdelc2</b>   | 7012 | 0.17362271 | Yes |
| <b>Vat1</b>     | 7027 | 0.17399834 | Yes |
| <b>Mybl2</b>    | 7036 | 0.17474273 | Yes |
| <b>Mr1</b>      | 7051 | 0.17511834 | Yes |
| <b>Zfp3612</b>  | 7060 | 0.17586273 | Yes |
| <b>Trp53</b>    | 7093 | 0.17513202 | Yes |
| <b>Naglu</b>    | 7128 | 0.17427838 | Yes |
| <b>Pdia4</b>    | 7141 | 0.17477691 | Yes |



|                  |      |            |     |
|------------------|------|------------|-----|
| <b>Plekha4</b>   | 7152 | 0.17539838 | Yes |
| <b>Casp6</b>     | 7172 | 0.17546669 | Yes |
| <b>C1qtnf6</b>   | 7188 | 0.17578083 | Yes |
| <b>Arrdc4</b>    | 7194 | 0.1767096  | Yes |
| <b>Hspb2</b>     | 7216 | 0.17665498 | Yes |
| <b>Lamb2</b>     | 7225 | 0.17739938 | Yes |
| <b>Plin2</b>     | 7232 | 0.17826669 | Yes |
| <b>Hcst</b>      | 7256 | 0.17808914 | No  |
| <b>Asah1</b>     | 7337 | 0.17440821 | No  |
| <b>Rab34</b>     | 7410 | 0.17121899 | No  |
| <b>Slc16a13</b>  | 7471 | 0.1687673  | No  |
| <b>Rest</b>      | 7510 | 0.16766782 | No  |
| <b>Nek9</b>      | 7512 | 0.16884245 | No  |
| <b>Efna4</b>     | 7533 | 0.16884929 | No  |
| <b>Rab27a</b>    | 7615 | 0.1651069  | No  |
| <b>Tspan6</b>    | 7621 | 0.16603567 | No  |
| <b>Cd14</b>      | 7625 | 0.16708738 | No  |
| <b>Olfml2b</b>   | 7693 | 0.16420546 | No  |
| <b>Bard1</b>     | 7718 | 0.16396645 | No  |
| <b>Rab13</b>     | 7750 | 0.16329719 | No  |
| <b>H2-DMa</b>    | 7760 | 0.16398013 | No  |
| <b>Cpq</b>       | 7765 | 0.16497037 | No  |
| <b>Hist1h2ae</b> | 7767 | 0.166145   | No  |
| <b>Ppp1r3b</b>   | 7770 | 0.16725816 | No  |
| <b>Serpinh1</b>  | 7776 | 0.16818695 | No  |
| <b>Catip</b>     | 7819 | 0.1668416  | No  |
| <b>Cd63</b>      | 7826 | 0.16770892 | No  |
| <b>Itgb5</b>     | 7827 | 0.16894501 | No  |
| <b>Hjurp</b>     | 7833 | 0.16987379 | No  |
| <b>Capn2</b>     | 7896 | 0.1672992  | No  |
| <b>Mboat1</b>    | 7906 | 0.16798212 | No  |
| <b>Nmi</b>       | 7921 | 0.16835773 | No  |
| <b>Plod2</b>     | 7978 | 0.16615191 | No  |
| <b>Tpp1</b>      | 8017 | 0.16505241 | No  |
| <b>Slc4a11</b>   | 8027 | 0.16573535 | No  |
| <b>GlmP</b>      | 8065 | 0.16469732 | No  |
| <b>Snord104</b>  | 8111 | 0.16316758 | No  |
| <b>Zc3hav1</b>   | 8165 | 0.16114615 | No  |
| <b>Has3</b>      | 8172 | 0.16201347 | No  |
| <b>Ptbp1</b>     | 8175 | 0.16312663 | No  |
| <b>Pik3ip1</b>   | 8217 | 0.16184275 | No  |
| <b>Chst3</b>     | 8250 | 0.16111204 | No  |
| <b>Hmg20b</b>    | 8268 | 0.16130327 | No  |
| <b>Rab29</b>     | 8283 | 0.16167888 | No  |
| <b>Il33</b>      | 8363 | 0.1580594  | No  |
| <b>Tagln2</b>    | 8371 | 0.15886526 | No  |
| <b>Stk36</b>     | 8387 | 0.15917942 | No  |
| <b>Orai1</b>     | 8404 | 0.1594321  | No  |
| <b>Reep4</b>     | 8463 | 0.15710336 | No  |
| <b>Haus4</b>     | 8494 | 0.15649556 | No  |
| <b>Ddr2</b>      | 8520 | 0.15619509 | No  |
| <b>Mcm5</b>      | 8549 | 0.15571022 | No  |
| <b>Tmem37</b>    | 8551 | 0.15688485 | No  |
| <b>Cald1</b>     | 8557 | 0.15781364 | No  |
| <b>Tnfrsf1a</b>  | 8596 | 0.15671414 | No  |
| <b>Popdc2</b>    | 8666 | 0.15370929 | No  |
| <b>Lipg</b>      | 8687 | 0.15371613 | No  |
| <b>Sumf1</b>     | 8694 | 0.15458345 | No  |
| <b>Prosl</b>     | 8726 | 0.1539142  | No  |
| <b>Igf2bp3</b>   | 8741 | 0.15428981 | No  |

|                      |       |             |    |
|----------------------|-------|-------------|----|
| <b>G0s2</b>          | 8742  | 0.15552591  | No |
| <b>Ctsd</b>          | 8758  | 0.15584005  | No |
| <b>Zdhhc12</b>       | 8781  | 0.15572397  | No |
| <b>Map4k1</b>        | 8804  | 0.15560788  | No |
| <b>Cnpy4</b>         | 8814  | 0.15629081  | No |
| <b>Tlr6</b>          | 8822  | 0.15709667  | No |
| <b>Edem2</b>         | 8827  | 0.15808691  | No |
| <b>Celsr1</b>        | 8854  | 0.15772498  | No |
| <b>Gusb</b>          | 8857  | 0.15883814  | No |
| <b>Mt2</b>           | 8861  | 0.15988985  | No |
| <b>Ece1</b>          | 8915  | 0.15786842  | No |
| <b>Xkr8</b>          | 8926  | 0.15848987  | No |
| <b>Tcn2</b>          | 8990  | 0.15585381  | No |
| <b>Mxd3</b>          | 9082  | 0.15149678  | No |
| <b>Tiparp</b>        | 9123  | 0.15027437  | No |
| <b>Ninj1</b>         | 9203  | 0.1466549   | No |
| <b>Rgs10</b>         | 9258  | 0.144572    | No |
| <b>Sil1</b>          | 9259  | 0.1458081   | No |
| <b>Clic1</b>         | 9335  | 0.14243448  | No |
| <b>Ajuba</b>         | 9358  | 0.1423184   | No |
| <b>Slc2a10</b>       | 9359  | 0.14355448  | No |
| <b>Melk</b>          | 9415  | 0.14141013  | No |
| <b>Eps811</b>        | 9425  | 0.14209305  | No |
| <b>Sfrp4</b>         | 9538  | 0.13644531  | No |
| <b>4932438H23Rik</b> | 9560  | 0.13639069  | No |
| <b>Pltp</b>          | 9570  | 0.13707362  | No |
| <b>Cdk4</b>          | 9588  | 0.13726485  | No |
| <b>Thns12</b>        | 9638  | 0.13548926  | No |
| <b>Tex9</b>          | 9654  | 0.13580342  | No |
| <b>Scpep1</b>        | 9720  | 0.13304442  | No |
| <b>Echdc3</b>        | 9734  | 0.1334815   | No |
| <b>Cnn3</b>          | 9808  | 0.1302308   | No |
| <b>Plekhh3</b>       | 9828  | 0.1302991   | No |
| <b>Smc4</b>          | 9843  | 0.13067472  | No |
| <b>Nedd4</b>         | 9850  | 0.13154204  | No |
| <b>Rrad</b>          | 9852  | 0.13271667  | No |
| <b>Alpk1</b>         | 9922  | 0.12971182  | No |
| <b>Arhgap17</b>      | 9952  | 0.1291655   | No |
| <b>Tmem39a</b>       | 9959  | 0.13003282  | No |
| <b>Bax</b>           | 9960  | 0.13126892  | No |
| <b>Cers2</b>         | 10011 | 0.12943186  | No |
| <b>Mmp19</b>         | 10161 | 0.12151     | No |
| <b>Copz2</b>         | 10177 | 0.12182415  | No |
| <b>Eif4ebp3</b>      | 10185 | 0.12263001  | No |
| <b>Hfe</b>           | 10197 | 0.12319001  | No |
| <b>Fam111a</b>       | 10248 | 0.12135296  | No |
| <b>Mapkapk2</b>      | 10259 | 0.12197443  | No |
| <b>Nsun7</b>         | 10264 | 0.12296467  | No |
| <b>Tgif1</b>         | 10409 | 0.11535012  | No |
| <b>Fam83g</b>        | 10425 | 0.11566427  | No |
| <b>Cpne3</b>         | 10452 | 0.11530233  | No |
| <b>Arhgef1</b>       | 10493 | 0.114079915 | No |
| <b>Slc1a5</b>        | 10506 | 0.114578456 | No |
| <b>Tead3</b>         | 10522 | 0.1148926   | No |
| <b>Cmtm3</b>         | 10535 | 0.11539114  | No |
| <b>Sspn</b>          | 10565 | 0.114844814 | No |
| <b>Wsb1</b>          | 10612 | 0.11325362  | No |
| <b>Trip10</b>        | 10660 | 0.111600965 | No |
| <b>Tap1</b>          | 10689 | 0.1111161   | No |
| <b>Trip6</b>         | 10713 | 0.11093855  | No |

|                  |       |             |    |
|------------------|-------|-------------|----|
| <b>Il15</b>      | 10750 | 0.10996198  | No |
| <b>Rhod</b>      | 10759 | 0.110706374 | No |
| <b>Ak2</b>       | 10773 | 0.11114345  | No |
| <b>Fgd3</b>      | 10780 | 0.11201076  | No |
| <b>Cfap54</b>    | 10801 | 0.1120176   | No |
| <b>Ezh2</b>      | 10828 | 0.11165567  | No |
| <b>Itgb1</b>     | 10852 | 0.11147811  | No |
| <b>Selenbp1</b>  | 10855 | 0.11259128  | No |
| <b>Mgst1</b>     | 10857 | 0.11376591  | No |
| <b>Sh3pxd2b</b>  | 10890 | 0.113035195 | No |
| <b>Cd151</b>     | 10891 | 0.11427129  | No |
| <b>Aldh3b1</b>   | 10910 | 0.11440105  | No |
| <b>Efemp2</b>    | 10997 | 0.11035135  | No |
| <b>Lrr1</b>      | 11035 | 0.10931332  | No |
| <b>Nqo1</b>      | 11071 | 0.108398214 | No |
| <b>Magt1</b>     | 11105 | 0.10760603  | No |
| <b>Gng12</b>     | 11162 | 0.105400205 | No |
| <b>Triobp</b>    | 11252 | 0.101166114 | No |
| <b>Ntn1</b>      | 11257 | 0.102156356 | No |
| <b>Prdx4</b>     | 11367 | 0.096693    | No |
| <b>Rreb1</b>     | 11386 | 0.09682276  | No |
| <b>Disp1</b>     | 11447 | 0.09437109  | No |
| <b>Pskh1</b>     | 11539 | 0.09001407  | No |
| <b>Dock6</b>     | 11571 | 0.089344814 | No |
| <b>Chek2</b>     | 11580 | 0.0900892   | No |
| <b>Arhgef40</b>  | 11592 | 0.09064921  | No |
| <b>Rgl3</b>      | 11605 | 0.09114775  | No |
| <b>Tmem150a</b>  | 11667 | 0.08863461  | No |
| <b>Adi1</b>      | 11803 | 0.081573226 | No |
| <b>Ano6</b>      | 11810 | 0.08244054  | No |
| <b>Trp53inp1</b> | 11829 | 0.08257031  | No |
| <b>Nedd1</b>     | 11839 | 0.083253235 | No |
| <b>Rorc</b>      | 11850 | 0.0838747   | No |
| <b>Cenpa</b>     | 11872 | 0.083820075 | No |
| <b>Nup188</b>    | 11875 | 0.08493324  | No |
| <b>Nrm</b>       | 11924 | 0.08321912  | No |
| <b>Asf1b</b>     | 11948 | 0.08304157  | No |
| <b>Pyroxd2</b>   | 11972 | 0.08286402  | No |
| <b>Phykpl</b>    | 11999 | 0.08250208  | No |
| <b>Chst14</b>    | 12018 | 0.08263184  | No |
| <b>Scube2</b>    | 12022 | 0.08368355  | No |
| <b>Tubb6</b>     | 12035 | 0.08418209  | No |
| <b>Trp53i13</b>  | 12037 | 0.08535672  | No |
| <b>Atf3</b>      | 12052 | 0.08573233  | No |
| <b>Bri3</b>      | 12061 | 0.08647673  | No |
| <b>Ercc6l</b>    | 12067 | 0.0874055   | No |
| <b>Gem</b>       | 12087 | 0.08747381  | No |
| <b>Parp4</b>     | 12100 | 0.08797234  | No |
| <b>Traf3ip2</b>  | 12112 | 0.08853235  | No |
| <b>Atraid</b>    | 12114 | 0.08970698  | No |
| <b>Matn2</b>     | 12118 | 0.09075869  | No |
| <b>Bmp1</b>      | 12140 | 0.09070406  | No |
| <b>Galm</b>      | 12177 | 0.08972749  | No |
| <b>Ube2c</b>     | 12205 | 0.08930409  | No |
| <b>En1</b>       | 12222 | 0.08955678  | No |
| <b>Cd24a</b>     | 12233 | 0.090178244 | No |
| <b>Adprh</b>     | 12245 | 0.09073825  | No |
| <b>Npepl1</b>    | 12252 | 0.09160557  | No |
| <b>Myl12a</b>    | 12262 | 0.092288494 | No |
| <b>Sertad3</b>   | 12292 | 0.091742165 | No |

|                      |       |             |    |
|----------------------|-------|-------------|----|
| <b>P4ha1</b>         | 12331 | 0.090642676 | No |
| <b>Hkdc1</b>         | 12360 | 0.09015781  | No |
| <b>Eml3</b>          | 12402 | 0.08887393  | No |
| <b>Efemp1</b>        | 12420 | 0.08906516  | No |
| <b>Bub1</b>          | 12476 | 0.08692079  | No |
| <b>A430105I19Rik</b> | 12502 | 0.086620316 | No |
| <b>Pttg1ip</b>       | 12515 | 0.08711886  | No |
| <b>Fkbp5</b>         | 12518 | 0.088232026 | No |
| <b>Oplah</b>         | 12556 | 0.087193996 | No |
| <b>Baz1a</b>         | 12568 | 0.087753996 | No |
| <b>Heatr5a</b>       | 12580 | 0.088314    | No |
| <b>Rnf135</b>        | 12712 | 0.08149847  | No |
| <b>Abhd4</b>         | 12722 | 0.082181394 | No |
| <b>Acy1</b>          | 12724 | 0.08335602  | No |
| <b>Lif</b>           | 12741 | 0.08360872  | No |
| <b>Phka1</b>         | 12829 | 0.079497546 | No |
| <b>Bag3</b>          | 12884 | 0.07741465  | No |
| <b>Usp40</b>         | 12892 | 0.0782205   | No |
| <b>Csf1</b>          | 13069 | 0.06863914  | No |
| <b>Ndc80</b>         | 13075 | 0.06956792  | No |
| <b>Wee1</b>          | 13115 | 0.06840696  | No |
| <b>Leng8</b>         | 13155 | 0.067246005 | No |
| <b>Slc50a1</b>       | 13180 | 0.06700699  | No |
| <b>Mamdc4</b>        | 13211 | 0.0663992   | No |
| <b>Hacd1</b>         | 13270 | 0.06407045  | No |
| <b>Ybx3</b>          | 13306 | 0.063155346 | No |
| <b>Fabp5</b>         | 13351 | 0.06168708  | No |
| <b>Nup37</b>         | 13399 | 0.06003442  | No |
| <b>Zfp3611</b>       | 13415 | 0.06034857  | No |
| <b>Gpr157</b>        | 13510 | 0.05580716  | No |
| <b>Cdk2</b>          | 13514 | 0.056858864 | No |
| <b>Sox2</b>          | 13525 | 0.05748033  | No |
| <b>Isl2</b>          | 13541 | 0.05779448  | No |
| <b>Erbin</b>         | 13565 | 0.05761693  | No |
| <b>BC028528</b>      | 13652 | 0.053567223 | No |
| <b>9230110C19Rik</b> | 13654 | 0.054741856 | No |
| <b>Casp7</b>         | 13661 | 0.05560917  | No |
| <b>Stk33</b>         | 13751 | 0.051375076 | No |
| <b>Sqrdl</b>         | 13791 | 0.05021412  | No |
| <b>Ddah2</b>         | 13818 | 0.04985218  | No |
| <b>Pfn4</b>          | 13890 | 0.046724413 | No |
| <b>Cmtm6</b>         | 13929 | 0.045624923 | No |
| <b>Acads</b>         | 13968 | 0.04452543  | No |
| <b>Pdlim4</b>        | 13976 | 0.045331284 | No |
| <b>Cep55</b>         | 14058 | 0.041588888 | No |
| <b>Hdac1</b>         | 14077 | 0.04171865  | No |
| <b>Cdkn1a</b>        | 14180 | 0.036685538 | No |
| <b>Orai3</b>         | 14273 | 0.032267053 | No |
| <b>Ctsh</b>          | 14353 | 0.028647585 | No |
| <b>Tmco4</b>         | 14370 | 0.028900273 | No |
| <b>Tnfaip8</b>       | 14377 | 0.029767592 | No |
| <b>Myo7a</b>         | 14381 | 0.030819297 | No |
| <b>Ptk7</b>          | 14409 | 0.030395893 | No |
| <b>Hes1</b>          | 14412 | 0.031509064 | No |
| <b>S100a10</b>       | 14452 | 0.030348107 | No |
| <b>Lpar6</b>         | 14461 | 0.031092498 | No |
| <b>Agtrap</b>        | 14471 | 0.031775426 | No |
| <b>Ribc1</b>         | 14537 | 0.029016437 | No |
| <b>Appl2</b>         | 14556 | 0.0291462   | No |
| <b>Msn</b>           | 14615 | 0.026817452 | No |

|                  |       |               |    |
|------------------|-------|---------------|----|
| <b>Cbfb</b>      | 14703 | 0.022706281   | No |
| <b>Limk2</b>     | 14711 | 0.023512134   | No |
| <b>Vegfb</b>     | 14765 | 0.021490699   | No |
| <b>Eomes</b>     | 14835 | 0.018485859   | No |
| <b>Plxnb2</b>    | 14925 | 0.014251763   | No |
| <b>Srebf1</b>    | 14931 | 0.015180542   | No |
| <b>Ddr1</b>      | 14934 | 0.01629371    | No |
| <b>Necap2</b>    | 14964 | 0.015747383   | No |
| <b>Eva1c</b>     | 15107 | 0.008255757   | No |
| <b>Abcd4</b>     | 15129 | 0.008201132   | No |
| <b>Rbm38</b>     | 15144 | 0.008576746   | No |
| <b>Itga5</b>     | 15187 | 0.007231402   | No |
| <b>Robo3</b>     | 15201 | 0.0076684793  | No |
| <b>Gypc</b>      | 15242 | 0.0064460607  | No |
| <b>Gm7694</b>    | 15244 | 0.007620692   | No |
| <b>Ddo</b>       | 15280 | 0.0067055873  | No |
| <b>Nexn</b>      | 15290 | 0.007388516   | No |
| <b>Mapkapk3</b>  | 15302 | 0.007948519   | No |
| <b>Evc2</b>      | 15307 | 0.008938761   | No |
| <b>Lck</b>       | 15337 | 0.008392434   | No |
| <b>Six5</b>      | 15381 | 0.0069856266  | No |
| <b>Nfkb2</b>     | 15454 | 0.003796398   | No |
| <b>Spata17</b>   | 15481 | 0.0034344587  | No |
| <b>Smo</b>       | 15486 | 0.0044247014  | No |
| <b>Vim</b>       | 15514 | 0.0040012994  | No |
| <b>Nphp3</b>     | 15545 | 0.0033935087  | No |
| <b>Ecm2</b>      | 15648 | -0.0016396045 | No |
| <b>Cyb5r1</b>    | 15678 | -0.0021859321 | No |
| <b>Hs3st3a1</b>  | 15706 | -0.0026093342 | No |
| <b>Tead2</b>     | 15721 | -0.0022337197 | No |
| <b>Fas</b>       | 15761 | -0.0033946757 | No |
| <b>Dyrk3</b>     | 15764 | -0.0022815072 | No |
| <b>Zfp36</b>     | 15803 | -0.0033810004 | No |
| <b>Tnc</b>       | 15850 | -0.004972196  | No |
| <b>Rps27l</b>    | 15887 | -0.0059487633 | No |
| <b>Procr</b>     | 15907 | -0.005880463  | No |
| <b>Yap1</b>      | 15922 | -0.0055048484 | No |
| <b>Slc2a9</b>    | 15927 | -0.0045146057 | No |
| <b>Syde1</b>     | 15949 | -0.004569231  | No |
| <b>Emilin1</b>   | 15957 | -0.0037633767 | No |
| <b>Mttp</b>      | 15987 | -0.0043097045 | No |
| <b>Eif4ebp1</b>  | 15994 | -0.0034423873 | No |
| <b>Slc37a2</b>   | 16008 | -0.00300531   | No |
| <b>Cd276</b>     | 16040 | -0.0036745635 | No |
| <b>Nfatc1</b>    | 16061 | -0.0036677257 | No |
| <b>Ccdc17</b>    | 16188 | -0.010175946  | No |
| <b>Cfap77</b>    | 16222 | -0.010968125  | No |
| <b>Fos</b>       | 16225 | -0.009854957  | No |
| <b>Tnfrsf12a</b> | 16284 | -0.012183706  | No |
| <b>Tmem238</b>   | 16302 | -0.011992481  | No |
| <b>Pck2</b>      | 16308 | -0.011063701  | No |
| <b>Il18</b>      | 16315 | -0.010196384  | No |
| <b>Metrn1</b>    | 16331 | -0.009882232  | No |
| <b>Ppp1r14b</b>  | 16395 | -0.012518295  | No |
| <b>Gng5</b>      | 16413 | -0.012327069  | No |
| <b>Cd93</b>      | 16441 | -0.012750471  | No |
| <b>Tlr3</b>      | 16454 | -0.012251931  | No |
| <b>Arhgap18</b>  | 16460 | -0.011323151  | No |
| <b>Cdca7</b>     | 16522 | -0.013836289  | No |
| <b>F2r</b>       | 16557 | -0.014689931  | No |

|                 |       |               |    |
|-----------------|-------|---------------|----|
| <b>Bcl2l12</b>  | 16567 | -0.014007002  | No |
| <b>Txlnb</b>    | 16576 | -0.013262611  | No |
| <b>Eda2r</b>    | 16598 | -0.013317236  | No |
| <b>Alox5</b>    | 16647 | -0.015031357  | No |
| <b>Dnaaf3</b>   | 16670 | -0.015147446  | No |
| <b>Adamts14</b> | 16702 | -0.015816698  | No |
| <b>Tgm5</b>     | 16719 | -0.01556401   | No |
| <b>Ccdc102a</b> | 16745 | -0.015864486  | No |
| <b>Spata9</b>   | 16754 | -0.015120095  | No |
| <b>Casp1</b>    | 16758 | -0.014068389  | No |
| <b>Suclg2</b>   | 16767 | -0.013323998  | No |
| <b>Ddit4l</b>   | 16783 | -0.013009846  | No |
| <b>Cdkn2b</b>   | 16791 | -0.012203992  | No |
| <b>Tgif2</b>    | 16800 | -0.0114596    | No |
| <b>Dnali1</b>   | 16804 | -0.010407895  | No |
| <b>Iqgap2</b>   | 16810 | -0.009479116  | No |
| <b>Ccdc159</b>  | 16822 | -0.008919112  | No |
| <b>Fndc1</b>    | 16830 | -0.0081132585 | No |
| <b>Pbxip1</b>   | 16834 | -0.0070615527 | No |
| <b>Nup62cl</b>  | 16849 | -0.006685938  | No |
| <b>Foxj1</b>    | 16863 | -0.0062488606 | No |
| <b>Agbl2</b>    | 16871 | -0.0054430068 | No |
| <b>Lama5</b>    | 16890 | -0.0053132433 | No |
| <b>Syt14</b>    | 16904 | -0.004876166  | No |
| <b>Ccdc89</b>   | 16908 | -0.0038244606 | No |
| <b>Papln</b>    | 16945 | -0.004801028  | No |
| <b>Cd36</b>     | 16969 | -0.0049785785 | No |
| <b>Mamdc2</b>   | 16972 | -0.0038654103 | No |
| <b>Mtmr11</b>   | 17002 | -0.0044117384 | No |
| <b>Cybrd1</b>   | 17006 | -0.0033600326 | No |
| <b>Card9</b>    | 17011 | -0.0023697899 | No |
| <b>Fam181a</b>  | 17020 | -0.0016253986 | No |
| <b>Car2</b>     | 17037 | -0.0013727096 | No |
| <b>F2rl1</b>    | 17049 | -8,13E+02     | No |
| <b>Six3</b>     | 17066 | -5,60E+02     | No |
| <b>Erbp2</b>    | 17070 | 4,92E+02      | No |

**Supplemental List 3 – Primary and secondary antibodies used in the study**

|                                                         |                          |           |
|---------------------------------------------------------|--------------------------|-----------|
| mouse anti-GFAP                                         | Chemicon                 | MAB3402   |
| rat anti-MBP                                            | Chemicon                 | MAB385    |
| mouse anti-NeuN                                         | Chemicon                 | MAB377    |
| Mouse anti-GalC                                         | Chemicon                 | MAB342    |
| rabbit anti-GFAP                                        | Dako                     | Z0334     |
| rabbit anti-S100                                        | Dako                     | N1573     |
| rabbit anti-Iba-1                                       | Wako                     | 019-19741 |
| mouse anti-Nestin clone Rat401                          | Millipore                | MAB353    |
| rabbit anti-Ki67                                        | Novocastra               | NCL-ki67  |
| mouse anti-Tuj1                                         | Covance                  | PRB-435P  |
| mouse anti-Pax6                                         | Abcam                    | Ab-197768 |
| rabbit anti-Vimentin                                    | Abcam                    | Ab-27608  |
| rabbit anti-SGK                                         | Abcam                    | Ab-59337  |
| goat anti-Doublecortin                                  | Santa Cruz Biotechnology | SC-8066   |
| rabbit anti-pSGK <sub>S422</sub>                        | Santa Cruz Biotechnology | SC-16745  |
| rabbit anti-RFP                                         | MBL Life Science         | PM005     |
| mouse anti-Sox2                                         | R&D Systems              | MAB2018   |
| mouse anti-GAPDH                                        | Sigma-Aldrich            | G8795     |
| rabbit anti-Calnexin                                    | Genetex                  | CTX13504  |
| rabbit anti-NDRG1 clone D6C2                            | Cell Signaling           | 9408      |
| rabbit anti-pNDRG1                                      | Cell Signaling           | 5482      |
| rabbit anti-S6                                          | Cell Signaling           | 2217      |
| rabbit anti-pS6 <sub>S235/236</sub>                     | Cell Signaling           | 4858      |
| rabbit anti-Tsc1                                        | Cell Signaling           | 4906      |
| rabbit anti-Tsc2 clone D93F12                           | Cell Signaling           | 4308      |
| rabbit anti-Rictor                                      | Cell Signaling           | 2114      |
| rabbit anti-Raptor                                      | Cell Signaling           | 2280      |
| rabbit anti-PTEN                                        | Cell Signaling           | 9188      |
| rabbit anti-Akt clone C67E7                             | Cell Signaling           | 4691      |
| mouse anti-pAkt <sub>T308</sub> C31E5E                  | Cell Signaling           | 2965      |
| mouse anti-pAkt <sub>S473</sub> D9E                     | Cell Signaling           | 4060      |
| rabbit anti-ERK                                         | Cell Signaling           | 4695      |
| rabbit anti-pERK1/2 <sub>T202/Y204</sub>                | Cell Signaling           | 4370      |
| rabbit anti-GSK3 $\beta$                                | Cell Signaling           | 9315      |
| rabbit anti-pGSK3 $\beta$ <sub>S9</sub>                 | Cell Signaling           | 9323      |
| rabbit anti-pSin1 <sub>T86</sub> clone D4V9L            | Cell Signaling           | 14716     |
| rabbit anti-Sin1                                        | Bethyl                   | A300-910A |
| Alexa Fluor <sup>®</sup> 546 goat anti-mouse IgG (H+L)  | Invitrogen               | A11003    |
| Alexa Fluor <sup>®</sup> 546 goat anti-rabbit IgG (H+L) | Invitrogen               | A11010    |
| Alexa Fluor <sup>®</sup> 488 goat anti-mouse IgG (H+L)  | Invitrogen               | A11001    |
| Alexa Fluor <sup>®</sup> 488 goat anti-rabbit IgG (H+L) | Invitrogen               | A11008    |
